# Supplementary material for: Characterization and Prediction of Protein Phosphorylation Hotspots in Arabidopsis thaliana
Source: Front Plant Sci. 2012 Sep 5;3:207. doi: 10.3389/fpls.2012.00207 (PMC3433687; doi:10.3389/fpls.2012.00207)
Supplement: Supplementary Table S1 — Predicted hotspots in the Arabidopsis proteome based SVM score >1. (Excel Table). File also contains data sheet of Arabidopsis P-hotspot containing proteins detected based on experimentally identified phosphorylation sites. [file 32729_Walther_DataSheet1.XLSX]

## Sheet: Experimental Sites
AGI ID	Gene Symbol	Annotation	Phosphorylation Sites	Start of hotspot	Hotspot sequence
AT1G01540.1		protein kinase family protein	102, 106, 107, 110	98	RVVFSDRVSSGESRGTA
AT1G07985.1		Expressed protein	130, 132, 134, 138	126	KVVGSSSPTNIHSKSWR
AT1G08680.1	ZIGA4, AGD14	ZIGA4 (ARF GAP-like zinc finger-containing protein ZiGA4); ARF GTPase activator/ DNA binding / zinc ion binding	190, 191, 194, 195	184	GLHAKASSFVYSPGRFS
AT1G20440.1	COR47, RD17	COR47 (COLD-REGULATED 47)	89, 98, 108, 113	86	QEKTEEDEENKPSVIEKLHRSNSSSSSSSDE
AT1G26540.1		agenet domain-containing protein	324, 328, 334, 336	321	HLRSFLNSKEISETPTKAK
AT1G27500.1		kinesin light chain-related	32, 33, 36, 44	29	ELQSSNQSPSRQSFGSYGD
AT1G29220.1		transcriptional regulator family protein	80, 82, 86, 89	76	GVGASSSAHGTPRSLDN
AT1G29350.1		EXPRESSED IN: male gametophyte, guard cell, pollen tube; EXPRESSED DURING: L mature pollen stage, M germinated pollen stage; BEST Arabidopsis thaliana protein match is: kinase-related (TAIR:AT1G29370.1);	105, 107, 108, 112	100	RYAGRSGSTHFSSTDSG
AT1G35580.1	CINV1	CINV1 (cytosolic invertase 1); beta-fructofuranosidase	43, 45, 48, 49	38	SFDERSMSELSTGYSRH
AT1G35580.1	CINV1	CINV1 (cytosolic invertase 1); beta-fructofuranosidase	60, 65, 69, 72, 73	57	IHDSPRGRSVLDTPLSSARN
AT1G45688.1		unknown protein	15, 19, 29, 31, 34	12	AASSPARSPRRPVYYVQSPSRDSHDG
AT1G55310.1	SR33, ATSCL33, SCL33	SR33; RNA binding / protein binding	4, 5, 6, 8	0	MRGRSYTPSPPRGYGRR
AT1G59710.1		EXPRESSED IN: 23 plant structures; EXPRESSED DURING: 13 growth stages; CONTAINS InterPro DOMAIN/s: Protein of unknown function DUF569 (InterPro:IPR007679), Actin_cross-linking (InterPro:IPR008999);	195, 196, 198, 203	191	FRQESTDSLAVGSPPKS
AT1G59870.1	PEN3, PDR8, ATPDR8	PEN3 (PENETRATION 3); ATPase, coupled to transmembrane movement of substances / cadmium ion transmembrane transporter	36, 39, 42, 44	32	EDIFSSGSRRTQSVNDD
AT1G62830.1	LDL1, SWP1, ATSWP1	LDL1 (LSD1-LIKE1); amine oxidase/ electron carrier/ oxidoreductase	820, 822, 830, 831	817	ERKSLSQEGESMISSLKA
AT1G66680.1	AR401	AR401	34, 44, 46, 53	31	SLASDDDRSIAADSWSIKSEYGSTLD
AT1G73200.1		phosphoinositide binding	312, 314, 316, 317	306	VQVISRSWSHSSHASDV
AT1G76920.1		F-box family protein (FBX3)	177, 178, 180, 190	174	ALYYSGTVVANQWLKFSSNL
AT1G80530.1		nodulin family protein	270, 271, 275, 276	265	RSNAKSSPLGSSDNLAK
AT2G01190.1		octicosapeptide/Phox/Bem1p (PB1) domain-containing protein	381, 386, 394, 399	378	RVYSDDERSDHGVQAGYRKPPTPRS
AT2G23350.1	PAB4, PABP4	PAB4 (POLY(A) BINDING PROTEIN 4); RNA binding / translation initiation factor	640, 647, 649, 656	637	SQGSEGNKSGSPSDLLASLSIND
AT2G26730.1		leucine-rich repeat transmembrane protein kinase, putative	631, 632, 636, 639, 648	628	LRQSSDDPSKGSEGQTPPGESRTP
AT2G29210.1		splicing factor PWI domain-containing protein	390, 392, 395, 400, 402, 405	387	RRRSPSPLYRRNRSPSPLYRRN
AT2G31650.1	ATX1, SDG27	ATX1 (ARABIDOPSIS HOMOLOGUE OF TRITHORAX); histone-lysine N-methyltransferase/ phosphatidylinositol-5-phosphate binding	481, 482, 484, 487, 489	477	MRKFTSLTDHSASALYK
AT2G35030.1		pentatricopeptide (PPR) repeat-containing protein	110, 112, 116, 121	107	NVVTWTAMVSGYLRSKQL
AT2G35350.1	PLL1	PLL1 (POLTERGEIST LIKE 1); catalytic/ protein serine/threonine phosphatase	188, 190, 192, 198	185	GEISRSNSAGVHFSAPL
AT2G35880.1		EXPRESSED IN: 24 plant structures; EXPRESSED DURING: 13 growth stages; CONTAINS InterPro DOMAIN/s: Targeting for Xklp2 (InterPro:IPR009675);	108, 111, 116, 117	104	YTDITRKSIDATTSKTS
AT2G37340.1	RSZ33, ATRSZ33	RSZ33; nucleic acid binding / nucleotide binding / zinc ion binding	201, 203, 210, 218, 225, 229, 238, 244, 252, 255, 264, 265	198	MDDSLSPRARDRSPVLDDEGSPKIIDGSPPPSPKLQKEVGSDRDGGSPQDNGRNSVVSPVVGAGGDSSKED
AT2G41705.1		camphor resistance CrcB family protein	60, 64, 65, 68	56	RRRHSAGRSSRLSADDF
AT2G41720.1	EMB2654	EMB2654 (EMBRYO DEFECTIVE 2654)	529, 531, 537, 539	526	KADSVTFTILISGSCRM
AT2G41740.1	VLN2, ATVLN2	VLN2 (VILLIN 2); actin binding	845, 848, 854, 855	842	NKKSPDTSPTRRSTSSN
AT2G43680.1	IQD14	IQD14; calmodulin binding	125, 127, 132, 142	122	VPRTLSPKPPSPRAEVPRSLSPKP
AT2G45540.1		WD-40 repeat family protein / beige-related	1612, 1613, 1618, 1621	1608	SSERSSGNSVTLDSGSQ
AT2G46170.1		reticulon family protein (RTNLB5)	27, 28, 29, 30, 31	21	KIHHHDSSSSSESEYEK
AT2G46495.1		zinc finger (C3HC4-type RING finger) family protein	401, 405, 407, 410	397	KRLLTFNISGSPFSPRF
AT3G05090.1		transducin family protein / WD-40 repeat family protein	368, 378, 385, 392	365	EVQSPKTVFQRGGSFLAGNLSFNRARVSLEG
AT3G07790.1		DGCR14-related	117, 120, 121, 127	114	KTQTPGSTFLRNFTPLD
AT3G13570.1	SCL30A	SCL30a; RNA binding / nucleic acid binding / nucleotide binding	165, 173, 175, 177	162	GYNSPPAKRHQSRSVSPQD
AT3G13990.1		unknown protein	493, 495, 498, 501	489	RVSRSDSPVSAVSEPQL
AT3G17420.1	GPK1	GPK1; ATP binding / kinase/ protein kinase/ protein serine/threonine kinase	58, 62, 69, 74, 75	55	VTQSPRFTEEIKEISVDHGSSNNN
AT3G23100.1	XRCC4	XRCC4; protein C-terminus binding	224, 225, 230, 233	220	EEEESTDKAESFESGRS
AT3G27960.1		kinesin light chain-related	573, 577, 581, 582, 588	570	CGPYHPDTLAVYSNLAGTYDAM
AT3G29310.1		calmodulin-binding protein-related	324, 325, 326, 331	319	NRHDLTSSAEDDSVDGD
AT3G29390.1	RIK	RIK (RS2-Interacting KH protein); RNA binding	511, 513, 516, 517	506	PPRSKTMSPLSSKSMLP
AT3G48530.1	KING1	KING1 (SNF1-RELATED PROTEIN KINASE REGULATORY SUBUNIT GAMMA 1)	11, 13, 18, 21, 22	8	IMRSESLGHRSDVSSPEA
AT3G52400.1	SYP122, ATSYP122	SYP122 (SYNTAXIN OF PLANTS 122); SNAP receptor	7, 17, 21, 27	4	LSGSFKTSVADGSSPPHSHNIEMSKAK
AT3G52930.1		fructose-bisphosphate aldolase, putative	31, 32, 34, 41	28	ADESTGTIGKRLASINV
AT3G53500.1	RSZ32	zinc knuckle (CCHC-type) family protein	172, 174, 183, 188, 190, 193	169	RDQSLSPDRKVIDASPKRGSDYDGSPKE
AT3G55460.1	SCL30	SCL30; RNA binding / nucleic acid binding / nucleotide binding	3, 4, 7, 9	0	MRRYSPPYYSPPRRGYG
AT3G55460.1	SCL30	SCL30; RNA binding / nucleic acid binding / nucleotide binding	175, 177, 179, 181	170	DSRSRYRSRSYSPAPRR
AT3G55460.1	SCL30	SCL30; RNA binding / nucleic acid binding / nucleotide binding	203, 204, 205, 208	197	ENYSRRSYSPGYEGAAA
AT3G56510.1		TBP-binding protein, putative	232, 237, 238, 240	228	RQKKSIENETSQSKPGL
AT3G58940.1		F-box family protein	112, 115, 118, 121	108	QRGVSDLYLFTDFSDED
AT3G61860.1	ATRSP31, RSP31	RSP31; RNA binding / nucleic acid binding / nucleotide binding	246, 252, 254, 256	243	RQRSPGYDRYRSRSPVP
AT3G62280.1		carboxylesterase/ hydrolase, acting on ester bonds	90, 93, 95, 98, 100	87	LKMTYLSPYLDSLSPNF
AT4G05150.1		octicosapeptide/Phox/Bem1p (PB1) domain-containing protein	263, 265, 269, 276	260	EVSTLSDPGSPRRDVPSPYG
AT4G07523.1		transposable element gene; similar to unknown protein [Arabidopsis thaliana] (TAIR:AT5G27180.1)	3, 5, 6, 8, 9, 10		MPLSYSSPSSSEERSDD
AT4G11740.1	SAY1	SAY1	312, 314, 323, 325, 327	309	RAASGSLAPPNADRSRSGSPEE
AT4G13510.1	AMT1;1, ATAMT1, ATAMT1;1	AMT1;1 (AMMONIUM TRANSPORTER 1;1); ammonium transmembrane transporter	487, 489, 491, 495	483	VEPRSPSPSGANTTPTP
AT4G25160.1		protein kinase family protein	312, 314, 321, 323	309	TRFSWSGMGVDTTHSRAS
AT4G25580.1		stress-responsive protein-related	155, 157, 161, 167	152	GAPTLTPHNTPVSLLSATE
AT4G31580.1	SRZ-22, SRZ22, RSZP22	SRZ-22; protein binding	159, 169, 171, 173, 177	156	RRRSPSPPPARGRSYSRSPPPYRAR
AT4G31700.1	RPS6	RPS6 (RIBOSOMAL PROTEIN S6); structural constituent of ribosome	230, 236, 239, 240, 246	227	RSESLAKKRSRLSSAAAKPSVTA
AT4G32250.1		protein kinase family protein	12, 21, 23, 29, 30	9	PDDTEYEIIEGESESALAAGTSPWM
AT4G35785.1		nucleic acid binding / nucleotide binding	40, 42, 48, 50	37	RSRSRSLPRPVSPSRSR
AT4G38600.1	KAK, UPL3	KAK (KAKTUS); ubiquitin-protein ligase	1366, 1367, 1372, 1373, 1374	1362	EGKITSLDDLSTTAAKV
AT4G39680.1		SAP domain-containing protein	310, 318, 319, 323	307	AGDSEKLNLDRSSGDESMED
AT5G02240.1		binding / catalytic/ coenzyme binding	234, 235, 236, 238	228	GSKPEGTSTPTKDFKAL
AT5G04930.1	ALA1	ALA1 (aminophospholipid ATPase1); ATPase, coupled to transmembrane movement of ions, phosphorylative mechanism	39, 46, 51, 57	36	DLGSKRIRHGSAGADSEMLSMSQKE
AT5G06210.1		RNA-binding protein, putative	136, 138, 139, 141, 142	129	DPAVIAATRTTETSKSD
AT5G18660.1	PCB2	PCB2 (PALE-GREEN AND CHLOROPHYLL B REDUCED 2); 3,8-divinyl protochlorophyllide a 8-vinyl reductase	370, 378, 381, 382	367	AAESMLILDPETGEYSEEK
AT5G21160.1		La domain-containing protein / proline-rich family protein	369, 377, 380, 383	366	SAETIGDGDKDSPKSITSGDN
AT5G41600.1	BTI3	BTI3 (VIRB2-INTERACTING PROTEIN 3)	24, 25, 28, 30	19	HGHGDSSSLSDSDDDKK
AT5G47690.1		binding	1273, 1280, 1283, 1288	1270	HLESDMDKNVSLDSHDENSDQE
AT5G52040.1	ATRSP41	ATRSP41; RNA binding / nucleic acid binding / nucleotide binding	191, 201, 209, 218, 219, 228, 230, 232, 238	188	RRRSPSPYRRERGSPDYGRGASPVAHKRERTSPDYGRGRRSPSPYKRARLSPDY
AT5G52040.1	ATRSP41	ATRSP41; RNA binding / nucleic acid binding / nucleotide binding	336, 341, 346, 348, 350	333	GRGYDGADSPIRESPSRSPPA
AT5G57110.1	ACA8, AT-ACA8	ACA8 (AUTOINHIBITED CA2+ -ATPASE, ISOFORM 8); calcium-transporting ATPase/ calmodulin binding / protein self-association	18, 21, 26, 28	15	DVESGKSEHADSDSDTF
AT5G62820.1		integral membrane protein, putative	27, 30, 40, 46	24	RFHSPLSDAGDLPESRYVSPEGSPFK
AT5G64200.1	ATSC35, SC35	ATSC35; RNA binding / nucleic acid binding / nucleotide binding	273, 277, 279, 282	269	PERRSNERSPSPGSPAP

## Sheet: Predicted Hotspots
AGI ID	Gene Symbol	Annotation	Start of hotspot	Hotspot sequence
AT1G01010.1	ANAC001	ANAC001 (Arabidopsis NAC domain containing protein 1); transcription factor	177	MTSSAGSVVNQSRQRNSGSYN
AT1G01010.1	ANAC001	ANAC001 (Arabidopsis NAC domain containing protein 1); transcription factor	63	YFFSRRENNKGNRQSRTTVSG
AT1G01020.1	ARV1	ARV1	92	CYRSLLLRKSDEESSFSDSPVLLS
AT1G01020.2	ARV1	ARV1	92	CYRSLLLRKSDEESSFSDSPVLLS
AT1G01040.1	DCL1, CAF, SUS1, SIN1, ASU1, EMB76, EMB60, ATDCL1	DCL1 (DICER-LIKE 1); ATP-dependent helicase/ double-stranded RNA binding / protein binding / ribonuclease III	119	GDKDRKRARVCSYQSERSNLSGR
AT1G01090.1	PDH-E1 ALPHA	PDH-E1 ALPHA (PYRUVATE DEHYDROGENASE E1 ALPHA); pyruvate dehydrogenase (acetyl-transferring)	30	APPSSFLGSTRSLSLRRLNHSNATRRSPVVSV
AT1G01110.1	IQD18	IQD18 (IQ-domain 18)	157	DTSQPYSRTGAGSPSRGQRPSSPSRTSHHYQSRNNFSA
AT1G01110.1	IQD18	IQD18 (IQ-domain 18)	221	RDRAAYSYTSNTPSLRSNYSFTARSG
AT1G01110.1	IQD18	IQD18 (IQ-domain 18)	309	YEDNNSLRSPSFKSVAGSHFGGML
AT1G01110.1	IQD18	IQD18 (IQ-domain 18)	9	VRVQSRVLDQRKRLSHDGSRKSAFSDSHAVFESRYLQDLSDRQSMSREGSSAA
AT1G01110.2	IQD18	IQD18 (IQ-domain 18)	172	VRVQSRVLDQRKRLSHDGSRKSAFSDSHAVFESRYLQDLSDRQSMSREGSSAA
AT1G01110.2	IQD18	IQD18 (IQ-domain 18)	320	DTSQPYSRTGAGSPSRGQRPSSPSRTSHHYQSRNNFSA
AT1G01110.2	IQD18	IQD18 (IQ-domain 18)	384	RDRAAYSYTSNTPSLRSNYSFTARSG
AT1G01110.2	IQD18	IQD18 (IQ-domain 18)	472	YEDNNSLRSPSFKSVAGSHFGGML
AT1G01120.1	KCS1	KCS1 (3-KETOACYL-COA SYNTHASE 1); acyltransferase/ fatty acid elongase	312	AILLSNRRQDRKKSKYSLVNVVRT
AT1G01140.1	CIPK9, SnRK3.12, PKS6	CIPK9 (CBL-INTERACTING PROTEIN KINASE 9); ATP binding / kinase/ protein kinase/ protein serine/threonine kinase	0	MSGSRRKATPASRTRVGN
AT1G01140.2	CIPK9, PKS6	CIPK9 (CBL-INTERACTING PROTEIN KINASE 9); ATP binding / kinase/ protein kinase/ protein serine/threonine kinase	0	MSGSRRKATPASRTRVGN
AT1G01140.3	CIPK9, PKS6	CIPK9 (CBL-INTERACTING PROTEIN KINASE 9); ATP binding / kinase/ protein kinase/ protein serine/threonine kinase	0	MSGSRRKATPASRTRVGN
AT1G01240.1		unknown protein	178	KDRFERSLSYNGSTESKNTSPMSSPRSDDLSKG
AT1G01240.2		unknown protein	178	KDRFERSLSYNGSTESKNTSPMSSPRSDDLSKG
AT1G01240.3		unknown protein	178	KDRFERSLSYNGSTESKNTSPMSSPRSDDLSKG
AT1G01260.1		basic helix-loop-helix (bHLH) family protein	183	NSGSDYCVRSFLAKSAG
AT1G01260.2		basic helix-loop-helix (bHLH) family protein	183	NSGSDYCVRSFLAKSAG
AT1G01300.1		aspartyl protease family protein	88	DELFSSRLQRDSRRVKSIATLA
AT1G01370.1	HTR12, CENH3	HTR12; DNA binding	49	PTTSPATGTRRGAKRSRQAMPRGSQKKSYRYRP
AT1G01370.2	HTR12, CENH3	HTR12; DNA binding	49	PTTSPATGTRRGAKRSRQAMPRGSQKKSYRYRP
AT1G01440.1		extra-large G-protein-related	28	ESATSPMRNRLDDSNSRPGSQRFVKSSRKEEE
AT1G01440.1		extra-large G-protein-related	386	SISSEPRKQVVKSVRSR
AT1G01460.1	ATPIPK11, PIPK11	PIPK11; 1-phosphatidylinositol-4-phosphate 5-kinase/ phosphatidylinositol phosphate kinase	240	VYDSFTSRGSVDSNSSK
AT1G01510.1	AN	AN (ANGUSTIFOLIA); protein binding	165	LGIVGRSVSARYLASRSLAFKMS
AT1G01510.1	AN	AN (ANGUSTIFOLIA); protein binding	407	TAVKPEGRRSRSGKKAKKRHSQQKY
AT1G01510.1	AN	AN (ANGUSTIFOLIA); protein binding	461	LSSSSRCASPEDSRSRKTPLE
AT1G01540.1		protein kinase family protein	96	EHRVVFSDRVSSGESRGT
AT1G01540.2		protein kinase family protein	428	DLLYRDERRTTRDHGSRERQETAV
AT1G01540.2		protein kinase family protein	96	EHRVVFSDRVSSGESRGT
AT1G01570.1		fringe-related protein	111	SSDTSRFQYRYPKGLRSA
AT1G01610.1	ATGPAT4, GPAT4	GPAT4 (GLYCEROL-3-PHOSPHATE ACYLTRANSFERASE 4); 1-acylglycerol-3-phosphate O-acyltransferase/ acyltransferase	1	SPAKKSRSFPPISECKSREYDS
AT1G01680.1		U-box domain-containing protein	208	EESPKKGRKETIEKSKSNESDE
AT1G01700.1	ATROPGEF2, ROPGEF2	ROPGEF2; Rho guanyl-nucleotide exchange factor/ protein binding	246	EGSLSMKSTRSATGSFRKV
AT1G01720.1	ATAF1, ANAC002	ATAF1; transcription activator/ transcription factor	64	FFSPRDRKYPNGSRPNRSAGSGY
AT1G01730.1		unknown protein	126	IGESPKREKTAKSDSLSNGK
AT1G01750.1	ADF11	ADF11 (ACTIN DEPOLYMERIZING FACTOR 11); actin binding	92	DTSRVRSKMLYASSKDRFKR
AT1G01760.1		RNA binding / adenosine deaminase	252	QSLHSPDNFSLADHLRRSLYER
AT1G01760.1		RNA binding / adenosine deaminase	363	LKETHGHKRESSKSKKSYRELKNKA
AT1G01790.1	KEA1, ATKEA1	KEA1 (K EFFLUX ANTIPORTER 1); potassium ion transmembrane transporter/ potassium:hydrogen antiporter	463	PKEGSSLNSPKASFNKSSRFFS
AT1G01790.1	KEA1, ATKEA1	KEA1 (K EFFLUX ANTIPORTER 1); potassium ion transmembrane transporter/ potassium:hydrogen antiporter	719	QERGESTSRHGRASFSVLL
AT1G01810.1		unknown protein	5	KRSTATTRRRTNDGGSP
AT1G01860.1	PFC1	PFC1 (PALEFACE 1); mRNA (2'-O-methyladenosine-N6-)-methyltransferase	39	SRRRTVKVSCGKSSPDDYHSTLKSLNSRGRFPRKSLGQHY
AT1G01880.1		DNA repair protein, putative	76	TPSPLKSQARISRFFRSSG
AT1G01900.1	ATSBT1.1, SBTI1.1	SBTI1.1; serine-type endopeptidase	160	SFRDTHMTPVPSRWRGS
AT1G01900.1	ATSBT1.1, SBTI1.1	SBTI1.1; serine-type endopeptidase	524	AGWSPFSSPSLLRSDPRRVQ
AT1G01920.1		SET domain-containing protein	520	LESHEESRDLDGRRMSRNKWSSVV
AT1G01920.2		SET domain-containing protein	495	LESHEESRDLDGRRMSRNKWSSVV
AT1G01950.1	ARK2	armadillo/beta-catenin repeat family protein / kinesin motor family protein	11	RGSMRPVSGANSSNLRSSSFKSRIPSS
AT1G01950.1	ARK2	armadillo/beta-catenin repeat family protein / kinesin motor family protein	864	SREDIRSLAHRTLSSSPVFRSEIRRLG
AT1G01950.2	ARK2	armadillo/beta-catenin repeat family protein / kinesin motor family protein	11	RGSMRPVSGANSSNLRSSSFKSRIPSS
AT1G01950.2	ARK2	armadillo/beta-catenin repeat family protein / kinesin motor family protein	847	SREDIRSLAHRTLSSSPVFRSEIRRLG
AT1G01950.3	ARK2	armadillo/beta-catenin repeat family protein / kinesin motor family protein	11	RGSMRPVSGANSSNLRSSSFKSRIPSS
AT1G01950.3	ARK2	armadillo/beta-catenin repeat family protein / kinesin motor family protein	885	SREDIRSLAHRTLSSSPVFRSEIRRLG
AT1G01960.1	EDA10	EDA10 (embryo sac development arrest 10); ARF guanyl-nucleotide exchange factor/ binding / guanyl-nucleotide exchange factor	41	ERLRSPENSSPVADSESGSS
AT1G02000.1	GAE2	GAE2 (UDP-D-GLUCURONATE 4-EPIMERASE 2); UDP-glucuronate 4-epimerase/ catalytic	49	FFYRSPISNPDSSRRSLRTYSWGG
AT1G02010.1		SEC1A (SIMILAR TO ELECTRON CAREER 1A); protein transporter	537	SSHKEESEARTGSVRKSS
AT1G02010.1		SEC1A (SIMILAR TO ELECTRON CAREER 1A); protein transporter	557	TAVPERKATPHSMRSRRTATWARPHSSD
AT1G02030.1		zinc finger (C2H2 type) family protein	50	LQDRESETESSKKPSRKRSRLNRRSISSLRHQQSN
AT1G02060.1		pentatricopeptide (PPR) repeat-containing protein	25	TNEERSTKSKLARSLARAVNSNPW
AT1G02065.1	SPL8	SPL8 (SQUAMOSA PROMOTER BINDING PROTEIN-LIKE 8); DNA binding	156	FSAADDDFVSRLYRRSRPGESGMANSL
AT1G02065.2	SPL8	SPL8 (SQUAMOSA PROMOTER BINDING PROTEIN-LIKE 8); DNA binding	156	FSAADDDFVSRLYRRSRPGESGMANSL
AT1G02110.1		proline-rich family protein	302	ELDRSFSKLRKTVYHSSSVF
AT1G02120.1	VAD1	VAD1 (VASCULAR ASSOCIATED DEATH1)	29	VVSDLPPSSPKGSPDRHDPSTSSPSPSRGGDNQSEVISKSE
AT1G02150.1		pentatricopeptide (PPR) repeat-containing protein	15	SSASYSRLLRCRSPVVSVAALSK
AT1G02270.1		endonuclease/exonuclease/phosphatase family protein / calcium-binding EF hand family protein	0	MQSHQNRSRLSLILRSRFIPSFS
AT1G02280.1	TOC33, ATTOC33, PPI1	TOC33 (TRANSLOCON AT THE OUTER ENVELOPE MEMBRANE OF CHLOROPLASTS 33); GTP binding / GTPase/ protein binding	172	TFSSKRSDSLLKTIRAGSKMRKQ
AT1G02280.2	TOC33, ATTOC33, PPI1	TOC33 (TRANSLOCON AT THE OUTER ENVELOPE MEMBRANE OF CHLOROPLASTS 33); GTP binding / GTPase/ protein binding	172	TFSSKRSDSLLKTIRAGSKMRKQ
AT1G02290.1		unknown protein	203	VKPVERNRSKSLTFPRSGSSKNSLK
AT1G02290.1		unknown protein	377	FKPRTVDRGSETTESKR
AT1G02340.1	HFR1, RSF1, FBI1, REP1	HFR1 (LONG HYPOCOTYL IN FAR-RED); DNA binding / protein binding / transcription factor	127	EFTREVPSVTRKGSKRRRRDEKMSNKMRKL
AT1G02380.1		unknown protein	126	KKSLKRLKAAKTSPSSP
AT1G02390.1	ATGPAT2, GPAT2	GPAT2 (GLYCEROL-3-PHOSPHATE ACYLTRANSFERASE 2); acyltransferase	209	GRRLIGITSFNSPSHRSL
AT1G02410.1		cytochrome c oxidase assembly protein CtaG / Cox11 family	40	KSNEHYLRSKRVFWGSSSSWSLNS
AT1G02475.1		FUNCTIONS IN: molecular_function unknown; INVOLVED IN: biological_process unknown; LOCATED IN: chloroplast; EXPRESSED IN: 22 plant structures; EXPRESSED DURING: 13 growth stages; CONTAINS InterPro DOMAIN/s: Streptomyces cyclase/dehydrase (InterPro:IPR005031); BEST Arabidopsis thaliana protein match is: unknown protein (TAIR:AT4G01883.1); Has 350 Blast hits to 350 proteins in 105 species: Archae -…	43	KTLNGFSSYSSSVSRRSRFIIPKRRRFSVSMEW
AT1G02520.1	PGP11	PGP11 (P-GLYCOPROTEIN 11); ATPase, coupled to transmembrane movement of substances	5	AREGDSVSHEPSTSKSPKEG
AT1G02520.1	PGP11	PGP11 (P-GLYCOPROTEIN 11); ATPase, coupled to transmembrane movement of substances	630	SSGSSFRNSNLKKSMEGTS
AT1G02530.1	PGP12	PGP12 (P-GLYCOPROTEIN 12); ATPase, coupled to transmembrane movement of substances	620	SGSSFRNSNLNISREGSVIS
AT1G02580.1	MEA, EMB173, FIS1, SDG5	MEA (MEDEA); sequence-specific DNA binding / transcription factor	398	TQRHNQVTKKVSRKSSRSVRKKSRLRKYARYPPA
AT1G02650.1		DNAJ heat shock N-terminal domain-containing protein	230	YSESIRHFSKIIDSRRGA
AT1G02650.1		DNAJ heat shock N-terminal domain-containing protein	390	LLNLRYKSERSMTSIDRFD
AT1G02700.1		unknown protein	114	QKRKNSTASPPSLDSVS
AT1G02730.1	ATCSLD5, CSLD5	ATCSLD5; 1,4-beta-D-xylan synthase/ cellulose synthase	46	LSSRATRRTSISSGNRRSNGDEGRYCSMSVED
AT1G02750.1		zinc ion binding	10	SGSSRSYRSETAAKYQS
AT1G02810.1		pectinesterase family protein	232	KAVYESLSRRKLADGDSNGDGDDGS
AT1G02810.1		pectinesterase family protein	59	IRKSLSQSRKFIRTVDRY
AT1G02840.1	SR1, ATSRP34, SRP34	SR1; RNA binding / nucleic acid binding / nucleotide binding	185	SNGYVRVREYDSRKDSRSPSRGRSYSKSRSRSRGRSVSRSRSRSRSRSRSPKAKSSRRSPAKSTSRSPGPRSKSRSPSPRRSRSRSRSPLPSVQKEGSKSPSKPSPAKSPIHTRSPS
AT1G02840.2	SR1, ATSRP34, SRP34	SR1; RNA binding / nucleic acid binding / nucleotide binding	185	SNGYVRVREYDSRKDSRSPSRGRSYSKSRSRSRGRSVSRSRSRSRSRSRSPKAKSSRRSPAKSTSRSPGPRSKSRSPSPRRWITVETLDH
AT1G02840.3	SR1, ATSRP34, SRP34	SR1; RNA binding / nucleic acid binding / nucleotide binding	185	SNGYVRVREYDSRKDSRSPSRGRSYSKSRSRSRGRSVSRSRSRSRSRSRSPKAKSSRRSPAKSTSRSPGPRSKSRSPSPRRSRSRSRSPLPSVQKEGSKSPSKPSPAKSPIHTRSPS
AT1G02850.1	BGLU11	BGLU11 (BETA GLUCOSIDASE 11); catalytic/ cation binding / hydrolase, hydrolyzing O-glycosyl compounds	438	KDPSLKRSPKLSAHWYSSFLKG
AT1G02850.2	BGLU11	BGLU11 (BETA GLUCOSIDASE 11); hydrolase, hydrolyzing O-glycosyl compounds	465	KDPSLKRSPKLSAHWYSSFLKG
AT1G02850.3	BGLU11	BGLU11 (BETA GLUCOSIDASE 11); catalytic/ cation binding / hydrolase, hydrolyzing O-glycosyl compounds	441	KDPSLKRSPKLSAHWYSSFLKG
AT1G02850.4	BGLU11	BGLU11 (BETA GLUCOSIDASE 11); catalytic/ cation binding / hydrolase, hydrolyzing O-glycosyl compounds	489	KDPSLKRSPKLSAHWYSSFLKG
AT1G02850.5	BGLU11	BGLU11 (BETA GLUCOSIDASE 11); catalytic/ cation binding / hydrolase, hydrolyzing O-glycosyl compounds	488	KDPSLKRSPKLSAHWYSSFLKG
AT1G02890.1		AAA-type ATPase family protein	537	TTKESSRRERLSVLAKRAVQ
AT1G02890.2		AAA-type ATPase family protein	537	TTKESSRRERLSVLAKRAVQ
AT1G02900.1	RALFL1, RALF1, ATRALF1	RALF1 (RAPID ALKALINIZATION FACTOR 1); signal transducer	77	SYQSLKRNSVPCSRRGAS
AT1G02960.1		unknown protein	246	RLIKRSSELDSRHEAKSRKFT
AT1G02960.2		unknown protein	246	RLIKRSSELDSRHEAKSRKFT
AT1G02960.3		unknown protein	246	RLIKRSSELDSRHEAKSRKFT
AT1G02990.1		FUNCTIONS IN: molecular_function unknown; INVOLVED IN: biological_process unknown; LOCATED IN: cellular_component unknown; BEST Arabidopsis thaliana protein match is: zinc ion binding (TAIR:AT3G62900.1); Has 5071 Blast hits to 3731 proteins in 313 species: Archae - 10; Bacteria - 271; Metazoa - 2187; Fungi - 266; Plants - 194; Viruses - 11; Other Eukaryotes - 2132 (source: NCBI BLink).	40	GYGSFLSMYQRSPVCSRPKTSPE
AT1G02990.1		FUNCTIONS IN: molecular_function unknown; INVOLVED IN: biological_process unknown; LOCATED IN: cellular_component unknown; BEST Arabidopsis thaliana protein match is: zinc ion binding (TAIR:AT3G62900.1); Has 5071 Blast hits to 3731 proteins in 313 species: Archae - 10; Bacteria - 271; Metazoa - 2187; Fungi - 266; Plants - 194; Viruses - 11; Other Eukaryotes - 2132 (source: NCBI BLink).	417	LKSKLPKVQRSQKGSSSI
AT1G02990.1		FUNCTIONS IN: molecular_function unknown; INVOLVED IN: biological_process unknown; LOCATED IN: cellular_component unknown; BEST Arabidopsis thaliana protein match is: zinc ion binding (TAIR:AT3G62900.1); Has 5071 Blast hits to 3731 proteins in 313 species: Archae - 10; Bacteria - 271; Metazoa - 2187; Fungi - 266; Plants - 194; Viruses - 11; Other Eukaryotes - 2132 (source: NCBI BLink).	572	LSGVSKKPKTGKSRFSA
AT1G02990.1		FUNCTIONS IN: molecular_function unknown; INVOLVED IN: biological_process unknown; LOCATED IN: cellular_component unknown; BEST Arabidopsis thaliana protein match is: zinc ion binding (TAIR:AT3G62900.1); Has 5071 Blast hits to 3731 proteins in 313 species: Archae - 10; Bacteria - 271; Metazoa - 2187; Fungi - 266; Plants - 194; Viruses - 11; Other Eukaryotes - 2132 (source: NCBI BLink).	828	EGDSKQKSREEESSAPSKDN
AT1G02990.1		FUNCTIONS IN: molecular_function unknown; INVOLVED IN: biological_process unknown; LOCATED IN: cellular_component unknown; BEST Arabidopsis thaliana protein match is: zinc ion binding (TAIR:AT3G62900.1); Has 5071 Blast hits to 3731 proteins in 313 species: Archae - 10; Bacteria - 271; Metazoa - 2187; Fungi - 266; Plants - 194; Viruses - 11; Other Eukaryotes - 2132 (source: NCBI BLink).	887	DSREYQDPNTKLDRSGSHFSSRQKPDTAN
AT1G02990.2		FUNCTIONS IN: molecular_function unknown; INVOLVED IN: biological_process unknown; LOCATED IN: cellular_component unknown; BEST Arabidopsis thaliana protein match is: zinc ion binding (TAIR:AT3G62900.1); Has 5176 Blast hits to 3822 proteins in 317 species: Archae - 10; Bacteria - 289; Metazoa - 2234; Fungi - 277; Plants - 207; Viruses - 11; Other Eukaryotes - 2148 (source: NCBI BLink).	40	GYGSFLSMYQRSPVCSRPKTSPE
AT1G02990.2		FUNCTIONS IN: molecular_function unknown; INVOLVED IN: biological_process unknown; LOCATED IN: cellular_component unknown; BEST Arabidopsis thaliana protein match is: zinc ion binding (TAIR:AT3G62900.1); Has 5176 Blast hits to 3822 proteins in 317 species: Archae - 10; Bacteria - 289; Metazoa - 2234; Fungi - 277; Plants - 207; Viruses - 11; Other Eukaryotes - 2148 (source: NCBI BLink).	417	LKSKLPKVQRSQKGSSSI
AT1G02990.2		FUNCTIONS IN: molecular_function unknown; INVOLVED IN: biological_process unknown; LOCATED IN: cellular_component unknown; BEST Arabidopsis thaliana protein match is: zinc ion binding (TAIR:AT3G62900.1); Has 5176 Blast hits to 3822 proteins in 317 species: Archae - 10; Bacteria - 289; Metazoa - 2234; Fungi - 277; Plants - 207; Viruses - 11; Other Eukaryotes - 2148 (source: NCBI BLink).	572	LSGVSKKPKTGKSRFSA
AT1G02990.2		FUNCTIONS IN: molecular_function unknown; INVOLVED IN: biological_process unknown; LOCATED IN: cellular_component unknown; BEST Arabidopsis thaliana protein match is: zinc ion binding (TAIR:AT3G62900.1); Has 5176 Blast hits to 3822 proteins in 317 species: Archae - 10; Bacteria - 289; Metazoa - 2234; Fungi - 277; Plants - 207; Viruses - 11; Other Eukaryotes - 2148 (source: NCBI BLink).	828	EGDSKQKSREEESSAPSKDN
AT1G02990.2		FUNCTIONS IN: molecular_function unknown; INVOLVED IN: biological_process unknown; LOCATED IN: cellular_component unknown; BEST Arabidopsis thaliana protein match is: zinc ion binding (TAIR:AT3G62900.1); Has 5176 Blast hits to 3822 proteins in 317 species: Archae - 10; Bacteria - 289; Metazoa - 2234; Fungi - 277; Plants - 207; Viruses - 11; Other Eukaryotes - 2148 (source: NCBI BLink).	887	DSREYQDPNTKLDRSGSHFSSRQKPDTAN
AT1G03010.1		phototropic-responsive NPH3 family protein	613	SGKASSESRFLFQRKRRHSV
AT1G03050.1		epsin N-terminal homology (ENTH) domain-containing protein / clathrin assembly protein-related	117	TRLLNMSDFRDVSRSNSWDYSA
AT1G03050.1		epsin N-terminal homology (ENTH) domain-containing protein / clathrin assembly protein-related	322	RDKSALEHTKQSKSVKS
AT1G03055.1		unknown protein	18	FNDTRSGLDRRSSISPTLCSKPVYS
AT1G03055.2		unknown protein	18	FNDTRSGLDRRSSISPTLCSKPVYS
AT1G03060.1		WD-40 repeat family protein / beige-related	1517	LSLSRFRYDSSSVGSHGDMD
AT1G03060.1		WD-40 repeat family protein / beige-related	454	GRASRSSQTKPTGHSRSRTSS
AT1G03060.1		WD-40 repeat family protein / beige-related	638	YSGVSSHSDRKPSSGSFRKNLDTKD
AT1G03080.1		FUNCTIONS IN: molecular_function unknown; INVOLVED IN: biological_process unknown; LOCATED IN: plasma membrane; EXPRESSED IN: 22 plant structures; EXPRESSED DURING: 13 growth stages; CONTAINS InterPro DOMAIN/s: Prefoldin (InterPro:IPR009053), KIP1-like (InterPro:IPR011684); BEST Arabidopsis thaliana protein match is: kinase interacting family protein (TAIR:AT3G22790.1); Has 169162 Blast hits to 6…	1449	KLAMEELKTSSARRSRRRNGSLRKQNHEIYSE
AT1G03080.1		FUNCTIONS IN: molecular_function unknown; INVOLVED IN: biological_process unknown; LOCATED IN: plasma membrane; EXPRESSED IN: 22 plant structures; EXPRESSED DURING: 13 growth stages; CONTAINS InterPro DOMAIN/s: Prefoldin (InterPro:IPR009053), KIP1-like (InterPro:IPR011684); BEST Arabidopsis thaliana protein match is: kinase interacting family protein (TAIR:AT3G22790.1); Has 169162 Blast hits to 6…	1629	ERSDGSKSSMDLDENESSRRRRISE
AT1G03080.1		FUNCTIONS IN: molecular_function unknown; INVOLVED IN: biological_process unknown; LOCATED IN: plasma membrane; EXPRESSED IN: 22 plant structures; EXPRESSED DURING: 13 growth stages; CONTAINS InterPro DOMAIN/s: Prefoldin (InterPro:IPR009053), KIP1-like (InterPro:IPR011684); BEST Arabidopsis thaliana protein match is: kinase interacting family protein (TAIR:AT3G22790.1); Has 169162 Blast hits to 6…	8	SKRYSWWWDSHISPKNSK
AT1G03160.1	FZL	FZL (FZO-LIKE); GTP binding / GTPase/ thiamin-phosphate diphosphorylase	29	KLSSFTPPRHRRFSSLSIRNISHES
AT1G03160.2	FZL	FZL (FZO-LIKE); GTP binding / GTPase/ thiamin-phosphate diphosphorylase	29	KLSSFTPPRHRRFSSLSIRNISHES
AT1G03200.1		unknown protein	0	MKIRSKSKGYRQEIKSTCTD
AT1G03230.1		extracellular dermal glycoprotein, putative / EDGP, putative	80	TYRSPRCNSAVCSRAGSIA
AT1G03240.1		unknown protein	0	MTIRSKKSKGYRQEIKSTCA
AT1G03280.1		transcription initiation factor IIE (TFIIE) alpha subunit family protein / general transcription factor TFIIE family protein	30	YTTKSDNQQKSARSDNRGIA
AT1G03300.1		agenet domain-containing protein	396	ENSKDGSTKRKREEKHNSAS
AT1G03310.1	ATISA2, ISA2, DBE1, BE2	isoamylase, putative / starch debranching enzyme, putative	330	VGKSVSQKYLGSLSKSPSFD
AT1G03310.2	ATISA2, ISA2, DBE1, BE2	isoamylase, putative / starch debranching enzyme, putative	330	VGKSVSQKYLGSLSKSPSFD
AT1G03350.1		BSD domain-containing protein	126	SDSSDNNSSQSFGRRDSFSSKPYSRFDAQ
AT1G03350.1		BSD domain-containing protein	425	KETSRSGGSPNRAELRKRLSA
AT1G03370.1		protein binding / zinc ion binding	1736	VYERQTYYRDKRISRYRGEV
AT1G03370.1		protein binding / zinc ion binding	416	PARSVKSASKKKTGSESVT
AT1G03380.1	ATATG18G	AtATG18g	148	SFSQNGSLARDGSSDSK
AT1G03380.1	ATATG18G	AtATG18g	176	RFYSLRSHSYVYVLRFRSSV
AT1G03410.1	2A6	2A6; oxidoreductase	26	CALQKKERRSKMESSDRSSQAKAF
AT1G03470.1		kinase interacting family protein	67	EFYRSHRSLAERYDLLRPSSVHKHGSDSESHEKSS
AT1G03470.2		kinase interacting family protein	67	EFYRSHRSLAERYDLLRPSSVHKHGSDSESHEKSS
AT1G03475.1	LIN2, HEMF1, ATCPO-I	LIN2 (LESION INITIATION 2); coproporphyrinogen oxidase	18	SHRLHYSPNPSTLRFSR
AT1G03560.1		pentatricopeptide (PPR) repeat-containing protein	33	SDDSKCSPLSSSRTSVR
AT1G03610.1		unknown protein	113	EGRDPFSDSGSDESVSE
AT1G03680.1	ATHM1, TRX-M1, ATM1	ATHM1; enzyme activator	40	SGLRTRVSLSSLSKNSRVSRLRRGVICEA
AT1G03687.1		FUNCTIONS IN: molecular_function unknown; INVOLVED IN: biological_process unknown; EXPRESSED IN: 20 plant structures; EXPRESSED DURING: 11 growth stages; CONTAINS InterPro DOMAIN/s: DTW (InterPro:IPR005636); Has 347 Blast hits to 347 proteins in 176 species: Archae - 0; Bacteria - 320; Metazoa - 0; Fungi - 0; Plants - 10; Viruses - 0; Other Eukaryotes - 17 (source: NCBI BLink).	355	LDSLTGRRLRMGRSITRKGRNTISM
AT1G03730.1		unknown protein	1	MDPTGSPRTSNGSPPRSYLIF
AT1G03740.1		ATP binding / kinase/ protein kinase/ protein serine/threonine kinase	2	CVNSRHRPFRRKSTTLKESSEEKRSSRIDSSRRIDDW
AT1G03740.1		ATP binding / kinase/ protein kinase/ protein serine/threonine kinase	565	MEKQYKDLRSRNDSFKSFKEERTPHGP
AT1G03740.2		ATP binding / kinase/ protein kinase/ protein serine/threonine kinase/ protein tyrosine kinase	2	CVNSRHRPFRRKSTTLKESSEEKRSSRIDSSRRIDDW
AT1G03740.2		ATP binding / kinase/ protein kinase/ protein serine/threonine kinase/ protein tyrosine kinase	565	MEKQYKDLRSRNDSFKSFKEERTPHGP
AT1G03760.1		prefoldin subunit family protein	373	SSTSQPSKPVSRFRAKR
AT1G03770.1	ATRING1B, RING1B	RING1B (RING 1B); protein binding / zinc ion binding	205	VKRKSVGKGTAILSRSRRSGGGSRRRRNCRNIEQDTSEA
AT1G03790.1	SOM	SOM (SOMNUS); nucleic acid binding / transcription factor	21	LLLSSKSFPSDSSSPRSPRKHNWNKSNKITSE
AT1G03790.1	SOM	SOM (SOMNUS); nucleic acid binding / transcription factor	220	GNLSHLSRSPSLSPPMSPANKAA
AT1G03820.1		unknown protein	176	DTRGRNSENTPSRGYEN
AT1G03830.1		guanylate-binding family protein	914	DSVSQESRKVRTMTPRRC
AT1G03850.1		glutaredoxin family protein	37	SWLTSGSPKPTSISNKRSSNLV
AT1G03850.2		glutaredoxin family protein	37	SWLTSGSPKPTSISNKRSSNLV
AT1G03890.1		cupin family protein	289	RSDHFSTRAGRISTLNS
AT1G03910.1		EXPRESSED IN: 25 plant structures; EXPRESSED DURING: 13 growth stages; CONTAINS InterPro DOMAIN/s: Cactin, central region (InterPro:IPR018816); BEST Arabidopsis thaliana protein match is: unknown protein (TAIR:AT2G36815.2); Has 11516 Blast hits to 6722 proteins in 356 species: Archae - 23; Bacteria - 259; Metazoa - 6122; Fungi - 1009; Plants - 493; Viruses - 33; Other Eukaryotes - 3577 (source: N…	5	KGKRDRSGRQKKRRDESESGSESESYTSDSDGSDDLSPPRSSRRKKGSSSRRTRRRSSSDDSSDSDGGRKSKKRSSSKDYSEEKV
AT1G03920.1		protein kinase, putative	299	AGSGGGSESVSTTPKRS
AT1G03920.1		protein kinase, putative	513	ELKKKESKSKRPSVKSLFESESDS
AT1G03930.1	ADK1, CKL9ALPHA, CKL9BETA	ADK1 (dual specificity kinase 1); kinase/ protein serine/threonine/tyrosine kinase	346	FSRRHPATSTTRDRSASRNSVDGPLSKHPPGDSERPRSSSRYGSSSRRAIPSSSRPSSAGGPSDSRSSSRL
AT1G03930.1	ADK1, CKL9ALPHA, CKL9BETA	ADK1 (dual specificity kinase 1); kinase/ protein serine/threonine/tyrosine kinase	439	GNESRTSSFSRAARNTREDPLRRSLE
AT1G03960.1		calcium-binding EF hand family protein	78	STPPLSPRSSSGSPRFSRQRTSPPSLHSPLRSLKEPKRQL
AT1G03970.1	GBF4	GBF4; DNA binding / sequence-specific DNA binding / transcription factor	2	SFKLMSSSNSDLSRRNSSSASSSPSIRSSH
AT1G03982.1		FUNCTIONS IN: molecular_function unknown; INVOLVED IN: biological_process unknown; LOCATED IN: cellular_component unknown; CONTAINS InterPro DOMAIN/s: PAK-box/P21-Rho-binding (InterPro:IPR000095); BEST Arabidopsis thaliana protein match is: RIC6 (ROP-INTERACTIVE CRIB MOTIF-CONTAINING PROTEIN 6) (TAIR:AT2G20430.1); Has 96 Blast hits to 96 proteins in 15 species: Archae - 0; Bacteria - 0; Metazoa -…	125	IPQDGGFNKKSRRKKSKDCVDGGSRRSSRRVRGSQVESISDSSS
AT1G03982.1		FUNCTIONS IN: molecular_function unknown; INVOLVED IN: biological_process unknown; LOCATED IN: cellular_component unknown; CONTAINS InterPro DOMAIN/s: PAK-box/P21-Rho-binding (InterPro:IPR000095); BEST Arabidopsis thaliana protein match is: RIC6 (ROP-INTERACTIVE CRIB MOTIF-CONTAINING PROTEIN 6) (TAIR:AT2G20430.1); Has 96 Blast hits to 96 proteins in 15 species: Archae - 0; Bacteria - 0; Metazoa -…	69	EDSTRSRDIPRLPKSSRERSSTLGGSPTKERSRRRGSSQYNGNPKVSRRSSKES
AT1G04020.1	ATBARD1, BARD1	BARD1 (BREAST CANCER ASSOCIATED RING 1); DNA binding / transcription coactivator	130	DVSKRSGGTDSSSRDGSPL
AT1G04020.2	ATBARD1, BARD1	BARD1 (BREAST CANCER ASSOCIATED RING 1); DNA binding / transcription coactivator	130	DVSKRSGGTDSSSRDGSPL
AT1G04030.1		unknown protein	337	KQFSATSTPRKSPSKSPDETPII
AT1G04050.1	SUVR1, SDG13	SUVR1 (ARABIDOPSIS HOMOLOG OF SU(VAR)3-9 1); histone-lysine N-methyltransferase/ zinc ion binding	107	DEFPLKRRLRSRRGRASSSSSSSSS
AT1G04100.1	IAA10	IAA10; transcription factor	66	SSLTRESGTKRSADSSP
AT1G04140.1		transducin family protein / WD-40 repeat family protein	494	YGVSARGDSRDRILQSRFAGSGLAEGRSSRNT
AT1G04140.2		transducin family protein / WD-40 repeat family protein	494	YGVSARGDSRDRILQSRFAGSGLAEGRSSRNT
AT1G04150.1		C2 domain-containing protein	149	NRSGGSKKSKKVQNVSSS
AT1G04210.1		leucine-rich repeat family protein / protein kinase family protein	321	SSISRCFSARKSSKRWKRRQYYFQ
AT1G04210.1		leucine-rich repeat family protein / protein kinase family protein	462	DYNSSSERKKPNNKSKRCSEKY
AT1G04210.1		leucine-rich repeat family protein / protein kinase family protein	657	ILSDVCEKSLRSIKSKRNSIVVPLG
AT1G04230.1		unknown protein	146	VSLFSGSDDLQVSERRSKLRKQIK
AT1G04230.1		unknown protein	255	PRSRFASTSRQYSSVKRN
AT1G04230.1		unknown protein	299	SSNLSSNSDAHKPKRKRRPKKK
AT1G04230.1		unknown protein	5	YARRRVAERKTTAGTSRRSKGLRVEK
AT1G04230.1		unknown protein	95	RRKIERSIRRLEKLHRSTSGGY
AT1G04240.1	SHY2, IAA3	SHY2 (SHORT HYPOCOTYL 2); transcription factor	45	KEIESSSRKTETSPPRK
AT1G04310.1	ERS2	ERS2 (ETHYLENE RESPONSE SENSOR 2); ethylene binding / glycogen synthase kinase 3/ protein histidine kinase/ receptor	267	MLSPGSVLASVTSRGKSG
AT1G04310.1	ERS2	ERS2 (ETHYLENE RESPONSE SENSOR 2); ethylene binding / glycogen synthase kinase 3/ protein histidine kinase/ receptor	619	RRSMMSRGGGYSGETFR
AT1G04330.1		unknown protein	1	SSTARNISGSGNRKSSRL
AT1G04360.1		zinc finger (C3HC4-type RING finger) family protein	189	ISAPSSPRENSPHSRNRNLEPG
AT1G04360.1		zinc finger (C3HC4-type RING finger) family protein	352	SRVMKRCFFSFGSSRTSKSSS
AT1G04430.1		dehydration-responsive protein-related	44	GRSLRKLGSSYLSGDDD
AT1G04430.2		dehydration-responsive protein-related	44	GRSLRKLGSSYLSGDDD
AT1G04440.1	CKL13	CKL13 (CASEIN KINASE LIKE 13); ATP binding / kinase/ protein kinase/ protein serine/threonine kinase	382	NSLSRNLSSSRKAIAGSSVR
AT1G04450.1	RIC3	RIC3 (ROP-INTERACTIVE CRIB MOTIF-CONTAINING PROTEIN 3); protein binding	118	SASDMQPKNTRRHHRSRHGSIDSSNDPSVRRRRVVSVTTNDMEGSYPLSDSSTHSRKSTSRHRKPKGSGGGEL
AT1G04450.1	RIC3	RIC3 (ROP-INTERACTIVE CRIB MOTIF-CONTAINING PROTEIN 3); protein binding	89	TDKPKHKKTRRKSETVSQNGSPPRRNSS
AT1G04470.1		FUNCTIONS IN: molecular_function unknown; INVOLVED IN: biological_process unknown; LOCATED IN: cellular_component unknown; EXPRESSED IN: male gametophyte, pollen tube; EXPRESSED DURING: L mature pollen stage, M germinated pollen stage; CONTAINS InterPro DOMAIN/s: Munc13 homology 1 (InterPro:IPR014770), Protein of unknown function DUF810 (InterPro:IPR008528), Munc13 homology 2 (InterPro:IPR014772)…	114	LKMLKRSPSRRMSTVGT
AT1G04540.1		C2 domain-containing protein	105	RRPGYRTSNNEYRRTPP
AT1G04540.1		C2 domain-containing protein	185	LNSNKGSSKNPQSPSSRQYQSVISRPELRRTKSDTSSMVVSDLLSRAERSRLA
AT1G04540.1		C2 domain-containing protein	325	KTRIEKQRSVKDYDRGRASPYLSKHGTPLRSN
AT1G04540.1		C2 domain-containing protein	394	RTPMRSNMVGSTPMRSN
AT1G04540.1		C2 domain-containing protein	526	GGMSSRRKTPTTKKHNRRHTD
AT1G04550.1	IAA12, BDL	IAA12 (AUXIN-INDUCED PROTEIN 12); transcription factor/ transcription repressor	50	KRSAESSSHQGASPPRS
AT1G04550.2	IAA12, BDL	IAA12 (AUXIN-INDUCED PROTEIN 12); transcription factor/ transcription repressor	50	KRSAESSSHQGASPPRS
AT1G04590.1		FUNCTIONS IN: molecular_function unknown; EXPRESSED IN: 23 plant structures; EXPRESSED DURING: 13 growth stages; BEST Arabidopsis thaliana protein match is: emb1417 (embryo defective 1417) (TAIR:AT4G21190.1); Has 54 Blast hits to 54 proteins in 8 species: Archae - 0; Bacteria - 0; Metazoa - 0; Fungi - 0; Plants - 52; Viruses - 0; Other Eukaryotes - 2 (source: NCBI BLink).	313	HLLLGTPSDDKPSRSSRKKKKPELRIP
AT1G04590.2		FUNCTIONS IN: molecular_function unknown; EXPRESSED IN: 23 plant structures; EXPRESSED DURING: 13 growth stages; BEST Arabidopsis thaliana protein match is: pentatricopeptide (PPR) repeat-containing protein (TAIR:AT4G18975.3); Has 54 Blast hits to 54 proteins in 8 species: Archae - 0; Bacteria - 0; Metazoa - 0; Fungi - 0; Plants - 52; Viruses - 0; Other Eukaryotes - 2 (source: NCBI BLink).	316	HLLLGTPSDDKPSRSSRKKKKPELRIP
AT1G04600.1	XIA, ATXIA	XIA (MYOSIN XI A); motor/ protein binding	1473	KSSEENSPKKSSEENSPKESSGDKSPQKLSDDNSPSKEGQ
AT1G04778.1		unknown protein	29	PSPASLAVSKATSRSRRRPRKALNRG
AT1G04780.1		ankyrin repeat family protein	459	RGLRDSSKASTSEGSGSSKRKEGNKENE
AT1G04790.1		zinc finger (C3HC4-type RING finger) family protein	308	ERESRQQRRRKNGFTTST
AT1G04790.1		zinc finger (C3HC4-type RING finger) family protein	58	DNRESSDTRTESGHRPRAS
AT1G04840.1		pentatricopeptide (PPR) repeat-containing protein	73	KSPDYSLSIFRNSEERN
AT1G04860.1	UBP2, ATUBP2	UBP2 (UBIQUITIN-SPECIFIC PROTEASE 2); ubiquitin-specific protease	738	LKLQRLREKRKSNEDESRSSNTSNG
AT1G04890.1		FUNCTIONS IN: molecular_function unknown; INVOLVED IN: biological_process unknown; LOCATED IN: cellular_component unknown; CONTAINS InterPro DOMAIN/s: Intermediate filament protein, conserved site (InterPro:IPR018039), Protein of unknown function DUF593 (InterPro:IPR007656); BEST Arabidopsis thaliana protein match is: unknown protein (TAIR:AT4G13630.1); Has 6609 Blast hits to 4661 proteins in 382…	19	LKNHRRSGRVNCASLRSISSS
AT1G04890.1		FUNCTIONS IN: molecular_function unknown; INVOLVED IN: biological_process unknown; LOCATED IN: cellular_component unknown; CONTAINS InterPro DOMAIN/s: Intermediate filament protein, conserved site (InterPro:IPR018039), Protein of unknown function DUF593 (InterPro:IPR007656); BEST Arabidopsis thaliana protein match is: unknown protein (TAIR:AT4G13630.1); Has 6609 Blast hits to 4661 proteins in 382…	326	PPLCRPRKKSLSSSGSRRKSMSAVDYERLKIE
AT1G04890.1		FUNCTIONS IN: molecular_function unknown; INVOLVED IN: biological_process unknown; LOCATED IN: cellular_component unknown; CONTAINS InterPro DOMAIN/s: Intermediate filament protein, conserved site (InterPro:IPR018039), Protein of unknown function DUF593 (InterPro:IPR007656); BEST Arabidopsis thaliana protein match is: unknown protein (TAIR:AT4G13630.1); Has 6609 Blast hits to 4661 proteins in 382…	386	LPSKVRATSEKRSWTRSCSMDLHS
AT1G04900.1		unknown protein	377	WRKMEKDGTPSKKGRKRRTLTLDTSA
AT1G04900.1		unknown protein	58	YFSQRSKSVGVLERSIK
AT1G04930.1		hydroxyproline-rich glycoprotein family protein	186	PPTSILDTSRNRKARSKDGA
AT1G04980.1	ATPDIL2-2, ATPDI10, PDI10	ATPDIL2-2 (PDI-LIKE 2-2); protein disulfide isomerase	246	GSDKSSPVPYEGARSAS
AT1G04990.1		zinc finger (CCCH-type) family protein	354	TTHQRISPTPNRSDSKSLSNGKP
AT1G04990.2		zinc finger (CCCH-type) family protein	354	TTHQRISPTPNRSDSKSLSNGKP
AT1G05020.1		epsin N-terminal homology (ENTH) domain-containing protein / clathrin assembly protein-related	178	NSTTRSRFNPKAGIKSH
AT1G05020.1		epsin N-terminal homology (ENTH) domain-containing protein / clathrin assembly protein-related	368	DTSERYSDYGSFRSTSL
AT1G05030.1		hexose transporter, putative	20	SYPTRLAHSRKASSFSRFFRSSKRKKRVTTLSTKKP
AT1G05040.1		unknown protein	48	KIRATPRRVNEWRERSRSPLRRRYSTTSVSEFTLKMR
AT1G05040.2		unknown protein	48	KIRATPRRVNEWRERSRSPLRRRYSTTSVSEFTLKMR
AT1G05065.1	CLE20	CLE20 (CLAVATA3/ESR-RELATED 20); protein binding / receptor binding	25	LSKASRIHVERRRFSSKPS
AT1G05120.1		SNF2 domain-containing protein / helicase domain-containing protein / RING finger domain-containing protein	291	KTAKQSKQKRKKTSDSS
AT1G05170.1		galactosyltransferase family protein	0	MSAKIKGEYSSRSFVSRKWT
AT1G05170.2		galactosyltransferase family protein	0	MSAKIKGEYSSRSFVSRKWT
AT1G05200.1	ATGLR3.4, GLR3.4, GLUR3	ATGLR3.4; intracellular ligand-gated ion channel	891	ADEERAGEVSEPSRSGRGSRAPSFKELIKV
AT1G05200.2	ATGLR3.4, GLR3.4, GLUR3	ATGLR3.4; intracellular ligand-gated ion channel	891	ADEERAGEVSEPSRSGRGSRAPSFKELIKV
AT1G05280.1		fringe-related protein	126	VSQDTSRFRYTWRGGDRN
AT1G05290.1		transcription factor	324	KQIRYESRKSTADTKKRMKGRFT
AT1G05370.1		FUNCTIONS IN: molecular_function unknown; INVOLVED IN: biological_process unknown; LOCATED IN: cellular_component unknown; EXPRESSED IN: shoot apex, hypocotyl, flower, seed; EXPRESSED DURING: petal differentiation and expansion stage, E expanded cotyledon stage; CONTAINS InterPro DOMAIN/s: Cellular retinaldehyde-binding/triple function, C-terminal (InterPro:IPR001251), Phosphatidylinositol transf…	313	SPLNARSFSFASPAARS
AT1G05380.1		DNA binding	125	LMRKRFDNGSVGVRGRSSFASRRVDSSVGRSGSGREGL
AT1G05380.1		DNA binding	252	VDNNSESEESDMSRKSKRKKSEYSKPKKEFNTKSKS
AT1G05380.1		DNA binding	36	TRQNYQKRSRMVVSDSESSDEFMKPPPRRS
AT1G05380.1		DNA binding	457	LHKKSKRSLYYNNARPSCGSDSHYLHGRKTK
AT1G05380.1		DNA binding	4	GGSGERSRIASNTPRSLKEKSDGVGRTVSS
AT1G05380.2		DNA binding	125	LMRKRFDNGSVGVRGRSSFASRRVDSSVGRSGSGREGL
AT1G05380.2		DNA binding	252	VDNNSESEESDMSRKSKRKKSEYSKPKKEFNTKSKS
AT1G05380.2		DNA binding	36	TRQNYQKRSRMVVSDSESSDEFMKPPPRRS
AT1G05380.2		DNA binding	457	LHKKSKRSLYYNNARPSCGSDSHYLHGRKTK
AT1G05380.2		DNA binding	4	GGSGERSRIASNTPRSLKEKSDGVGRTVSS
AT1G05460.1	SDE3	SDE3 (SILENCING DEFECTIVE); RNA helicase	167	DKISSSLTSNRPYSRSRRAPKKDFAVDD
AT1G05470.1	CVP2	CVP2 (COTYLEDON VASCULAR PATTERN 2); hydrolase/ inositol trisphosphate phosphatase	188	FSGSTRQKNSTFFHRRSFQTPS
AT1G05470.1	CVP2	CVP2 (COTYLEDON VASCULAR PATTERN 2); hydrolase/ inositol trisphosphate phosphatase	237	RPSDFDPSFRGSSSSHRPSDYSRRPSDYSRRPSDYSRRPSDYSRRPSDSRPSDYSRPSDYYSRPSDYSRPSDFSRSSDDDNG
AT1G05470.1	CVP2	CVP2 (COTYLEDON VASCULAR PATTERN 2); hydrolase/ inositol trisphosphate phosphatase	515	PPTYKYSRNSDRYSGDDLHPKEKRRTPA
AT1G05470.1	CVP2	CVP2 (COTYLEDON VASCULAR PATTERN 2); hydrolase/ inositol trisphosphate phosphatase	557	LSYVRGESRFSDHRPVYG
AT1G05490.1	chr31	chr31 (chromatin remodeling 31); ATP binding / DNA binding / helicase/ nucleic acid binding	335	RKALVRYKRSGSSLTKPRERDNKIQ
AT1G05500.1	SYTE, ATSYTE, NTMC2TYPE2.1, NTMC2T2.1	NTMC2T2.1	462	SMKKSGAKSKTRVVNDS
AT1G05570.1	CALS1, GSL06, ATGSL6, ATGSL06, GSL6	CALS1 (CALLOSE SYNTHASE 1); 1,3-beta-glucan synthase/ transferase, transferring glycosyl groups	388	YQTISKEAKRSRGGKSKHSVWRNYDD
AT1G05575.1		unknown protein	30	SVFSTSKTMKRAYSFRSARSISIRRILAV
AT1G05630.1	AT5PTASE13, 5PTASE13	5PTASE13; inositol or phosphatidylinositol phosphatase	1103	RGSCSTTLRSHSVKVRH
AT1G05630.1	AT5PTASE13, 5PTASE13	5PTASE13; inositol or phosphatidylinositol phosphatase	1150	TRNGSTRPRTEDSVRRGKS
AT1G05630.2	AT5PTASE13, 5PTASE13	5PTASE13; inositol or phosphatidylinositol phosphatase	1069	RGSCSTTLRSHSVKVRH
AT1G05630.2	AT5PTASE13, 5PTASE13	5PTASE13; inositol or phosphatidylinositol phosphatase	1116	TRNGSTRPRTEDSVRRGKS
AT1G05640.1		ankyrin repeat family protein	581	VMHRIEESKLKSLRKERSKSKSFSLSHMPSESEI
AT1G05670.1		UDP-glucoronosyl/UDP-glucosyl transferase family protein	459	FLFRDREREKQKSRGLSFSTLT
AT1G05670.2		UDP-glucoronosyl/UDP-glucosyl transferase family protein	459	FLFRDREREKQKSRGLSFSTLT
AT1G05700.1		leucine-rich repeat protein kinase, putative	698	KLADFGLSRSFHTESRSHVSTLVAG
AT1G05710.1		ethylene-responsive protein, putative	18	SLGESSIKRHKSDLSFSSKERKDKV
AT1G05710.2		ethylene-responsive protein, putative	18	SLGESSIKRHKSDLSFSSKERKDKV
AT1G05710.3		ethylene-responsive protein, putative	18	SLGESSIKRHKSDLSFSSKERKDKV
AT1G05710.4		ethylene-responsive protein, putative	18	SLGESSIKRHKSDLSFSSKERKDKV
AT1G05805.1		basic helix-loop-helix (bHLH) family protein	129	GGNSSGSYSLARQRSSPADF
AT1G05805.1		basic helix-loop-helix (bHLH) family protein	166	SDYSPQGGSNGGRGHSR
AT1G05830.1	ATX2, SDG30	ATX2 (ARABIDOPSIS TRITHORAX-LIKE PROTEIN 2); DNA binding / histone methyltransferase(H3-K4 specific)	171	KAVCSGNKQDGSSRSKRNTVKNQ
AT1G05830.2	ATX2	ATX2 (ARABIDOPSIS TRITHORAX-LIKE PROTEIN 2); DNA binding / histone methyltransferase(H3-K4 specific)	171	KAVCSGNKQDGSSRSKRNTVKNQ
AT1G05870.1		unknown protein	30	WVEISSRRSFVAGEGSRKKLERKKS
AT1G05870.2		unknown protein	30	WVEISSRRSFVAGEGSRKKLERKKS
AT1G05894.1		unknown protein	111	SPTSLLEERRLSVSFRFSVDESVVS
AT1G05894.1		unknown protein	357	IRNCVKRNKSLPSRLRNSSKTCSKV
AT1G05900.1	ATNTH2	endonuclease-related	33	KSISAESLNLRSDSNSE
AT1G05900.2	ATNTH2	endonuclease-related	33	KSISAESLNLRSDSNSE
AT1G05910.1		cell division cycle protein 48-related / CDC48-related	113	YRTLRRRVHKNFSTSKSRKDMD
AT1G05910.1		cell division cycle protein 48-related / CDC48-related	145	RPRRSTTIANKRLKTES
AT1G05910.1		cell division cycle protein 48-related / CDC48-related	270	RDGRRGGSRPHKRHRFTRTDDSDDSL
AT1G05910.1		cell division cycle protein 48-related / CDC48-related	76	PIASDLRRSTRKRRISVNLEDYT
AT1G05910.1		cell division cycle protein 48-related / CDC48-related	7	QGDGSVTKPVRTSDRLRRRPKLHGRSYLYYSSPNMLHNRKRNTKTRTA
AT1G05940.1	CAT9	CAT9 (CATIONIC AMINO ACID TRANSPORTER 9); cationic amino acid transmembrane transporter	18	SHFRASALRSKSLPPPS
AT1G06100.1		fatty acid desaturase family protein	4	TKDDGSSQKKSVRKEKRAY
AT1G06130.1	GLX2-4	GLX2-4 (glyoxalase 2-4); hydrolase/ hydroxyacylglutathione hydrolase/ zinc ion binding	47	SSPLRTLRDAGKSVRISRFCSVSNVS
AT1G06130.2	GLX2-4	GLX2-4 (glyoxalase 2-4); hydrolase/ hydroxyacylglutathione hydrolase/ zinc ion binding	46	SSPLRTLRDAGKSVRISRFCSVSNVS
AT1G06145.1	EMB1444	EMB1444 (EMBRYO DEFECTIVE 1444)	108	RSLELYVRMLRDSVSPS
AT1G06160.1	ORA59	ORA59 (OCTADECANOID-RESPONSIVE ARABIDOPSIS AP2/ERF 59); DNA binding / transcription activator/ transcription factor	164	LKRKHSMRNRPRGKKKSSSSS
AT1G06160.1	ORA59	ORA59 (OCTADECANOID-RESPONSIVE ARABIDOPSIS AP2/ERF 59); DNA binding / transcription activator/ transcription factor	199	SSSSSSLSSRSRKQSVVMTQES
AT1G06190.1		ATP binding / ATPase, coupled to transmembrane movement of ions, phosphorylative mechanism	19	SDSRCFFNSAVSRRTLA
AT1G06190.1		ATP binding / ATPase, coupled to transmembrane movement of ions, phosphorylative mechanism	223	SSFTRPTSSFRRKSPVPRSQSPPAYSSE
AT1G06190.2		ATP binding / ATPase, coupled to transmembrane movement of ions, phosphorylative mechanism	19	SDSRCFFNSAVSRRTLA
AT1G06190.2		ATP binding / ATPase, coupled to transmembrane movement of ions, phosphorylative mechanism	223	SSFTRPTSSFRRKSPVPRSQSPPAYSSE
AT1G06250.1		lipase class 3 family protein	47	NWDRKSRYAGDCYYSKNRLL
AT1G06320.1		unknown protein	109	ETTPSEISKPKQKSNKRKKAT
AT1G06350.1		fatty acid desaturase family protein	0	MCDPTRDDGSSRSRVVSTMQKRAYFQR
AT1G06350.1		fatty acid desaturase family protein	70	LSITFSFHRNLSHRSFKI
AT1G06360.1		fatty acid desaturase family protein	68	SLSITFSYHRNLAHRSF
AT1G06430.1	FTSH8	FTSH8; ATP-dependent peptidase/ ATPase/ metallopeptidase/ zinc ion binding	81	SSRMSYSRFLEYLDKGRV
AT1G06490.1	ATGSL07, gsl07, atgsl7	ATGSL07 (glucan synthase-like 7); 1,3-beta-glucan synthase/ transferase, transferring glycosyl groups	1219	CQVYGNQKKSSESRDRSCYNNI
AT1G06560.1		NOL1/NOP2/sun family protein	393	TSVTSRRSEADKSCEKNDSTE
AT1G06580.1		pentatricopeptide (PPR) repeat-containing protein	31	SLRICNSRAFSGRSDYRERLRSGLHSIKF
AT1G06630.1		FUNCTIONS IN: molecular_function unknown; INVOLVED IN: biological_process unknown; LOCATED IN: cellular_component unknown; EXPRESSED IN: 24 plant structures; EXPRESSED DURING: 13 growth stages; CONTAINS InterPro DOMAIN/s: Cyclin-like F-box (InterPro:IPR001810), Leucine-rich repeat 2 (InterPro:IPR013101); BEST Arabidopsis thaliana protein match is: F-box family protein (TAIR:AT3G60040.1); Has 1188…	413	VSPHPSDSGGDGSNSKSSSD
AT1G06630.3		FUNCTIONS IN: molecular_function unknown; INVOLVED IN: biological_process unknown; LOCATED IN: cellular_component unknown; EXPRESSED IN: 24 plant structures; EXPRESSED DURING: 13 growth stages; CONTAINS InterPro DOMAIN/s: Cyclin-like F-box (InterPro:IPR001810), Leucine-rich repeat 2 (InterPro:IPR013101); BEST Arabidopsis thaliana protein match is: F-box family protein (TAIR:AT3G60040.1).	413	VSPHPSDSGGDGSNSKSSSD
AT1G06650.1		2-oxoglutarate-dependent dioxygenase, putative	125	VRKEFYSRDFSRRFLYLS
AT1G06650.2		2-oxoglutarate-dependent dioxygenase, putative	125	VRKEFYSRDFSRRFLYLS
AT1G06660.1		unknown protein	41	RSTSNLVSHSSLANSRK
AT1G06670.1	NIH	NIH (NUCLEAR DEIH-BOXHELICASE); DNA binding / DNA helicase	53	CRTMGLRSKSNGSGEERRLSLFKG
AT1G06670.1	NIH	NIH (NUCLEAR DEIH-BOXHELICASE); DNA binding / DNA helicase	93	QKEKEGDGISKSYSKHRYETRFQKAG
AT1G06690.1		aldo/keto reductase family protein	10	FNYVVSEGSHGRRSFVRKLVRAVAS
AT1G06720.1		INVOLVED IN: ribosome biogenesis; LOCATED IN: nucleus; EXPRESSED IN: 21 plant structures; EXPRESSED DURING: 13 growth stages; CONTAINS InterPro DOMAIN/s: AARP2CN (InterPro:IPR012948), Protein of unknown function DUF663 (InterPro:IPR007034); BEST Arabidopsis thaliana protein match is: unknown protein (TAIR:AT1G42440.1); Has 7944 Blast hits to 5342 proteins in 373 species: Archae - 33; Bacteria - 6…	1	AADELMPSHRSHRTPKSGPTARKKSELD
AT1G06770.1	DRIP1	DRIP1 (DREB2A-INTERACTING PROTEIN 1); protein binding / ubiquitin-protein ligase/ zinc ion binding	267	SETVTPKRMRTTQRKRSATTLGDSRN
AT1G06770.2	DRIP1	DRIP1 (DREB2A-INTERACTING PROTEIN 1); protein binding / ubiquitin-protein ligase/ zinc ion binding	153	SETVTPKRMRTTQRKRSATTLGDSRN
AT1G06800.1		lipase class 3 family protein	14	NQRTQYSLSFRPHFSRS
AT1G06800.2		lipase class 3 family protein	14	NQRTQYSLSFRPHFSRS
AT1G06810.1		unknown protein	75	YIPPRFYSNISRRRENRYNSI
AT1G06840.1		leucine-rich repeat transmembrane protein kinase, putative	567	IIMRKRMRGYSAVARRKRSSKASLK
AT1G06850.1	AtbZIP52	AtbZIP52 (Arabidopsis thaliana basic leucine zipper 52); DNA binding / transcription factor	23	PNADPIPSSSFHRRSRSDDMSMFMFMDP
AT1G06850.2	AtbZIP52	AtbZIP52 (Arabidopsis thaliana basic leucine zipper 52); DNA binding / transcription factor	23	PNADPIPSSSFHRRSRSDDMSMFMFMDP
AT1G06920.1	ATOFP4, OFP4	OFP4 (ARABIDOPSIS THALIANA OVATE FAMILY PROTEIN 4)	192	RTKKKHQKTLVSSGRRSSAKSPRIKLRARSPRIQVSPRRSKSRSQNKQILDSFAV
AT1G06920.1	ATOFP4, OFP4	OFP4 (ARABIDOPSIS THALIANA OVATE FAMILY PROTEIN 4)	52	PYSSTSYFFNRSRSRTSFESRILQISPRNSLHNIQSKRKTVY
AT1G06923.1		BEST Arabidopsis thaliana protein match is: OFP17 (ARABIDOPSIS THALIANA OVATE FAMILY PROTEIN 17) (TAIR:AT2G30395.1); Has 18 Blast hits to 18 proteins in 6 species: Archae - 0; Bacteria - 0; Metazoa - 0; Fungi - 0; Plants - 18; Viruses - 0; Other Eukaryotes - 0 (source: NCBI BLink).	0	MRLKSSLISLKSKLSKSCNR
AT1G06923.1		BEST Arabidopsis thaliana protein match is: OFP17 (ARABIDOPSIS THALIANA OVATE FAMILY PROTEIN 17) (TAIR:AT2G30395.1); Has 18 Blast hits to 18 proteins in 6 species: Archae - 0; Bacteria - 0; Metazoa - 0; Fungi - 0; Plants - 18; Viruses - 0; Other Eukaryotes - 0 (source: NCBI BLink).	62	RNSPSSLIDDSKLLHSR
AT1G06930.1		unknown protein	117	SSVPSSPLRTSDLSNRRRSMWFESGSSLDYGS
AT1G06930.1		unknown protein	34	KWESQPGTPRRLSKRSSSSGFNSDSD
AT1G06950.1	ATTIC110, TIC110	TIC110 (TRANSLOCON AT THE INNER ENVELOPE MEMBRANE OF CHLOROPLASTS 110)	26	PTLPHRFSKSECLSRRRYRVSFPRSSAASSDQ
AT1G06970.1	CHX14, ATCHX14	CHX14 (CATION/HYDROGEN EXCHANGER 14); monovalent cation:proton antiporter/ sodium:hydrogen antiporter	436	SRFLVVCLYDPSKRYRSKSKRTILDTRQRNLQ
AT1G06980.1		unknown protein	132	VSSASTGKEHRHRRRHSRSASVSTWRPLLD
AT1G07000.1	ATEXO70B2	ATEXO70B2 (exocyst subunit EXO70 family protein B2); protein binding	203	ECSRVYSSRRREFLEESLSRLHLRG
AT1G07040.1		unknown protein	17	PSSLRSTLSVSFSAGSLIR
AT1G07040.1		unknown protein	38	SVGKRNLSVVVSSGRDSSMSSNNVSRGSSSKVAAESFFRSV
AT1G07090.1	LSH6	LSH6 (LIGHT SENSITIVE HYPOCOTYLS 6)	21	VSSPPATPSRYESQKRRDW
AT1G07110.1	F2KP, ATF2KP, FKFBP	F2KP (FRUCTOSE-2,6-BISPHOSPHATASE); fructose-2,6-bisphosphate 2-phosphatase	211	PRSLSASGSFRNDSTPKAAQRNS
AT1G07110.1	F2KP, ATF2KP, FKFBP	F2KP (FRUCTOSE-2,6-BISPHOSPHATASE); fructose-2,6-bisphosphate 2-phosphatase	649	EEYESRKKDKLRYRYPRGESYL
AT1G07120.1		FUNCTIONS IN: molecular_function unknown; INVOLVED IN: biological_process unknown; LOCATED IN: chloroplast envelope; EXPRESSED IN: leaf whorl, petal, inflorescence meristem, flower; EXPRESSED DURING: 4 anthesis, petal differentiation and expansion stage; BEST Arabidopsis thaliana protein match is: proline-rich family protein (TAIR:AT4G18570.1); Has 197 Blast hits to 171 proteins in 40 species: Ar…	170	ENRSKYLSDIKSDTDRHRDH
AT1G07135.1		glycine-rich protein	113	NGSLGGGSAGSHRSSGSMNLRGTMC
AT1G07135.1		glycine-rich protein	78	RSGGRSRGGGGGSSSSRSRDWKRGGGVV
AT1G07160.1		protein phosphatase 2C, putative / PP2C, putative	245	EALTSDHRPSRDDERNRIESSGG
AT1G07200.2		ATP-dependent Clp protease ClpB protein-related	52	REVCVSRAARSVPYSSRLQFRA
AT1G07210.1		30S ribosomal protein S18 family	73	EKDKRDFNGYNRSGGSRYSGGGSMSKDE
AT1G07220.1		FUNCTIONS IN: molecular_function unknown; INVOLVED IN: biological_process unknown; LOCATED IN: mitochondrion; EXPRESSED IN: 22 plant structures; EXPRESSED DURING: 13 growth stages; CONTAINS InterPro DOMAIN/s: Lipopolysaccharide-modifying protein (InterPro:IPR006598), Protein of unknown function DUF821, CAP10-like (InterPro:IPR008539); BEST Arabidopsis thaliana protein match is: unknown protein (T…	0	MGLRLRLRLPHKSSPRSPSYLL
AT1G07270.1		cell division control protein CDC6b, putative (CDC6b)	31	YEIPRKRKMRSDSAAVSGNSVSTPKK
AT1G07280.1		binding	32	SAVSSPSRRRIIGNDGRSSLSCRSVMQSQRLN
AT1G07280.2		binding	32	SAVSSPSRRRIIGNDGRSSLSCRSVMQSQRLN
AT1G07280.3		binding	32	SAVSSPSRRRIIGNDGRSSLSCRSVMQSQRLN
AT1G07300.1		josephin protein-related	65	KGLRLVVMRKKKRSPPSKVSSFSGRSQPP
AT1G07310.1		C2 domain-containing protein	183	PSPQRDYREFSQSPSPSP
AT1G07320.1	RPL4	RPL4; poly(U) binding / structural constituent of ribosome	114	YSQKKTGHARRGSQRTPLRPG
AT1G07320.1	RPL4	RPL4; poly(U) binding / structural constituent of ribosome	31	SVSKLGSGRVSKPLSVSS
AT1G07320.2	RPL4	RPL4; poly(U) binding / structural constituent of ribosome	114	YSQKKTGHARRGSQRTPLRPG
AT1G07320.2	RPL4	RPL4; poly(U) binding / structural constituent of ribosome	31	SVSKLGSGRVSKPLSVSS
AT1G07320.3	RPL4	RPL4; poly(U) binding / structural constituent of ribosome	114	YSQKKTGHARRGSQRTPLRPG
AT1G07320.3	RPL4	RPL4; poly(U) binding / structural constituent of ribosome	31	SVSKLGSGRVSKPLSVSS
AT1G07320.4	RPL4	RPL4; poly(U) binding / structural constituent of ribosome	114	YSQKKTGHARRGSQRTPLRPG
AT1G07320.4	RPL4	RPL4; poly(U) binding / structural constituent of ribosome	31	SVSKLGSGRVSKPLSVSS
AT1G07350.1		transformer serine/arginine-rich ribonucleoprotein, putative	161	GKYLGLRTARGRHKSPSYSPRRSVSCSRSRSRSYSSDRGRSYSPSYGRRGRSSSYSPFYRRRRFYSPSRSPSPDDRYNRRRDRSYSPYYRRRDRSRSYSRNCRARDRSPYYMRRYRSRSRSYSPRYRARDRSCSPYYRGRDRSYSPHYQGRDRSYSPESRYYRRHRSVSGSVSPGGRSMSRSISPRKGRKESRSKSRRHDRQSSMCHSRSARSSTSRSVS
AT1G07350.1		transformer serine/arginine-rich ribonucleoprotein, putative	19	EYPLRLENRSPMSYSRRSRYSPSLSPYDKRRGRSVSRSLSRSPTRSVSSDAENPGNS
AT1G07350.2		transformer serine/arginine-rich ribonucleoprotein, putative	0	MSYSRRSRYSPSLSPYDKRRGRSVSRSLSRSPTRSVSSDAENPGNS
AT1G07380.1		ceramidase family protein	189	NRSPSAYLNNPSKERSKH
AT1G07380.1		ceramidase family protein	717	LCLRFKWSRHKKLSSRSQAT
AT1G07473.1		unknown protein	2	NSVNMFGKSESPRSPTRLQKQAPT
AT1G07473.1		unknown protein	58	VSPSPHSSLSKEGDDSML
AT1G07490.1	RTFL3, DVL9	RTFL3 (ROTUNDIFOLIA LIKE 3)	18	SSSTSSKSKFSRSFSTSASSSK
AT1G07490.1	RTFL3, DVL9	RTFL3 (ROTUNDIFOLIA LIKE 3)	62	SRSSSKKEKGSITQKYS
AT1G07510.1	ftsh10	ftsh10 (FtsH protease 10); ATP binding / ATPase/ metalloendopeptidase/ nucleoside-triphosphatase/ nucleotide binding / zinc ion binding	0	MIFSKLGSSLARSSRSKGFVYGGGVRSA
AT1G07540.1	TRFL2	TRFL2 (TRF-LIKE 2); DNA binding	12	GYEVPHTPRAARSPRKSAFKKKSENHQI
AT1G07540.1	TRFL2	TRFL2 (TRF-LIKE 2); DNA binding	231	ACYRTKSFRSTLRIGDRRIRKVW
AT1G07540.1	TRFL2	TRFL2 (TRF-LIKE 2); DNA binding	276	LKSDYYSKKHCLKSLRSERNYP
AT1G07550.1		leucine-rich repeat protein kinase, putative	525	FVLRRRKPSAGKVTRSSFKSENRRFTYSDVN
AT1G07560.1		leucine-rich repeat protein kinase, putative	517	FVCIKRRSSSRKGPSPSQQSIE
AT1G07570.1	APK1A, APK1	APK1A; kinase/ protein serine/threonine kinase	25	GSLGSKASSVSVRPSPRTEG
AT1G07570.2	APK1A, APK1	APK1A; kinase/ protein serine/threonine kinase	25	GSLGSKASSVSVRPSPRTEG
AT1G07615.1		GTP binding	254	RGSKFAKSTIRQTNLRS
AT1G07615.1		GTP binding	57	ARGGEGGSGCSSVRRSRADRYGKPDGGNGGR
AT1G07620.1		FUNCTIONS IN: molecular_function unknown; INVOLVED IN: biological_process unknown; LOCATED IN: cellular_component unknown; CONTAINS InterPro DOMAIN/s: GTP-binding protein Obg/CgtA (InterPro:IPR014100); BEST Arabidopsis thaliana protein match is: unknown protein (TAIR:AT5G02390.1); Has 447 Blast hits to 405 proteins in 72 species: Archae - 0; Bacteria - 6; Metazoa - 43; Fungi - 29; Plants - 122; V…	241	LLKQISRREGGDLRSKSLKLSYEEKKSDSRDNK
AT1G07630.1	PLL5	PLL5; catalytic/ protein serine/threonine phosphatase	174	LALRVGSRKRSLVRILRRAISKTMSR
AT1G07630.1	PLL5	PLL5; catalytic/ protein serine/threonine phosphatase	353	RESQDLDRRLKEQISRRSGSDRLTNHSEVLE
AT1G07690.1		unknown protein	63	RVVRSGAVVNKSSSKSSPSKNSKKKEKDKKI
AT1G07710.1		ankyrin repeat family protein	505	NLRNIRRSSINSISGSW
AT1G07725.1	ATEXO70H6	ATEXO70H6 (exocyst subunit EXO70 family protein H6); protein binding	113	FYRVLKSNRRFLSPESVSGWSS
AT1G07725.1	ATEXO70H6	ATEXO70H6 (exocyst subunit EXO70 family protein H6); protein binding	592	GRSVPVSKTKKYMVSPSH
AT1G07780.1	PAI1, TRP6	PAI1 (PHOSPHORIBOSYLANTHRANILATE ISOMERASE 1); phosphoribosylanthranilate isomerase	18	SKTYKSGLSNRTVSFSR
AT1G07780.2	PAI1, TRP6	PAI1 (PHOSPHORIBOSYLANTHRANILATE ISOMERASE 1); phosphoribosylanthranilate isomerase	18	SKTYKSGLSNRTVSFSR
AT1G07780.3	PAI1, TRP6	PAI1 (PHOSPHORIBOSYLANTHRANILATE ISOMERASE 1); phosphoribosylanthranilate isomerase	18	SKTYKSGLSNRTVSFSR
AT1G07780.4	PAI1, TRP6	PAI1 (PHOSPHORIBOSYLANTHRANILATE ISOMERASE 1); phosphoribosylanthranilate isomerase	18	SKTYKSGLSNRTVSFSR
AT1G07850.1		transferase, transferring glycosyl groups	178	SQDTSRFRYTHPVGDRSAVRI
AT1G07850.1		transferase, transferring glycosyl groups	30	NHSNSARTSHLSFLRSPLP
AT1G07870.1		protein kinase family protein	8	KSSKRSETNKDTVINRK
AT1G07970.1		unknown protein	12	TQGSSPSPKPSKFSVYRNP
AT1G07980.1	NF-YC10	NF-YC10 (NUCLEAR FACTOR Y, SUBUNIT C10); transcription factor	9	KKARSDVVVNKASGRSKRSSGSRTKKTSNKVNI
AT1G07985.1		Expressed protein	18	VRKLEEMKGSSPRSSSPS
AT1G07990.1		SIT4 phosphatase-associated family protein	266	DPRRSAVSSSMFNSYRGQH
AT1G08000.1		zinc finger (GATA type) family protein	145	FPVKGMRSKRRRPTTVRLSYLFP
AT1G08000.2		zinc finger (GATA type) family protein	145	FPVKGMRSKRRRPTTVRLSYLFP
AT1G08010.1		zinc finger (GATA type) family protein	144	FPVKGMRSKRKRPTTLRLSYLFP
AT1G08010.2		zinc finger (GATA type) family protein	144	FPVKGMRSKRKRPTTLRLSYLFP
AT1G08030.1		unknown protein	40	SSSSREEHVNKDKRSLKD
AT1G08040.1		unknown protein	62	KLFSGGRSPEDIGSRKSPKIYVP
AT1G08040.2		unknown protein	62	KLFSGGRSPEDIGSRKSPKIYVP
AT1G08050.1		zinc finger (C3HC4-type RING finger) family protein	22	PKTLDPSSPSPSDASRSSVDPNRP
AT1G08060.1	MOM	MOM (MORPHEUS MOLECULE)	51	ATRKSERLAPSPASVSKKSG
AT1G08060.1	MOM	MOM (MORPHEUS MOLECULE)	73	VKNSTPSSLRRSNRGKTEVSLQSSKGSDNSIRKGDTSPDI
AT1G08060.2	MOM	MOM (MORPHEUS MOLECULE)	51	ATRKSERLAPSPASVSKKSG
AT1G08060.2	MOM	MOM (MORPHEUS MOLECULE)	73	VKNSTPSSLRRSNRGKTEVSLQSSKGSDNSIRKGDTSPDI
AT1G08130.1	ATLIG1	ATLIG1 (ARABIDOPSIS THALIANA DNA LIGASE 1); ATP binding / DNA binding / DNA ligase (ATP)	67	KKKTPQTTNLSRSPNKRKI
AT1G08135.1	ATCHX6B, CHX6B	CHX6B (CATION/H+ EXCHANGER 6B); monovalent cation:proton antiporter	561	SHQLQKPKPGSRSYSEN
AT1G08140.1	ATCHX6A, CHX6A	ATCHX6A (CATION/H+ EXCHANGER 6A); monovalent cation:proton antiporter/ sodium:hydrogen antiporter	169	GSLTFRYRERRGDSSILR
AT1G08160.1		harpin-induced protein-related / HIN1-related / harpin-responsive protein-related	174	ITARVSYKTWIFRSRRRTLK
AT1G08165.1		unknown protein	29	LRSKGSPTPTIGYNKKS
AT1G08260.1	EMB2284, POL2A, TIL1, EMB529, ABO4	TIL1 (TILTED 1); DNA binding / DNA-directed DNA polymerase/ nucleic acid binding / nucleotide binding / zinc ion binding	2223	CSGSFRCKESGSEFSKRM
AT1G08260.1	EMB2284, POL2A, TIL1, EMB529, ABO4	TIL1 (TILTED 1); DNA binding / DNA-directed DNA polymerase/ nucleic acid binding / nucleotide binding / zinc ion binding	725	YVDTVRSFRDRRYEYKTLNKVW
AT1G08260.2	EMB529	TIL1 (TILTED 1); DNA binding / DNA-directed DNA polymerase/ nucleic acid binding / nucleotide binding / zinc ion binding	2099	CSGSFRCKESGSEFSKRM
AT1G08260.2	EMB529	TIL1 (TILTED 1); DNA binding / DNA-directed DNA polymerase/ nucleic acid binding / nucleotide binding / zinc ion binding	708	YVDTVRSFRDRRYEYKTLNKVW
AT1G08280.1		glycosyl transferase family 29 protein / sialyltransferase family protein	72	EVDLISDYDHTRRSHRRHFSSMSIRPSEQQRRVSRD
AT1G08290.1		zinc finger (C2H2 type) protein (WIP3)	27	SSKSVLYRGKTRDAISRSN
AT1G08290.1		zinc finger (C2H2 type) protein (WIP3)	294	CGSDFKHKRSLKDHIRSFGSGHSPHPSL
AT1G08300.1		FUNCTIONS IN: molecular_function unknown; INVOLVED IN: biological_process unknown; LOCATED IN: endomembrane system; BEST Arabidopsis thaliana protein match is: ATP binding (TAIR:AT4G13750.1); Has 55 Blast hits to 51 proteins in 25 species: Archae - 0; Bacteria - 0; Metazoa - 16; Fungi - 0; Plants - 21; Viruses - 0; Other Eukaryotes - 18 (source: NCBI BLink).	386	GSSSKKRKAESRNHEKSDSPKLLRRGPSKLRRGHV
AT1G08310.1		esterase/lipase/thioesterase family protein	67	RSGYGASDSNTKRSLES
AT1G08310.2		esterase/lipase/thioesterase family protein	70	RSGYGASDSNTKRSLES
AT1G08320.1		bZIP family transcription factor	150	STSRTLAPPKPSEDKRK
AT1G08320.2		bZIP family transcription factor	26	STSRTLAPPKPSEDKRK
AT1G08320.3		bZIP family transcription factor	150	STSRTLAPPKPSEDKRK
AT1G08350.1		endomembrane protein 70 family protein	122	SERSETRMNKYSRASFH
AT1G08350.2		endomembrane protein 70 family protein	203	SERSETRMNKYSRASFH
AT1G08400.1		chromosome structural maintenance protein-related	184	TRHHSRWRRLVDSVDSRVDKSL
AT1G08430.1	ALMT1, ATALMT1	ALMT1 (ALUMINUM-ACTIVATED MALATE TRANSPORTER 1); malate transmembrane transporter	442	DRSNNVDDSRGGSSQDS
AT1G08490.1	ATSUFS, SUFS, ATCPNIFS, ATNFS2, CPNIFS	CPNIFS (CHLOROPLASTIC NIFS-LIKE CYSTEINE DESULFURASE); cysteine desulfurase/ selenocysteine lyase/ transaminase	15	SIGHRSFSRVRCSSSLSVCSA
AT1G08540.1	SIGB, SIG1, SIG2, SIGA, ATSIG1, ABC1, ATSIG2	SIG2 (RNA POLYMERASE SIGMA SUBUNIT 2); DNA binding / DNA-directed RNA polymerase/ sigma factor/ transcription factor	206	SVSLAVRSTRQTERKARRAK
AT1G08550.1	NPQ1, AVDE1	NPQ1 (NON-PHOTOCHEMICAL QUENCHING 1); violaxanthin de-epoxidase	51	LRTTGGRSSRPLSAFRSGFSKG
AT1G08550.2	NPQ1, AVDE1	NPQ1 (NON-PHOTOCHEMICAL QUENCHING 1); violaxanthin de-epoxidase	51	LRTTGGRSSRPLSAFRSGFSKG
AT1G08560.1	SYP111, KN, ATSYP111	SYP111 (SYNTAXIN OF PLANTS 111); SNAP receptor	115	ANKEIKRLSGTPVYRSRTA
AT1G08580.1		unknown protein	77	ASEDSKKSPRKFSVKKSLKLNKL
AT1G08660.1		glycosyl transferase family 29 protein / sialyltransferase family protein	346	HSPMRSERKEDWSSVPSR
AT1G08660.1		glycosyl transferase family 29 protein / sialyltransferase family protein	406	KGPVSGSPDMSETRKKS
AT1G08680.1	ZIGA4, AGD14	ZIGA4 (ARF GAP-like zinc finger-containing protein ZiGA4); ARF GTPase activator/ DNA binding / zinc ion binding	215	PRASDYSVSSAGDPFRSD
AT1G08680.1	ZIGA4, AGD14	ZIGA4 (ARF GAP-like zinc finger-containing protein ZiGA4); ARF GTPase activator/ DNA binding / zinc ion binding	262	PGRQHQRTTSSGSVRSVDSNFMSIKS
AT1G08680.2	ZIGA4	ZIGA4 (ARF GAP-like zinc finger-containing protein ZiGA4); ARF GTPase activator/ DNA binding / zinc ion binding	215	PRASDYSVSSAGDPFRSD
AT1G08680.2	ZIGA4	ZIGA4 (ARF GAP-like zinc finger-containing protein ZiGA4); ARF GTPase activator/ DNA binding / zinc ion binding	262	PGRQHQRTTSSGSVRSVDSNFMSIKS
AT1G08680.3	ZIGA4	ZIGA4 (ARF GAP-like zinc finger-containing protein ZiGA4); ARF GTPase activator/ DNA binding / zinc ion binding	220	PGRQHQRTTSSGSVRSVDSNFMSIKS
AT1G08700.1		presenilin family protein	221	ARPTVSSGNQRRNRGSSLRALVG
AT1G08700.1		presenilin family protein	293	NGSRGGLERSPLVGSPSAS
AT1G08720.1	EDR1, ATEDR1	EDR1 (ENHANCED DISEASE RESISTANCE 1); MAP kinase kinase kinase/ kinase/ protein serine/threonine/tyrosine kinase	107	TLLSLGSHQRMDSRRDSSEV
AT1G08730.1	XIC, ATXIC	XIC; motor/ protein binding	1063	APNKFLSGRSRSILQRGSESGHLAV
AT1G08730.1	XIC, ATXIC	XIC; motor/ protein binding	795	VKIQKNGRRHYSRKSYKKLHVASL
AT1G08760.1		unknown protein	167	RLSVSISRDDSSDGKKPVS
AT1G08760.1		unknown protein	294	ALRKSWEGNLDIRGSDRTKSSLPRRDLTPDSRSLAAPRRSTSSEKLPS
AT1G08760.1		unknown protein	374	KDKTSRPKSTSVEKKSV
AT1G08760.1		unknown protein	544	SVYSSKQAKLAASRSKP
AT1G08790.1		unknown protein	133	SSSRPTSLGDRSSSFGSPISDSDSLKV
AT1G08800.1		unknown protein	118	VGKLGEDSHFGSKSDRSKYPNCSKLTD
AT1G08800.2		unknown protein	118	VGKLGEDSHFGSKSDRSKYPNCSKLTD
AT1G08810.1	MYB60, AtMYB60	MYB60 (myb domain protein 60); DNA binding / transcription factor	109	THLKKKLNKSDSDERSRSENIALQTS
AT1G08810.2	MYB60	MYB60 (myb domain protein 60); DNA binding / transcription factor	26	THLKKKLNKSDSDERSRSENIALQTS
AT1G08840.1	emb2411	emb2411 (embryo defective 2411); ATP binding / ATP-dependent DNA helicase/ DNA binding	1222	LVSFVRSREKPRSSASSLLGDW
AT1G08840.1	emb2411	emb2411 (embryo defective 2411); ATP binding / ATP-dependent DNA helicase/ DNA binding	1	PPRKKPKSSALKSNKQSSA
AT1G08840.1	emb2411	emb2411 (embryo defective 2411); ATP binding / ATP-dependent DNA helicase/ DNA binding	734	YRFVRQKSSESRERVTSE
AT1G08840.1	emb2411	emb2411 (embryo defective 2411); ATP binding / ATP-dependent DNA helicase/ DNA binding	791	ADISRTHISVSLSKRLR
AT1G08880.1	HTA5, H2AXA, G-H2AX, GAMMA-H2AX	H2AXA; DNA binding	8	TTKGGRGKPKATKSVSRSSKAGLQ
AT1G08990.1	PGSIP5	PGSIP5 (PLANT GLYCOGENIN-LIKE STARCH INITIATION PROTEIN 5); transferase, transferring glycosyl groups	339	RSPFSKKRSYNEWNYSK
AT1G09000.1	ANP1, MAPKKK1	ANP1 (ARABIDOPSIS NPK1-RELATED PROTEIN KINASE 1); MAP kinase kinase kinase/ kinase	528	KREDTARGFLKLPPKSRSPSRGPLGGSPSRATD
AT1G09000.1	ANP1, MAPKKK1	ANP1 (ARABIDOPSIS NPK1-RELATED PROTEIN KINASE 1); MAP kinase kinase kinase/ kinase	637	MRQAGLGSSPRDRGMSRQREKSRFASPG
AT1G09040.1		unknown protein	188	YNSAKYHSWSESRKKRNRKCVFGRTLYSG
AT1G09040.1		unknown protein	418	LSSDKSDEESVPSDSLRHRYLRSPCSNRGTLGMK
AT1G09040.1		unknown protein	596	PYLKRRRLSACISRESPVSKHI
AT1G09040.1		unknown protein	98	DMNQSLKSLRAKKSRCSAKIRGKSDKNSE
AT1G09050.1		unknown protein	189	NSAKYHTWSESRKKRNRKCVYGRKLYSG
AT1G09050.1		unknown protein	420	SDQSDEESSPSDSLRHRYLRSPCSNRGTLGMK
AT1G09050.1		unknown protein	596	PYLKRRRLSACISRESPVSKHL
AT1G09050.1		unknown protein	844	DLEHRGEDRSSFTKKSPTSKPLDQ
AT1G09060.1		transcription factor jumonji (jmjC) domain-containing protein	108	ASASKSNGRLEKRHNKSLMRYSPETPMMRSFSPRVA
AT1G09060.2		transcription factor jumonji (jmjC) domain-containing protein	108	ASASKSNGRLEKRHNKSLMRYSPETPMMRSFSPRVA
AT1G09060.3		transcription factor jumonji (jmjC) domain-containing protein	122	ASASKSNGRLEKRHNKSLMRYSPETPMMRSFSPRVA
AT1G09090.1	ATRBOHB	ATRBOHB (respiratory burst oxidase homolog B); FAD binding / calcium ion binding / electron carrier/ iron ion binding / oxidoreductase/ oxidoreductase, acting on NADH or NADPH, with oxygen as acceptor / peroxidase	57	SGRLKTMVKSLSFASRRLDRSKSFGAMF
AT1G09090.2	ATRBOHB	ATRBOHB (respiratory burst oxidase homolog B); FAD binding / calcium ion binding / electron carrier/ iron ion binding / oxidoreductase/ oxidoreductase, acting on NADH or NADPH, with oxygen as acceptor / peroxidase	57	SGRLKTMVKSLSFASRRLDRSKSFGAMF
AT1G09130.1		ATP-dependent Clp protease proteolytic subunit, putative	17	SFSPHPPLSSNSSGRRNLK
AT1G09130.2		ATP-dependent Clp protease proteolytic subunit, putative	17	SFSPHPPLSSNSSGRRNLK
AT1G09140.1		SF2/ASF-like splicing modulator (SRP30)	175	SSAYIRVREYESRSVSRSPDDSKSYRSRSRSRGPSCSYSSKSRSVSPARSISPRSRPLSRSRSLYSSVSRSQSRSKSRSRSRSNSPVSPVIS
AT1G09140.1		SF2/ASF-like splicing modulator (SRP30)	77	EIAHGGRRFSPSVDRYSSSYSASRAPSRRSDYRVLVT
AT1G09140.2		SF2/ASF-like splicing modulator (SRP30)	175	SSAYIRVREYESRSVSRSPDDSKSYRSRSRSRGPSCSYSSKSRSVSPARSISPRSRPLSRSRSLYSSVSRSGSLLRAGDW
AT1G09140.2		SF2/ASF-like splicing modulator (SRP30)	77	EIAHGGRRFSPSVDRYSSSYSASRAPSRRSDYRVLVT
AT1G09155.1	AtPP2-B15	AtPP2-B15 (Phloem protein 2-B15); carbohydrate binding	105	TWSDQRHYWSWSPRSDSRFSEGVQLI
AT1G09170.1		kinesin motor protein-related	586	KNRAVSATAMNDRSSRSHS
AT1G09170.1		kinesin motor protein-related	771	KLLRKKSLGVSSSFSKSANS
AT1G09176.1		unknown protein	79	GSSGRGGNSGKGGSRGSSNSGGRGSSGNG
AT1G09420.1	G6PD4	G6PD4 (GLUCOSE-6-PHOSPHATE DEHYDROGENASE 4); glucose-6-phosphate dehydrogenase	28	SFSNFPVSSRDYSFSRSGSLVLNGG
AT1G09440.1		protein kinase family protein	25	SFCLIWKKKSRRSKTLS
AT1G09440.1		protein kinase family protein	442	RRTQEENSDTDRSRPVSRSQSKR
AT1G09450.1		haspin-related	49	ARTSSVNGPKRDSWARSLSTRGRESIA
AT1G09450.1		haspin-related	553	TKKSFERSSKHERELRSLKKRMEK
AT1G09520.1		protein binding / zinc ion binding	72	SPPSFRRVSCSIKGCHS
AT1G09530.1	PIF3, POC1, PAP3	PIF3 (PHYTOCHROME INTERACTING FACTOR 3); DNA binding / protein binding / transcription factor/ transcription regulator	324	DGRKEAGPSRTGLGSKRSRSAEVHNLSERRRRDRIN
AT1G09530.2	PIF3, POC1, PAP3	PIF3 (PHYTOCHROME INTERACTING FACTOR 3); DNA binding / protein binding / transcription factor/ transcription regulator	324	DGRKEAGPSRTGLGSKRSRSAEVHNLSERRRRDRIN
AT1G09540.1	MYB61, ATMYB61	MYB61 (MYB DOMAIN PROTEIN 61); DNA binding / transcription factor	132	ESFSDKDKPTTSNNKRSGNDHKSPSSSSA
AT1G09550.1		pectinacetylesterase, putative	293	PSADKSGSWHNCSFSFR
AT1G09570.1	PHYA, FHY2, FRE1, HY8	PHYA (PHYTOCHROME A); G-protein coupled photoreceptor/ protein histidine kinase/ red or far-red light photoreceptor/ signal transducer	0	MSGSRPTQSSEGSRRSRHSARIIAQTT
AT1G09600.1		protein kinase family protein	23	SNVNVKERRSKPKKTPKKKKKSKSASSSKD
AT1G09600.1		protein kinase family protein	566	VMMGSSRSPRKELRTQRSFVQRGTAQLSRFSNS
AT1G09660.1		KH domain-containing quaking protein, putative	276	SLSPCLSPSMSPFNSKRAK
AT1G09660.1		KH domain-containing quaking protein, putative	27	FRASPNRSPCPPSDRERYLT
AT1G09660.1		KH domain-containing quaking protein, putative	77	SSFPDLDRYEHGSPFRSL
AT1G09660.2		KH domain-containing quaking protein, putative	27	FRASPNRSPCPPSDRERYLT
AT1G09660.2		KH domain-containing quaking protein, putative	77	SSFPDLDRYEHGSPFRSL
AT1G09720.1		kinase interacting family protein	856	ATRSLSKRMPSSAGKPR
AT1G09770.1	ATCDC5, CDC5, ATMYBCDC5	ATCDC5 (ARABIDOPSIS THALIANA CELL DIVISION CYCLE 5); DNA binding / transcription factor	431	SRDGSSFSMTPKGTPFR
AT1G09800.1		tRNA pseudouridine synthase family protein	286	GEVEGSTEGDSFGRRRRHRCYVVTARSRGFLY
AT1G09810.1	ECT11	ECT11 (evolutionarily conserved C-terminal region 11)	76	SDVYADSTLRGDRPKGSNCLSQTSFS
AT1G09812.1		unknown protein	7	SIYSPREGDSEGPWRSS
AT1G09820.1		pentatricopeptide (PPR) repeat-containing protein	2	PKSLAVSRKNSNLTKGVS
AT1G09840.1	ATSK41	ATSK41 (SHAGGY-LIKE PROTEIN KINASE 41); ATP binding / protein kinase/ protein serine/threonine kinase	66	RTTLRGRNGQSRQTVSY
AT1G09840.2	ATSK41	ATSK41 (SHAGGY-LIKE PROTEIN KINASE 41); ATP binding / protein kinase/ protein serine/threonine kinase	66	RTTLRGRNGQSRQTVSY
AT1G09840.3	ATSK41	ATSK41 (SHAGGY-LIKE PROTEIN KINASE 41); ATP binding / protein kinase/ protein serine/threonine kinase	66	RTTLRGRNGQSRQTVSY
AT1G09840.4	ATSK41	ATSK41 (SHAGGY-LIKE PROTEIN KINASE 41); ATP binding / protein kinase/ protein serine/threonine kinase	66	RTTLRGRNGQSRQTVSY
AT1G09840.5	ATSK41	ATSK41 (SHAGGY-LIKE PROTEIN KINASE 41); ATP binding / protein kinase/ protein serine/threonine kinase	66	RTTLRGRNGQSRQTVSY
AT1G09840.6	ATSK41	ATSK41 (SHAGGY-LIKE PROTEIN KINASE 41); ATP binding / protein kinase/ protein serine/threonine kinase	66	RTTLRGRNGQSRQTVSY
AT1G09880.1		lyase	316	ASDQRGSVSGRLLVRDRFISS
AT1G09900.1		pentatricopeptide (PPR) repeat-containing protein	24	KRGNKLDVSCRTSGSISSKIPLGSRKRNRL
AT1G09950.1		transcription factor-related	112	TRHQKDRISSLKSETRRKEREV
AT1G09960.1	SUT4, ATSUT4, suc4	SUT4 (SUCROSE TRANSPORTER 4); carbohydrate transmembrane transporter/ sucrose transmembrane transporter/ sucrose:hydrogen symporter/ sugar:hydrogen symporter	20	RPSTSSSRPVVSPPRSKVSKRVLLRVAS
AT1G09960.1	SUT4, ATSUT4, suc4	SUT4 (SUCROSE TRANSPORTER 4); carbohydrate transmembrane transporter/ sucrose transmembrane transporter/ sucrose:hydrogen symporter/ sugar:hydrogen symporter	94	LVGHSSDRCTSKYGRRRP
AT1G09970.1	LRR XI-23	LRR XI-23; ATP binding / kinase/ protein kinase/ protein serine/threonine kinase	634	EKKEGRSLKHESWSIKSFRKMSF
AT1G09970.2	LRR XI-23	LRR XI-23; ATP binding / kinase/ protein kinase/ protein serine/threonine kinase	634	EKKEGRSLKHESWSIKSFRKMSF
AT1G10020.1		unknown protein	192	TCKFSCRHTGDRTQRSRSLPTETSVSRSWLNSFGSERERPGKE
AT1G10020.1		unknown protein	341	GSSPSSSSPTSVVNRSRSRRGGSSGSGGGASPA
AT1G10050.1		glycosyl hydrolase family 10 protein / carbohydrate-binding domain-containing protein	717	RQTRNSFPLGSCISRSN
AT1G10070.1	ATBCAT-2	ATBCAT-2 (ARABIDOPSIS THALIANA BRANCHED-CHAIN AMINO ACID TRANSAMINASE 2); branched-chain-amino-acid transaminase/ catalytic	247	SRAKSRGFSDVLYLDSV
AT1G10070.2	ATBCAT-2	ATBCAT-2 (ARABIDOPSIS THALIANA BRANCHED-CHAIN AMINO ACID TRANSAMINASE 2); branched-chain-amino-acid transaminase/ catalytic	247	SRAKSRGFSDVLYLDSV
AT1G10070.3	ATBCAT-2	ATBCAT-2 (ARABIDOPSIS THALIANA BRANCHED-CHAIN AMINO ACID TRANSAMINASE 2); branched-chain-amino-acid transaminase/ catalytic	177	SRAKSRGFSDVLYLDSV
AT1G10095.1		protein prenyltransferase	162	LILSNSPKSESTWSHRRWIIKM
AT1G10150.1		carbohydrate binding	288	DDFKSNGSARSKMVSESGDGVKS
AT1G10180.1		unknown protein	156	RSSPDLKGSVEMSSYKS
AT1G10210.1	ATMPK1, MPK1	ATMPK1 (MITOGEN-ACTIVATED PROTEIN KINASE 1); MAP kinase/ kinase	266	KRYIRSLPYSPGMSLSRL
AT1G10210.2	ATMPK1, MPK1	ATMPK1 (MITOGEN-ACTIVATED PROTEIN KINASE 1); MAP kinase/ kinase	266	KRYIRSLPYSPGMSLSRL
AT1G10220.1		FUNCTIONS IN: molecular_function unknown; INVOLVED IN: biological_process unknown; BEST Arabidopsis thaliana protein match is: ZCF37 (TAIR:AT1G59590.1); Has 30 Blast hits to 30 proteins in 10 species: Archae - 0; Bacteria - 2; Metazoa - 6; Fungi - 0; Plants - 15; Viruses - 0; Other Eukaryotes - 7 (source: NCBI BLink).	0	MLSPFSSPRRSRRGNKESKNPYSNQG
AT1G10240.1	FRS11	FRS11 (FAR1-related sequence 11); zinc ion binding	102	TPIKTLSEGKPQRNRRSSRCGCQ
AT1G10240.1	FRS11	FRS11 (FAR1-related sequence 11); zinc ion binding	166	RSISDADKSRILMFSKT
AT1G10240.1	FRS11	FRS11 (FAR1-related sequence 11); zinc ion binding	427	SRSLWSLPYLRSHFLAG
AT1G10240.1	FRS11	FRS11 (FAR1-related sequence 11); zinc ion binding	598	PLRWRRISTSFSKTFRSNA
AT1G10280.1		unknown protein	256	DSYDEPTRYGRGRYSRKMLP
AT1G10290.1	ADL6, DRP2A	ADL6 (DYNAMIN-LIKE PROTEIN 6); GTPase	701	VGSVSMRQSLSEGSLDKM
AT1G10290.1	ADL6, DRP2A	ADL6 (DYNAMIN-LIKE PROTEIN 6); GTPase	792	NVKRRRERYQKQSSLLSKLTR
AT1G10290.1	ADL6, DRP2A	ADL6 (DYNAMIN-LIKE PROTEIN 6); GTPase	858	GPSDSLSKYGSGGHSRRYSDP
AT1G10290.1	ADL6, DRP2A	ADL6 (DYNAMIN-LIKE PROTEIN 6); GTPase	883	DAASPGSGSNRRTTPNRLPP
AT1G10300.1		GTP-binding protein-related	558	LGLDPSSALNRARSKSRGRKRERYDDLSNDAM
AT1G10300.1		GTP-binding protein-related	596	DEQHKKKKMCLRSKSRSLSRSRSVSRPPHEVVPGEG
AT1G10320.1		U2 snRNP auxiliary factor-related	449	SISDLSTDSHRQPSRRSRSRDHDHANVGSTPSYRSRKYHGDTQDSTREDK
AT1G10320.1		U2 snRNP auxiliary factor-related	511	DSPSRDGSLEREMYKERRYAKDTLHRDSRWSEHS
AT1G10320.1		U2 snRNP auxiliary factor-related	590	EQMDNEKDRKTHRSSRKHSREGSSADKEEGHEHDRVHTVSDKSHRERSKHRHERSSSRYSHEEDSTESRHHQHKESDKKRSVETSPVGYQSDKDRDRSKQRQRYKSDDPESDQSRKGKRQSEENSDRETHK
AT1G10385.1		FUNCTIONS IN: molecular_function unknown; LOCATED IN: cellular_component unknown; CONTAINS InterPro DOMAIN/s: Vps51/Vps67 (InterPro:IPR014812); BEST Arabidopsis thaliana protein match is: unknown protein (TAIR:AT5G49830.1); Has 304 Blast hits to 243 proteins in 98 species: Archae - 0; Bacteria - 22; Metazoa - 141; Fungi - 74; Plants - 62; Viruses - 0; Other Eukaryotes - 5 (source: NCBI BLink).	518	GTSQSTPRRGSSDRQNRPE
AT1G10410.1		INVOLVED IN: N-terminal protein myristoylation; LOCATED IN: chloroplast; EXPRESSED IN: 24 plant structures; EXPRESSED DURING: 15 growth stages; CONTAINS InterPro DOMAIN/s: Protein of unknown function DUF1336 (InterPro:IPR009769); BEST Arabidopsis thaliana protein match is: CW14 (TAIR:AT1G59650.1); Has 144 Blast hits to 144 proteins in 21 species: Archae - 0; Bacteria - 0; Metazoa - 9; Fungi - 2; …	166	PSIDKRRSLSSSPPSSRKKSSLRLSYKWREGH
AT1G10410.1		INVOLVED IN: N-terminal protein myristoylation; LOCATED IN: chloroplast; EXPRESSED IN: 24 plant structures; EXPRESSED DURING: 15 growth stages; CONTAINS InterPro DOMAIN/s: Protein of unknown function DUF1336 (InterPro:IPR009769); BEST Arabidopsis thaliana protein match is: CW14 (TAIR:AT1G59650.1); Has 144 Blast hits to 144 proteins in 21 species: Archae - 0; Bacteria - 0; Metazoa - 9; Fungi - 2; …	4	VSTPKSCVGAKLRSSKRRKSRRRRKIQRKRA
AT1G10450.1	SNL6	SNL6 (SIN3-LIKE 6)	1132	SDLLYRSKQGKPNSRVS
AT1G10450.1	SNL6	SNL6 (SIN3-LIKE 6)	32	SFFCSSRNQSAGESGRR
AT1G10450.1	SNL6	SNL6 (SIN3-LIKE 6)	655	ASGSNRKHPISPKRLSKDNTK
AT1G10470.1	ARR4, MEE7, ATRR1, IBC7	ARR4 (RESPONSE REGULATOR 4); protein binding / transcription regulator/ two-component response regulator	239	TSSSEESPIRRQKMRSPGL
AT1G10480.1	ZFP5	ZFP5 (ZINC FINGER PROTEIN 5); nucleic acid binding / transcription factor/ zinc ion binding	182	FQRDLSSRSDQMRSINSLDLHLG
AT1G10510.1	emb2004	emb2004 (embryo defective 2004)	114	KFMSPKSPKTSAGENNSS
AT1G10510.1	emb2004	emb2004 (embryo defective 2004)	24	KSGFRYELLGSSVSRNR
AT1G10510.1	emb2004	emb2004 (embryo defective 2004)	58	IKAAYNSDGGSKRSRVYKESQAAS
AT1G10520.1		DNA polymerase lambda (POLL)	126	SGSEDQSSPQKRTRYSPDAGDFKG
AT1G10522.1		unknown protein	47	RCRTKVRDFSLSSLSRRGF
AT1G10522.2		unknown protein	47	RCRTKVRDFSLSSLSRRGF
AT1G10540.1	ATNAT8, NAT8	xanthine/uracil permease family protein	510	KRFKSFQSDNRSEEFYSL
AT1G10560.1	PUB18, ATPUB18	PUB18 (PLANT U-BOX 18); ubiquitin-protein ligase	74	RIRNSRRYFHDSAAASSLK
AT1G10585.1		transcription factor	85	YEGSFLLPKLSIRSRDS
AT1G10586.1		transcription regulator	82	KNRSEGSSLLPKLSIRSLD
AT1G10586.2		BEST Arabidopsis thaliana protein match is: transcription factor (TAIR:AT1G10585.1); Has 32 Blast hits to 32 proteins in 6 species: Archae - 0; Bacteria - 0; Metazoa - 0; Fungi - 0; Plants - 32; Viruses - 0; Other Eukaryotes - 0 (source: NCBI BLink).	41	KNRSEGSSLLPKLSIRSLD
AT1G10600.2		FUNCTIONS IN: molecular_function unknown; INVOLVED IN: ubiquitin-dependent protein catabolic process; LOCATED IN: mitochondrion; EXPRESSED IN: cultured cell; CONTAINS InterPro DOMAIN/s: Mov34/MPN/PAD-1 (InterPro:IPR000555); BEST Arabidopsis thaliana protein match is: unknown protein (TAIR:AT4G16144.1); Has 601 Blast hits to 601 proteins in 160 species: Archae - 0; Bacteria - 0; Metazoa - 286; Fun…	8	WRISLSLQERTLRRTSRL
AT1G10620.1		protein kinase family protein	279	VFFVRRKQKKGSSSPRSNQYLP
AT1G10640.1		polygalacturonase	27	ETCIARRGRHWRHSHRSSSDLSDSLSNKKPKSHGNSHHHSSHN
AT1G10700.1		ribose-phosphate pyrophosphokinase 3 / phosphoribosyl diphosphate synthetase 3 (PRS3)	90	SESGSKSSKRVCLFHSD
AT1G10720.1		BSD domain-containing protein	92	SDLSNHPRFNQSRSSDPGLNQSRSSDRDESCVGSDTPE
AT1G10750.1		unknown protein	195	RANSVSSFGKKLRHYRRDTS
AT1G10750.1		unknown protein	31	LFSEETRMRTRETRRRRRSFFLDMILL
AT1G10760.1	SEX1, SOP1, SOP, GWD1, GWD	SEX1 (STARCH EXCESS 1); alpha-glucan, water dikinase	134	PSRSPDRTQNFKNSALRTP
AT1G10790.1		FUNCTIONS IN: molecular_function unknown; INVOLVED IN: biological_process unknown; LOCATED IN: cellular_component unknown; BEST Arabidopsis thaliana protein match is: hydroxyproline-rich glycoprotein family protein (TAIR:AT3G56590.2); Has 40 Blast hits to 40 proteins in 7 species: Archae - 0; Bacteria - 0; Metazoa - 0; Fungi - 0; Plants - 40; Viruses - 0; Other Eukaryotes - 0 (source: NCBI BLink).	22	ESSPRSSGRSCSSAFSRLV
AT1G10870.1	AGD4	AGD4 (ARF-GAP domain 4); ARF GTPase activator/ protein binding / zinc ion binding	322	RTNGNKSMGSHHHYSGSSDHNTGVFGRFRARHNRSGSLTEGSLGY
AT1G10880.1		unknown protein	72	PLTSPSLSPPPSPSPRSSGSNIAD
AT1G10890.1		unknown protein	0	MPRDLSRSRSPSPSPSRRRKHSRSPVRQRHSRRSRRDRSPSPYSSHSYSRRKSRSISPRRHRSRSVTPKRRSPTPKRYKRQKSRSSTPSPAKRSPAATL
AT1G10900.1		phosphatidylinositol-4-phosphate 5-kinase family protein	263	SKSARFSGSGQSEGQDK
AT1G10910.1		INVOLVED IN: biological_process unknown; EXPRESSED IN: 22 plant structures; EXPRESSED DURING: 13 growth stages; CONTAINS InterPro DOMAIN/s: Pentatricopeptide repeat (InterPro:IPR002885); BEST Arabidopsis thaliana protein match is: PTAC2 (PLASTID TRANSCRIPTIONALLY ACTIVE2) (TAIR:AT1G74850.1); Has 17570 Blast hits to 5782 proteins in 175 species: Archae - 1; Bacteria - 18; Metazoa - 305; Fungi - 26…	56	AEAPRSKRHSNSYLARKSAISE
AT1G10920.1	LOV1	LOV1; ATP binding	399	ATSAINARSLSKSRRLSVHGGNAL
AT1G10920.2	LOV1	LOV1; ATP binding	399	ATSAINARSLSKSRRLSVHGGNAL
AT1G10930.1	ATSGS1, RECQ4A, ATRECQ4A	RECQ4A; ATP binding / ATP-dependent helicase/ helicase/ nucleic acid binding	1101	KKDSIISNDSPDSGKRRRDENISPNV
AT1G10930.1	ATSGS1, RECQ4A, ATRECQ4A	RECQ4A; ATP binding / ATP-dependent helicase/ helicase/ nucleic acid binding	238	SVSNFSLRTPPVDRSASRL
AT1G10990.1		unknown protein	34	IIRRYRKGSTKTNSPPPSAL
AT1G11000.1	MLO4, ATMLO4	MLO4 (MILDEW RESISTANCE LOCUS O 4); calmodulin binding	438	SLHSWCKRVKERSKHTRSVCSLDT
AT1G11040.1		DNAJ chaperone C-terminal domain-containing protein	104	YLSSSASSNRRSAFSRSTSRRDEGSSHSGVRSHGLKSRPISN
AT1G11040.1		DNAJ chaperone C-terminal domain-containing protein	187	KQSSPSSISKSASKRDKDERGSTSSA
AT1G11040.1		DNAJ chaperone C-terminal domain-containing protein	215	TSLPYSKSKSTRDTAGSIAKSISRRSTT
AT1G11040.1		DNAJ chaperone C-terminal domain-containing protein	26	TKLHPLSSHRKSESHSDADSAIHRRYL
AT1G11040.1		DNAJ chaperone C-terminal domain-containing protein	66	RRGLRLQSMDDSSVFKRRSSLLSNSSSRRSHTPQAR
AT1G11050.1		protein kinase family protein	208	CLFSLSLRSPLNSKKKRHTV
AT1G11060.1		unknown protein	873	TESRSIRNSIKDYLPKRNLA
AT1G11070.1		LOCATED IN: cellular_component unknown; EXPRESSED IN: inflorescence meristem, flower, root, leaf; EXPRESSED DURING: 4 anthesis, LP.04 four leaves visible, LP.02 two leaves visible, petal differentiation and expansion stage; BEST Arabidopsis thaliana protein match is: proline-rich family protein (TAIR:AT1G61080.1); Has 36868 Blast hits to 20071 proteins in 902 species: Archae - 56; Bacteria - 5524…	168	IIKSKYRSSNIRKNLSDRLV
AT1G11070.1		LOCATED IN: cellular_component unknown; EXPRESSED IN: inflorescence meristem, flower, root, leaf; EXPRESSED DURING: 4 anthesis, LP.04 four leaves visible, LP.02 two leaves visible, petal differentiation and expansion stage; BEST Arabidopsis thaliana protein match is: proline-rich family protein (TAIR:AT1G61080.1); Has 36868 Blast hits to 20071 proteins in 902 species: Archae - 56; Bacteria - 5524…	215	MKKKVSPRSTKTSNDRSESLAKQP
AT1G11090.1		hydrolase, alpha/beta fold family protein	29	SKSFFTSPRGLNLFTRS
AT1G11120.1		unknown protein	219	VKQMKSHVVRQRSPAKSRNRVMVSYPNRR
AT1G11120.1		unknown protein	268	PSATGTRDSTERSERRSRSPAMNRSVMMGPTRS
AT1G11160.1		nucleotide binding	321	NDQSERMGSGPRGSVSPDYETR
AT1G11160.1		nucleotide binding	400	SRDSDSGEESSYSERES
AT1G11160.1		nucleotide binding	514	KPPRIHRSSNSKYNDTRRAMSAD
AT1G11170.1		unknown protein	396	SSSMTKRKSNGNNRRLRRGSSSSHRVKHKRSQETSRTT
AT1G11170.1		unknown protein	4	LPSMKSIKSLKSLVKRKTN
AT1G11170.1		unknown protein	91	SRSDLELKPLWSRGSLRSK
AT1G11170.2		unknown protein	4	LPSMKSIKSLKSLVKRKTN
AT1G11170.2		unknown protein	91	SRSDLELKPLWSRGSLRSK
AT1G11240.1		unknown protein	161	QPVPVRKTKPMKQSRRRSTTKTMKKRDKKKQ
AT1G11270.1		F-box family protein	2	KRDCSSVVGSERERDGSSLALKRHCS
AT1G11270.2		F-box family protein	2	KRDCSSVVGSERERDGSSLALKRHCS
AT1G11270.3		F-box family protein	2	KRDCSSVVGSERERDGSSLALKRHCS
AT1G11300.1		ATP binding / carbohydrate binding / kinase/ protein kinase/ protein serine/threonine kinase/ protein tyrosine kinase/ sugar binding	264	MDYRGSVIRRDWSETRRNWT
AT1G11310.1	MLO2, ATMLO2, PMR2	MLO2 (MILDEW RESISTANCE LOCUS O 2); calmodulin binding	501	RSVENYPSSPSPRYSGH
AT1G11340.1		S-locus lectin protein kinase family protein	227	TRKDGLDRSLTSWKSHGDPGSGDL
AT1G11350.1	CBRLK1, SD1-13, RKS2	SD1-13 (S-DOMAIN-1 13); kinase/ protein kinase/ protein serine/threonine kinase	160	ATDTKTGRSLKLRSWKSPFDPSPGRYSAG
AT1G11360.1		universal stress protein (USP) family protein	0	MTSPGKSPRSDRKSPTVVTVQPSSP
AT1G11360.1		universal stress protein (USP) family protein	156	IMGSRGFGATKRSSKGRLGSVSDYSVHH
AT1G11360.2		universal stress protein (USP) family protein	0	MTSPGKSPRSDRKSPTVVTVQPSSP
AT1G11360.2		universal stress protein (USP) family protein	156	IMGSRGFGATKRSSKGRLGSVSDYSVHH
AT1G11360.3		universal stress protein (USP) family protein	0	MTSPGKSPRSDRKSPTVVTVQPSSP
AT1G11360.3		universal stress protein (USP) family protein	156	IMGSRGFGATKRSSKGRLGSVSDYSVHH
AT1G11390.1		ABC1 family protein	296	HRASLRFQYPGQKSKSS
AT1G11430.1		plastid developmental protein DAG, putative	36	SWTPLLRNISTAGSRRR
AT1G11480.1		eukaryotic translation initiation factor-related	536	SDPKSGIGSSNSFNKSRNNQ
AT1G11480.2		eukaryotic translation initiation factor-related	523	SDPKSGIGSSNSFNKSRNNQ
AT1G11500.1		unknown protein	36	HHHQQHSRHSGSGCRRSPSDGAFA
AT1G11610.1	CYP71A18	CYP71A18; electron carrier/ heme binding / iron ion binding / monooxygenase/ oxygen binding	46	HQLSLHPHRSLHSLSLRYGP
AT1G11630.1		pentatricopeptide (PPR) repeat-containing protein	27	SIFTLKSLTSKQKKSRDTLSLLKSEN
AT1G11650.2	ATRBP45B, RBP45B	RNA-binding protein 45 (RBP45), putative	324	TVRLSWGRSPSNKQSGDPS
AT1G11660.1		heat shock protein, putative	750	SPPAKPEHNGSYGSRKS
AT1G11660.2		heat shock protein, putative	740	SPPAKPEHNGSYGSRKS
AT1G11700.1		unknown protein	148	MMPPHEYLAKSQQRRSRKSGGGGSVFEGVGR
AT1G11700.1		unknown protein	2	RGRKLTMSQSERYLGSS
AT1G11730.1		galactosyltransferase family protein	119	GINTAFSSRKRRDSVRSTWMPQGE
AT1G11740.1		ankyrin repeat family protein	470	DDEKLDRRISSSRPSFSTPSWLR
AT1G11740.1		ankyrin repeat family protein	526	SNSDNSVFTKKSSKNQR
AT1G11750.1	CLPP6, NCLPP1, NCLPP6	CLPP6; serine-type endopeptidase	12	SFSSRTRNPKPTSFLSHNQRN
AT1G11780.1		oxidoreductase, 2OG-Fe(II) oxygenase family protein	161	RSSCKSVSASVLLRKLR
AT1G11860.1		aminomethyltransferase, putative	11	SITRRLAQSDKKVVSRRYFA
AT1G11860.2		aminomethyltransferase, putative	11	SITRRLAQSDKKVVSRRYFA
AT1G11920.1		pectate lyase family protein	160	KPGKSGRVRSSPTHVGSRKGSDGDA
AT1G11950.1		transcription factor	120	LQLVPSSKATSRSRSKKSVSVDTWLVNN
AT1G11950.1		transcription factor	455	RCSSDMSSMKRKAASRDGSSDN
AT1G11960.1		FUNCTIONS IN: molecular_function unknown; INVOLVED IN: biological_process unknown; LOCATED IN: plasma membrane; EXPRESSED IN: 22 plant structures; EXPRESSED DURING: 13 growth stages; CONTAINS InterPro DOMAIN/s: Protein of unknown function DUF221 (InterPro:IPR003864); BEST Arabidopsis thaliana protein match is: early-responsive to dehydration protein-related / ERD protein-related (TAIR:AT1G62320.1…	747	RQSRINTPAVSHASRGSSRSPPS
AT1G12020.1		unknown protein	121	KNKKKNVTGKKDRRKRSGKSSSLLASSSFS
AT1G12120.1		unknown protein	259	TTENNSRIESRRSSSPRALQPSCRTRL
AT1G12140.1	FMO GS-OX5	FMO GS-OX5 (FLAVIN-MONOOXYGENASE GLUCOSINOLATE S-OXYGENASE 5); 8-methylthiopropyl glucosinolate S-oxygenase/ flavin-containing monooxygenase/ monooxygenase	93	VPRPEDDESRDSRRYPSHREVLAYL
AT1G12140.2	FMO GS-OX5	FMO GS-OX5 (FLAVIN-MONOOXYGENASE GLUCOSINOLATE S-OXYGENASE 5); 8-methylthiopropyl glucosinolate S-oxygenase/ flavin-containing monooxygenase/ monooxygenase	93	VPRPEDDESRDSRRYPSHREVLAYL
AT1G12150.1		FUNCTIONS IN: molecular_function unknown; INVOLVED IN: biological_process unknown; LOCATED IN: cellular_component unknown; EXPRESSED IN: 6 plant structures; EXPRESSED DURING: L mature pollen stage, M germinated pollen stage, 4 anthesis, petal differentiation and expansion stage; CONTAINS InterPro DOMAIN/s: Protein of unknown function DUF827, plant (InterPro:IPR008545); BEST Arabidopsis thaliana p…	36	FGEVAVSKQRSTPRRSRLSSESVCDKE
AT1G12220.1	RPS5	RPS5 (RESISTANT TO P. SYRINGAE 5); nucleotide binding	721	REIKIERTTSSSSRNKSPTTPCFSNLSRV
AT1G12250.1		thylakoid lumenal protein-related	8	LPMKSLDISRSSSSVSRSPYHFQRYLLRRLQLS
AT1G12280.1		disease resistance protein (CC-NBS-LRR class), putative	722	EIKIERKTLSLSSNRSPKTQFLHNLS
AT1G12300.1		pentatricopeptide (PPR) repeat-containing protein	45	FSAFSDRNLSYRERLRSGLVD
AT1G12330.1		unknown protein	133	IIKSIFQSLTRRSPKPSSATAALPPRS
AT1G12330.1		unknown protein	251	FLVSVSESRSSIRALSRSLASQLRT
AT1G12330.1		unknown protein	5	SSSPSKSPVPSLHQSLH
AT1G12360.1	KEU	KEU (keule); protein transporter	24	RLLYEMLRSAKTGSSKS
AT1G12360.1	KEU	KEU (keule); protein transporter	563	AAQSMRSRRTPTWAKPRGSDDGYSSDSVLRHAS
AT1G12380.1		unknown protein	214	KKLKSPKPSQTQSLTRS
AT1G12410.1	CLPR2, NCLPP2, CLP2	CLP2 (CLP PROTEASE PROTEOLYTIC SUBUNIT 2); serine-type endopeptidase	47	RVYKSLQSGTGKASRSR
AT1G12430.1	PAK, ARK3	ARK3 (ARMADILLO REPEAT KINESIN 3); ATP binding / binding / microtubule motor	30	SGGQKASVKSKSVLRKSSPAALGGGS
AT1G12430.1	PAK, ARK3	ARK3 (ARMADILLO REPEAT KINESIN 3); ATP binding / binding / microtubule motor	888	SREDIRSLAHRTLTSSP
AT1G12460.1		leucine-rich repeat transmembrane protein kinase, putative	496	CNSRGAAAKSRNSDALSIS
AT1G12480.1	OZS1, SLAC1, RCD3, CDI3	OZS1 (OZONE-SENSITIVE 1); transporter	62	GFSVLNRESRERDDKKSLPRSGRSFGGF
AT1G12520.1	ATCCS	ATCCS (COPPER CHAPERONE FOR SOD1); superoxide dismutase/ superoxide dismutase copper chaperone	36	NPKSQSLNFSFLSRSSPRLLGLSRSFVSSP
AT1G12540.1		basic helix-loop-helix (bHLH) family protein	71	KEVSEKRDRIKRSITHPSSRGEFSIRSL
AT1G12550.1		oxidoreductase family protein	178	SYNSRSQKQSSPYRYYSDI
AT1G12580.1	PEPKR1	PEPKR1 (Phosphoenolpyruvate carboxylase-related kinase 1); ATP binding / kinase/ protein kinase/ protein serine/threonine kinase	461	TRRERGNWSRMSGLHSKRNRT
AT1G12610.1	DDF1	DDF1 (DWARF AND DELAYED FLOWERING 1); DNA binding / sequence-specific DNA binding / transcription factor	137	GSGSGSGSGSEERNSSS
AT1G12620.1		pentatricopeptide (PPR) repeat-containing protein	29	SVSDGKGKVSYRERLRS
AT1G12630.1		DNA binding / transcription activator/ transcription factor	109	EKKAKEKKSSSSKSRARE
AT1G12680.1	PEPKR2	PEPKR2 (Phosphoenolpyruvate carboxylase-related kinase 2); ATP binding / kinase/ protein kinase/ protein serine/threonine kinase	25	SRSSNFRSHFSLEGYAR
AT1G12700.1		helicase domain-containing protein / pentatricopeptide (PPR) repeat-containing protein	581	MKRLTLRYCLSKGSKSRQDLLELSGSE
AT1G12760.1		protein binding / ubiquitin-protein ligase/ zinc ion binding	155	RNRRRTNRTTTTTPPRSRSSS
AT1G12760.2		protein binding / ubiquitin-protein ligase/ zinc ion binding	84	RNRRRTNRTTTTTPPRSRSSS
AT1G12770.1	EMB1586	EMB1586 (embryo defective 1586); ATP binding / ATP-dependent helicase/ helicase/ nucleic acid binding	172	GPLAEKSRSSHSENDKRTEIQA
AT1G12805.1		nucleotide binding	23	GKSMRFGSASSKTPEKRNSYPRISESP
AT1G12850.1		phosphoglycerate/bisphosphoglycerate mutase family protein	167	GVRFTSVFSSPLDRARSMA
AT1G12860.1	SCRM2, ICE2	SCRM2 (SCREAM 2); DNA binding / transcription factor	89	QLKSLSKQWRSTIESRSFEERH
AT1G12880.1	atnudt12	atnudt12 (Arabidopsis thaliana Nudix hydrolase homolog 12); hydrolase	0	MSVLSSRTGRDRQRYDNNFRLVS
AT1G12930.1		importin-related	488	ISVVYRSLADVVGSYSRW
AT1G12960.1		60S ribosomal protein L27A (RPL27aA)	1	TTSRKKTRNLREHVSVGHGRF
AT1G12980.1	ESR1, DRN	ESR1 (ENHANCER OF SHOOT REGENERATION 1); DNA binding / protein binding / transcription factor	123	RFSFSNKKSSPSARCPL
AT1G12980.1	ESR1, DRN	ESR1 (ENHANCER OF SHOOT REGENERATION 1); DNA binding / protein binding / transcription factor	46	IAGAGSSTTRYRGVRRRPWGRYA
AT1G13020.1		eukaryotic translation initiation factor, putative (EIF4B5)	103	YGGGRSSGPPGRMSRDREDSD
AT1G13020.1		eukaryotic translation initiation factor, putative (EIF4B5)	471	RPGSSASRGGSYSERPHSRAGSIDESRSVESMERPRSHGTGDN
AT1G13030.1		sphere organelles protein-related	159	KASKKRKTSSKNQSTKRKK
AT1G13030.1		sphere organelles protein-related	248	LSAETKKTPSRSARRKKAKRQWLREKTK
AT1G13050.1		FUNCTIONS IN: molecular_function unknown; INVOLVED IN: biological_process unknown; EXPRESSED IN: 14 plant structures; EXPRESSED DURING: 9 growth stages; CONTAINS InterPro DOMAIN/s: Harpin-induced 1 (InterPro:IPR010847); BEST Arabidopsis thaliana protein match is: unknown protein (TAIR:AT3G26350.1); Has 384 Blast hits to 355 proteins in 83 species: Archae - 0; Bacteria - 20; Metazoa - 86; Fungi - …	272	RGTFHARSNLGSLMRYS
AT1G13050.2		FUNCTIONS IN: molecular_function unknown; INVOLVED IN: biological_process unknown; LOCATED IN: endomembrane system; EXPRESSED IN: 14 plant structures; EXPRESSED DURING: 9 growth stages; CONTAINS InterPro DOMAIN/s: Harpin-induced 1 (InterPro:IPR010847); BEST Arabidopsis thaliana protein match is: unknown protein (TAIR:AT3G26350.1).	140	RGTFHARSNLGSLMRYS
AT1G13060.1	PBE1	PBE1; endopeptidase/ peptidase/ threonine-type endopeptidase	172	NEGGRLKGDRFSVGSGSPYAY
AT1G13140.1	CYP86C3	CYP86C3; electron carrier/ heme binding / iron ion binding / monooxygenase/ oxygen binding	353	SEILRQRGDSPTSKNESLFT
AT1G13150.1	CYP86C4	CYP86C4; electron carrier/ heme binding / iron ion binding / monooxygenase/ oxygen binding	349	LRQRGDSPTSKNESLFT
AT1G13160.1		SDA1 family protein	295	QAKLQRAVKSIKRKQRSSSENT
AT1G13190.1		RNA recognition motif (RRM)-containing protein	498	TTERDWSENSGDRRHKSHREEKDSHREYKQQRDRDSDEFDRGQSSLKSRSRSRMSEDDHRSRSRDADYGKRRRG
AT1G13195.1		zinc finger (C3HC4-type RING finger) family protein	135	KRLSKKITKEARSSRFSN
AT1G13195.2		zinc finger (C3HC4-type RING finger) family protein	97	KRLSKKITKEARSSRFSN
AT1G13200.1		F-box family protein	60	IRLKSLSKQWRSTIESRSFEERH
AT1G13210.1	ACA.l	ACA.l (autoinhibited Ca2+/ATPase II); ATPase, coupled to transmembrane movement of ions, phosphorylative mechanism / calmodulin binding	283	QNSTDPPSKRSRIERKMDKIIY
AT1G13220.2	LINC2	LINC2 (LITTLE NUCLEI2)	810	IKKSLDGDASGSGGSRRPS
AT1G13220.2	LINC2	LINC2 (LITTLE NUCLEI2)	904	SEGSQLSEFQSSRRGRGRPRKAKPALN
AT1G13280.1	AOC4	AOC4 (ALLENE OXIDE CYCLASE 4); allene-oxide cyclase	31	GFSRSFHNQRISSNSPGLS
AT1G13290.1	DOT5	DOT5 (DEFECTIVELY ORGANIZED TRIBUTARIES 5); transcription factor	122	HGSQYRKGPESLRGTKS
AT1G13340.1		unknown protein	295	DDSSEGEGDVMSESKRSMSDSED
AT1G13350.1		protein kinase family protein	0	MVSDKHVESNHRKHRRSFSPSDEVFKSPKRHKSRHHHRRHGHR
AT1G13350.1		protein kinase family protein	138	DREKDYLRDRDNDRGRSRDKARYSSRERGRENERERRSEKD
AT1G13420.1	ATST4B, ST4B	ST4B (SULFOTRANSFERASE 4B); brassinosteroid sulfotransferase/ sulfotransferase	280	NKTGSLSEGVSFKSFFRK
AT1G13480.1		unknown protein	147	HQRRSSSRYYSATSVASDG
AT1G13480.1		unknown protein	327	NEAGERSNIKRSERFEGGSSHWKSYRC
AT1G13520.1		unknown protein	329	NGERSNIKRSERFEGGSSHWKSYRC
AT1G13600.1	AtbZIP58	AtbZIP58 (Arabidopsis thaliana basic leucine-zipper 58); DNA binding / protein heterodimerization/ protein homodimerization/ transcription factor	169	SFLRELEDSISNSRSDSNQSGRDFE
AT1G13610.1		INVOLVED IN: biological_process unknown; EXPRESSED IN: cotyledon, hypocotyl, root; CONTAINS InterPro DOMAIN/s: Alpha/beta hydrolase fold-1 (InterPro:IPR000073); BEST Arabidopsis thaliana protein match is: unknown protein (TAIR:AT3G30380.2); Has 3358 Blast hits to 3354 proteins in 579 species: Archae - 6; Bacteria - 974; Metazoa - 587; Fungi - 165; Plants - 174; Viruses - 11; Other Eukaryotes - 14…	272	RRQSLANDHKNDKSTKSSWIGSRHS
AT1G13610.1		INVOLVED IN: biological_process unknown; EXPRESSED IN: cotyledon, hypocotyl, root; CONTAINS InterPro DOMAIN/s: Alpha/beta hydrolase fold-1 (InterPro:IPR000073); BEST Arabidopsis thaliana protein match is: unknown protein (TAIR:AT3G30380.2); Has 3358 Blast hits to 3354 proteins in 579 species: Archae - 6; Bacteria - 974; Metazoa - 587; Fungi - 165; Plants - 174; Viruses - 11; Other Eukaryotes - 14…	310	SIDHRFGKPRNSVGSSDRARNSFDRLGE
AT1G13610.2		unknown protein	172	RRQSLANDHKNDKSTKSSWIGSRHS
AT1G13610.2		unknown protein	210	SIDHRFGKPRNSVGSSDRARNSFDRLGE
AT1G13670.1		unknown protein	99	SFLNSLLRSAGLKKKSKSAP
AT1G13700.1		glucosamine/galactosamine-6-phosphate isomerase family protein	131	RQMVRSRTVAASDNSDSPRFD
AT1G13710.1	CYP78A5	CYP78A5; electron carrier/ heme binding / iron ion binding / monooxygenase/ oxygen binding	45	GSSKSRVSIPGPSGSLS
AT1G13780.1		FUNCTIONS IN: molecular_function unknown; INVOLVED IN: biological_process unknown; LOCATED IN: cellular_component unknown; CONTAINS InterPro DOMAIN/s: Cyclin-like F-box (InterPro:IPR001810), FBD (InterPro:IPR013596), FBD-like (InterPro:IPR006566), Leucine-rich repeat 2 (InterPro:IPR013101); BEST Arabidopsis thaliana protein match is: F-box family protein (TAIR:AT5G27750.1); Has 1281 Blast hits to…	202	LHDDKLVVTRVRSRSLKRFSIPFRHKLSL
AT1G13920.1		remorin family protein	221	RETKRQSSEHTSRKDDS
AT1G13920.1		remorin family protein	22	GSSTREKKVSARKSVSFK
AT1G13920.1		remorin family protein	93	HSGLELGPSSSRSKSRSEELLPLEEPRSLSRRFSGQLSFIDSETKDHKPPTLKSPMRKSSSVKKTFSMN
AT1G13940.1		unknown protein	901	GRSWTPTGLTRKKTGSRGRPRRAITIP
AT1G13970.1		unknown protein	186	QDHRKKSSKVVMVSVRRTSIDSKSTPSEFS
AT1G13990.1		unknown protein	21	PVSTSRSVLIRLPSRRSSYLFGLSSSGRRISISRRRHFVSCKSTG
AT1G13990.2		unknown protein	21	PVSTSRSVLIRLPSRRSSYLFGLSSSGRRISISRRRHFVSCKSTG
AT1G13990.3		unknown protein	21	PVSTSRSVLIRLPSRRSSYLFGLSSSGRRISISRRRHFVSCKSTG
AT1G14000.1	VIK	VIK (VH1-INTERACTING KINASE); ATP binding / protein kinase/ protein serine/threonine/tyrosine kinase	22	SPSYDKQKEKARVSRTS
AT1G14070.1	FUT7	FUT7; fucosyltransferase/ transferase, transferring glycosyl groups	48	LSRYQSSLYRKPSPYRTSEYLISKLR
AT1G14080.1	FUT6, ATFUT6	FUT6 (FUCOSYLTRANSFERASE 6); fucosyltransferase/ transferase, transferring glycosyl groups	80	SEYLVSKLRSYEKLHKR
AT1G14100.1	FUT8	FUT8 (FUCOSYLTRANSFERASE 8); galactoside 2-alpha-L-fucosyltransferase	62	SRYESSLYRKPSPYKPSRYLVSKLRSYEMLHKRC
AT1G14110.1	FUT9, ATFUT9	FUT9 (FUCOSYLTRANSFERASE 9); fucosyltransferase	58	EKSCLSRYDQSMSKPSPYKPSRHIVSKLRSYE
AT1G14170.1		KH domain-containing protein	425	TESSSKSKYAKRDDHSKLNSNSKRRNHV
AT1G14170.2		KH domain-containing protein	417	TESSSKSKYAKRDDHSKLNSNSKRRNHV
AT1G14170.3		KH domain-containing protein	450	TESSSKSKYAKRDDHSKLNSNSKRRNHV
AT1G14180.1		protein binding / zinc ion binding	104	GDSEPGRNSSSRRFFLSKP
AT1G14180.1		protein binding / zinc ion binding	185	GLCNRYLSQKSPWGSRSIVRNRDMPV
AT1G14180.1		protein binding / zinc ion binding	295	MINRNRIRKSLSLRGNSSKDFSRKMKRSNSVAME
AT1G14180.1		protein binding / zinc ion binding	9	KSDRSNSTSGDFSFGLH
AT1G14180.2		protein binding / zinc ion binding	134	GLCNRYLSQKSPWGSRSIVRNRDMPV
AT1G14180.2		protein binding / zinc ion binding	244	MINRNRIRKSLSLRGNSSKDFSRKMKRSNSVAME
AT1G14180.2		protein binding / zinc ion binding	53	GDSEPGRNSSSRRFFLSKP
AT1G14205.1		ribosomal protein L18 family protein	43	EARGNTRVESPKTRNRRSRKKFTGTQTKPRLS
AT1G14230.1		nucleoside phosphatase family protein / GDA1/CD39 family protein	24	SPGNHRSSPSTAAKPKSKRTKSII
AT1G14230.1		nucleoside phosphatase family protein / GDA1/CD39 family protein	63	IGYSILRSGRNRRVSLHYSVIID
AT1G14240.1		nucleoside phosphatase family protein / GDA1/CD39 family protein	50	NSNSVISSGSLLSRRCKLRYSVLIDAGSS
AT1G14240.2		nucleoside phosphatase family protein / GDA1/CD39 family protein	50	NSNSVISSGSLLSRRCKLRYSVLIDAGSS
AT1G14240.3		nucleoside phosphatase family protein / GDA1/CD39 family protein	50	NSNSVISSGSLLSRRCKLRYSVLIDAGSS
AT1G14240.4		nucleoside phosphatase family protein / GDA1/CD39 family protein	50	NSNSVISSGSLLSRRCKLRYSVLIDAGSS
AT1G14250.1		nucleoside phosphatase family protein / GDA1/CD39 family protein	53	SNSVMFSASFLRRSSLHYSVIIDAGSS
AT1G14280.1	PKS2	PKS2 (PHYTOCHROME KINASE SUBSTRATE 2)	114	KQSSKNSSETPSLRSES
AT1G14280.1	PKS2	PKS2 (PHYTOCHROME KINASE SUBSTRATE 2)	384	GCKSHKSVRVSGDSYTSMNR
AT1G14330.1		kelch repeat-containing F-box family protein	108	RCSRSGYGSIASLNRSFRSL
AT1G14330.1		kelch repeat-containing F-box family protein	412	SSDRSPPLWTLLGRKHSS
AT1G14370.1	APK2A	APK2A (PROTEIN KINASE 2A); ATP binding / kinase/ protein kinase/ protein serine/threonine kinase	19	ANSASSGSKVSSKTSRS
AT1G14370.1	APK2A	APK2A (PROTEIN KINASE 2A); ATP binding / kinase/ protein kinase/ protein serine/threonine kinase	382	ESPRFHHSSVMQKSPVRYSHDRPLL
AT1G14380.1	IQD28	IQD28 (IQ67 DOMAIN PROTEIN 28); calmodulin binding	261	EKKRPKRSIKKPSGTTSG
AT1G14380.1	IQD28	IQD28 (IQ67 DOMAIN PROTEIN 28); calmodulin binding	304	DPLRNESDKANHNSRKSRSGSKEGSPLEIKDEKPSPSLKRSSLSNGSKKATLRSAE
AT1G14380.1	IQD28	IQD28 (IQ67 DOMAIN PROTEIN 28); calmodulin binding	9	KTLLLGKKSPKSNSDNRSQKLKSAKKEE
AT1G14380.2	IQD28	IQD28 (IQ67 DOMAIN PROTEIN 28); calmodulin binding	261	EKKRPKRSIKKPSGTTSG
AT1G14380.2	IQD28	IQD28 (IQ67 DOMAIN PROTEIN 28); calmodulin binding	304	DPLRNESDKANHNSRKSRSGSKEGSPLEIKDEKPSPSLKRSSLSNGSKKATLRSAE
AT1G14380.2	IQD28	IQD28 (IQ67 DOMAIN PROTEIN 28); calmodulin binding	9	KTLLLGKKSPKSNSDNRSQKLKSAKKEE
AT1G14380.3	IQD28	IQD28 (IQ67 DOMAIN PROTEIN 28); calmodulin binding	261	EKKRPKRSIKKPSGTTSG
AT1G14380.3	IQD28	IQD28 (IQ67 DOMAIN PROTEIN 28); calmodulin binding	304	DPLRNESDKANHNSRKSRSGSKEGSPLEIKDEKPSPSLKRSSLSNGSKKATLRSAE
AT1G14380.3	IQD28	IQD28 (IQ67 DOMAIN PROTEIN 28); calmodulin binding	9	KTLLLGKKSPKSNSDNRSQKLKSAKKEE
AT1G14400.1	UBC1, ATUBC1	UBC1 (UBIQUITIN CARRIER PROTEIN 1); ubiquitin-protein ligase	123	SEAARMYSESKREYNRR
AT1G14400.2	UBC1, ATUBC1	UBC1 (UBIQUITIN CARRIER PROTEIN 1); ubiquitin-protein ligase	123	SEAARMYSESKREYNRR
AT1G14420.1	AT59	AT59; lyase/ pectate lyase	75	ESRNDTRRELTQVRSGRKTHKSS
AT1G14460.1		DNA polymerase-related	1079	NTQKSPRRTKIKGTSMRSRRSRERRFSLFSACARPR
AT1G14460.1		DNA polymerase-related	211	LKLKRKNWSRSSSKFLRGTSKREDSS
AT1G14460.1		DNA polymerase-related	298	RGGCRSCCSPSFSDTLRRKGSSILCGSQSVYRRHRHSSGRFNKQKLALRSA
AT1G14460.1		DNA polymerase-related	776	PSPGTTHTGSSRRQSSRATEESISREV
AT1G14510.1	AL7	AL7 (ALFIN-LIKE 7); DNA binding / methylated histone residue binding	141	KQSKDQSANHNSSRSKSSGGKPRHSESHTKASKMSPPPR
AT1G14570.1		UBX domain-containing protein	300	ASLSKKRPRGSFSLTPHSKPKED
AT1G14570.2		UBX domain-containing protein	300	ASLSKKRPRGSFSLTPHSKPKED
AT1G14570.3		UBX domain-containing protein	279	ASLSKKRPRGSFSLTPHSKPKED
AT1G14570.4		UBX domain-containing protein	279	ASLSKKRPRGSFSLTPHSKPKED
AT1G14600.1		DNA binding / transcription factor	81	LLGKPEESSSPSSRRRRRQDNEEDHLHD
AT1G14610.1	TWN2, VALRS	TWN2 (TWIN 2); ATP binding / aminoacyl-tRNA ligase/ nucleotide binding / valine-tRNA ligase	34	LVRSFHGSRTMSESEKKIL
AT1G14680.1		unknown protein	250	RQCSAERSHGSNKFNKRKSIKMMSSP
AT1G14690.1	MAP65-7	MAP65-7 (MICROTUBULE-ASSOCIATED PROTEIN 65-7)	498	LLIKRRESIYGSKPSPRRSNSVRKTNGYNGDAS
AT1G14690.1	MAP65-7	MAP65-7 (MICROTUBULE-ASSOCIATED PROTEIN 65-7)	552	RSYSSHRQNGYFKEVRR
AT1G14690.2	MAP65-7	MAP65-7 (MICROTUBULE-ASSOCIATED PROTEIN 65-7)	498	LLIKRRESIYGSKPSPRRSNSVRKTNGYNGDAS
AT1G14690.2	MAP65-7	MAP65-7 (MICROTUBULE-ASSOCIATED PROTEIN 65-7)	552	RSYSSHRQNGYFKEVRR
AT1G14740.1		unknown protein	49	RSNNLDGGFSSKSSPRS
AT1G14750.1	SDS	SDS (SOLO DANCERS); cyclin-dependent protein kinase	101	IGDSKFRRITRSYSKLHKEKEGD
AT1G14750.1	SDS	SDS (SOLO DANCERS); cyclin-dependent protein kinase	158	SFSRSDVTFAGHVSNSRSLN
AT1G14750.1	SDS	SDS (SOLO DANCERS); cyclin-dependent protein kinase	294	EFSEKSSSDSPISHSRSLYLQ
AT1G14750.2	SDS	SDS (SOLO DANCERS); cyclin-dependent protein kinase	126	EFSEKSSSDSPISHSRSLYLQ
AT1G14780.1		FUNCTIONS IN: molecular_function unknown; INVOLVED IN: biological_process unknown; LOCATED IN: cellular_component unknown; EXPRESSED IN: 13 plant structures; EXPRESSED DURING: 6 growth stages; CONTAINS InterPro DOMAIN/s: Membrane attack complex component/perforin/complement C9 (InterPro:IPR001862); BEST Arabidopsis thaliana protein match is: unknown protein (TAIR:AT4G24290.2); Has 119 Blast hits …	490	KKHGSKSVLHLRLRYTKVSDH
AT1G14790.1	RDR1, ATRDRP1	RDR1 (RNA-DEPENDENT RNA POLYMERASE 1); RNA-directed RNA polymerase/ nucleic acid binding	411	EKVRSMDLSPRSSTQRRTKLYDR
AT1G14790.1	RDR1, ATRDRP1	RDR1 (RNA-DEPENDENT RNA POLYMERASE 1); RNA-directed RNA polymerase/ nucleic acid binding	575	VDPNSSKKLSLRKSMSKFESEN
AT1G14810.1		semialdehyde dehydrogenase family protein	63	PYSSIKMLASKRSAGKRV
AT1G14840.1	ATMAP70-4	ATMAP70-4 (microtubule-associated proteins 70-4); microtubule binding	12	ISASYREGGSKGMSRRRSMRPSFDADNEFM
AT1G14840.1	ATMAP70-4	ATMAP70-4 (microtubule-associated proteins 70-4); microtubule binding	374	SRGTSVGRSSSNGPTRRQ
AT1G14840.1	ATMAP70-4	ATMAP70-4 (microtubule-associated proteins 70-4); microtubule binding	431	AKGTSRSFDGGTRSLDRSKVLI
AT1G14840.1	ATMAP70-4	ATMAP70-4 (microtubule-associated proteins 70-4); microtubule binding	456	RSNFPLNHKSSEGTSRGESPSSIKG
AT1G14850.1	NUP155	NUP155; nucleocytoplasmic transporter	1383	AMSVLSDRMGSSPTRSSL
AT1G14850.1	NUP155	NUP155; nucleocytoplasmic transporter	447	QAGSSSGPSSRSSRALREVVSS
AT1G14970.1		unknown protein	17	SDHTTPSPPTSPHLCRSRSKSSSVSGQQQSRNV
AT1G14970.1		unknown protein	509	PKLGWKSFKRQMLSMRSHSDSKGFELKRSSDS
AT1G15020.1	ATQSOX1, QSO2	thioredoxin family protein	17	AASFSPGSRSILRDIGSNV
AT1G15020.2	ATQSOX1, QSO2	thioredoxin family protein	17	AASFSPGSRSILRDIGSNV
AT1G15060.1		LOCATED IN: chloroplast; EXPRESSED IN: 23 plant structures; EXPRESSED DURING: 14 growth stages; CONTAINS InterPro DOMAIN/s: Uncharacterised conserved protein UCP031088, alpha/beta hydrolase, At1g15070 (InterPro:IPR016969); BEST Arabidopsis thaliana protein match is: unknown protein (TAIR:AT1G73750.1); Has 120 Blast hits to 104 proteins in 29 species: Archae - 0; Bacteria - 61; Metazoa - 1; Fungi …	11	IRSALRRASSTVYLHRSI
AT1G15100.1	RHA2A	RHA2A; protein binding / ubiquitin-protein ligase/ zinc ion binding	127	RSALVSDDCVSKTQRSV
AT1G15180.2		MATE efflux family protein	344	MRMATYRSLHKLRSFLSLGDTHC
AT1G15200.1		protein-protein interaction regulator family protein	108	SDQSDKKQSGLHRGSWS
AT1G15210.1	PDR7, ATPDR7	PDR7 (PLEIOTROPIC DRUG RESISTANCE 7); ATPase, coupled to transmembrane movement of substances	5	AHAMSRGGSMRQTISRSVSKASRNMED
AT1G15240.1		phox (PX) domain-containing protein	352	LSKDPLLSMDTRSSRSWNSFPSTSKIGDGSK
AT1G15240.1		phox (PX) domain-containing protein	523	LENSGRSLKKTSKGHERYQ
AT1G15240.2		phox (PX) domain-containing protein	352	LSKDPLLSMDTRSSRSWNSFPSTSKIGDGSK
AT1G15240.2		phox (PX) domain-containing protein	523	LENSGRSLKKTSKGHERYQ
AT1G15260.1		unknown protein	155	EFSDPRTSAKINGSRRKAGSFR
AT1G15280.1		glycine-rich protein	173	RGHGRGRGQGRGYARGSSSNT
AT1G15280.1		glycine-rich protein	238	NGSQNSREKMPHLDSRRSPTAP
AT1G15280.1		glycine-rich protein	389	VVRSLSSSPQKTSLSRNRYP
AT1G15280.1		glycine-rich protein	561	VSERQSNNPSKQPRRYS
AT1G15280.2		glycine-rich protein	174	RGHGRGRGQGRGYARGSSSNT
AT1G15280.2		glycine-rich protein	239	NGSQNSREKMPHLDSRRSPTAP
AT1G15280.2		glycine-rich protein	390	VVRSLSSSPQKTSLSRNRYP
AT1G15280.2		glycine-rich protein	562	VSERQSNNPSKQPRRYS
AT1G15290.1		binding	1250	SPLQKTSKGPSLSKSSPRRALKNA
AT1G15290.1		binding	1390	GSYRGKKTSDISRTKLS
AT1G15320.1		unknown protein	47	REAASNISSKRSHAERSHQHESFTKGD
AT1G15320.2		unknown protein	29	REAASNISSKRSHAERSHQHESFTKGD
AT1G15360.1	SHN1, WIN1	SHN1 (SHINE 1); DNA binding / sequence-specific DNA binding / transcription factor	121	SSHIGVWQKRAGSKSDSS
AT1G15430.1		FUNCTIONS IN: molecular_function unknown; INVOLVED IN: biological_process unknown; LOCATED IN: cellular_component unknown; EXPRESSED IN: 24 plant structures; EXPRESSED DURING: 15 growth stages; CONTAINS InterPro DOMAIN/s: Protein of unknown function DUF1644 (InterPro:IPR012866); BEST Arabidopsis thaliana protein match is: zinc ion binding (TAIR:AT1G80220.1); Has 144 Blast hits to 135 proteins in …	7	MPVSSNRNRVSPYPLRSCRNKKQKE
AT1G15430.1		FUNCTIONS IN: molecular_function unknown; INVOLVED IN: biological_process unknown; LOCATED IN: cellular_component unknown; EXPRESSED IN: 24 plant structures; EXPRESSED DURING: 15 growth stages; CONTAINS InterPro DOMAIN/s: Protein of unknown function DUF1644 (InterPro:IPR012866); BEST Arabidopsis thaliana protein match is: zinc ion binding (TAIR:AT1G80220.1); Has 144 Blast hits to 135 proteins in …	84	RHSNCFKQYRRSNSSSRCSGKTLHCP
AT1G15430.2		FUNCTIONS IN: molecular_function unknown; INVOLVED IN: biological_process unknown; LOCATED IN: cellular_component unknown; EXPRESSED IN: 24 plant structures; EXPRESSED DURING: 15 growth stages; CONTAINS InterPro DOMAIN/s: Protein of unknown function DUF1644 (InterPro:IPR012866); BEST Arabidopsis thaliana protein match is: zinc ion binding (TAIR:AT1G80220.1); Has 144 Blast hits to 135 proteins in …	7	MPVSSNRNRVSPYPLRSCRNKKQKE
AT1G15430.2		FUNCTIONS IN: molecular_function unknown; INVOLVED IN: biological_process unknown; LOCATED IN: cellular_component unknown; EXPRESSED IN: 24 plant structures; EXPRESSED DURING: 15 growth stages; CONTAINS InterPro DOMAIN/s: Protein of unknown function DUF1644 (InterPro:IPR012866); BEST Arabidopsis thaliana protein match is: zinc ion binding (TAIR:AT1G80220.1); Has 144 Blast hits to 135 proteins in …	84	RHSNCFKQYRRSNSSSRCSGKTLHCP
AT1G15460.1	ATBOR4, BOR4	BOR4 (REQUIRES HIGH BORON 4); anion exchanger	220	LKSRKARSWRYGTGWYRSFI
AT1G15520.1	PDR12, ATPDR12	PDR12 (PLEIOTROPIC DRUG RESISTANCE 12); ATPase, coupled to transmembrane movement of substances	9	SNSMRRNSSVWKKDSGREIFSRSSR
AT1G15580.1	IAA5, ATAUX2-27, AUX2-27	IAA5 (INDOLE-3-ACETIC ACID INDUCIBLE 5); transcription factor	57	PPVCSYRRKNSLERTKSSYVKVS
AT1G15590.1		FUNCTIONS IN: molecular_function unknown; INVOLVED IN: biological_process unknown; LOCATED IN: cellular_component unknown; BEST Arabidopsis thaliana protein match is: zinc finger (C3HC4-type RING finger) family protein (TAIR:AT1G80400.1); Has 118 Blast hits to 117 proteins in 7 species: Archae - 0; Bacteria - 0; Metazoa - 0; Fungi - 0; Plants - 118; Viruses - 0; Other Eukaryotes - 0 (source: NCBI…	20	DSSSRSSLDERSYPSLSSSL
AT1G15660.1	CENP-C	CENP-C (CENTROMERE PROTEIN C)	542	PEVHKYSHKQTNKRRKRGSSDSNVKKRSKTVHG
AT1G15660.1	CENP-C	CENP-C (CENTROMERE PROTEIN C)	675	GEGKRDSRASKVKSFVSDEYK
AT1G15660.1	CENP-C	CENP-C (CENTROMERE PROTEIN C)	85	NKRERRPGLDRKRKSFSLHLTTSQPP
AT1G15710.1		prephenate dehydrogenase family protein	125	STESVLRSFPFQRLRRSTLF
AT1G15730.1		PRLI-interacting factor L, putative	41	RTKSSSFYSAALYSDSRRRFHSAVASDSSLA
AT1G15740.1		leucine-rich repeat family protein	31	YSKSSSSKWLATSLSRSGSDVKRKNG
AT1G15760.1		FUNCTIONS IN: molecular_function unknown; INVOLVED IN: biological_process unknown; LOCATED IN: cellular_component unknown; CONTAINS InterPro DOMAIN/s: Sterile alpha motif homology (InterPro:IPR010993); BEST Arabidopsis thaliana protein match is: unknown protein (TAIR:AT1G80520.1); Has 30 Blast hits to 30 proteins in 7 species: Archae - 0; Bacteria - 0; Metazoa - 0; Fungi - 0; Plants - 30; Viruses…	56	EILKLARRDRKNSPPLTSRSISRVVT
AT1G15772.1		unknown protein	67	FRRNRFRSNKDQSTLTSSK
AT1G15800.1		unknown protein	114	QTSVTTSPFKRSRKKKTLA
AT1G15860.1		INVOLVED IN: biological_process unknown; EXPRESSED IN: 23 plant structures; EXPRESSED DURING: 13 growth stages; CONTAINS InterPro DOMAIN/s: Defective in cullin neddylation (InterPro:IPR014764), Protein of unknown function DUF298 (InterPro:IPR005176); BEST Arabidopsis thaliana protein match is: unknown protein (TAIR:AT3G12760.1); Has 576 Blast hits to 576 proteins in 121 species: Archae - 0; Bacte…	0	MRRSSSKKKSGQSTESVT
AT1G15860.2		INVOLVED IN: biological_process unknown; EXPRESSED IN: 23 plant structures; EXPRESSED DURING: 13 growth stages; CONTAINS InterPro DOMAIN/s: Defective in cullin neddylation (InterPro:IPR014764), Protein of unknown function DUF298 (InterPro:IPR005176); BEST Arabidopsis thaliana protein match is: unknown protein (TAIR:AT3G12760.1).	0	MRRSSSKKKSGQSTESVT
AT1G15870.1		mitochondrial glycoprotein family protein / MAM33 family protein	38	SSRKFLSSGSYVSEMRRT
AT1G15900.1		unknown protein	31	IFSTLASFSRYSFLRRHSIWIGS
AT1G15910.1		XH/XS domain-containing protein / XS zinc finger domain-containing protein	194	GSSKKEWTERSGDSESK
AT1G15940.1		binding	291	EDKLNLGLSRKGTRSKRSARGGTRRANGDEKV
AT1G15940.1		binding	399	SVVISLSSSGRARTGSRKRSRTKMEETDHDVSS
AT1G15960.1	NRAMP6, ATNRAMP6	NRAMP6; inorganic anion transmembrane transporter/ metal ion transmembrane transporter	7	GSNRSISNSPLIENSDS
AT1G15970.1		methyladenine glycosylase family protein	107	SSCKKVVRRSGSVSSTRKLSVGKE
AT1G15980.1	NDF1	NDF1 (NDH-DEPENDENT CYCLIC ELECTRON FLOW 1)	34	RLTSRSSDVSVNLKKKN
AT1G15990.1	ATCNGC7, CNGC7	ATCNGC7 (CYCLIC NUCLEOTIDE GATED CHANNEL 7); calmodulin binding / cyclic nucleotide binding / ion channel	651	DKRPMVITRSESSSRLRSTIFASRF
AT1G16010.1		magnesium transporter CorA-like family protein (MRS2-1)	146	EMWQQENSQLSRRRSRSFDNAFENSSPDY
AT1G16010.1		magnesium transporter CorA-like family protein (MRS2-1)	286	SVSAPVSPVSSPPDSRRLDKSLSIARSRHDSARSSEGAE
AT1G16010.2		magnesium transporter CorA-like family protein (MRS2-1)	146	EMWQQENSQLSRRRSRSFDNAFENSSPDY
AT1G16010.2		magnesium transporter CorA-like family protein (MRS2-1)	286	SVSAPVSPVSSPPDSRRLDKSLSIARSRHDSARSSEGAE
AT1G16020.1		unknown protein	271	SSRSNLAPVGSIDSLHSRN
AT1G16020.2		unknown protein	258	SSRSNLAPVGSIDSLHSRN
AT1G16060.1		ovule development protein, putative	134	MESQSKEEYIGSLRRKSSGFSRGVSKYRGVAK
AT1G16060.1		ovule development protein, putative	53	QRSSVHRGVTRHRWTGRY
AT1G16060.2		ovule development protein, putative	64	MESQSKEEYIGSLRRKSSGFSRGVSKYRGVAK
AT1G16070.1	AtTLP8	AtTLP8 (TUBBY LIKE PROTEIN 8); transcription factor	167	LSHGSVYSLYTHEGRGRKDRKLAV
AT1G16070.2	AtTLP8	AtTLP8 (TUBBY LIKE PROTEIN 8); transcription factor	167	LSHGSVYSLYTHEGRGRKDRKLAV
AT1G16080.1		unknown protein	10	VSCSASARFSFLRRSESLKPSVSRARFAVP
AT1G16120.1	WAKL1	WAKL1 (wall associated kinase-like 1); kinase	258	SRFKSLLGCTNMSRKGS
AT1G16310.1		cation efflux family protein	72	STGGRHDGRTRFSRYFRTPRKERRVSEYYKKQER
AT1G16330.1	CYCB3;1	CYCB3;1 (cyclin b3;1); cyclin-dependent protein kinase	25	TSLQNRSSLKKPPVGRSKSRSISSIPSSAVAS
AT1G16330.1	CYCB3;1	CYCB3;1 (cyclin b3;1); cyclin-dependent protein kinase	87	TKVLDVTAKPKSKRRKSFTSLLVNGSKF
AT1G16340.1	ATKDSA2, ATKSDA	ATKDSA2; 3-deoxy-8-phosphooctulonate synthase	52	FKSSFDKANRTSSKSFRG
AT1G16340.2	ATKDSA2, ATKSDA	ATKDSA2; 3-deoxy-8-phosphooctulonate synthase	52	FKSSFDKANRTSSKSFRG
AT1G16340.3	ATKDSA2, ATKSDA	ATKDSA2; 3-deoxy-8-phosphooctulonate synthase	52	FKSSFDKANRTSSKSFRG
AT1G16440.1		kinase	303	LQSSKKNRKSKSDFDGSLPE
AT1G16510.1		auxin-responsive family protein	5	RRLSRVADSSSEFSIRRSTSSFRNRRGHHRLHAPPP
AT1G16520.1		unknown protein	202	ISTSVSPRGYSAAGSPKRTSGAVSPTK
AT1G16540.1	SIR3, LOS5, ABA3, ATABA3	ABA3 (ABA DEFICIENT 3); Mo-molybdopterin cofactor sulfurase/ selenocysteine lyase	653	RYSSSTSKDCLNRNKSP
AT1G16610.1	SR45	SR45; RNA binding / protein binding	0	MAKPSRGRRSPSVSGSSSRSSSRSRSGSSPSRSISRSRSRSRSLSSSSSPSRSVSSGSRSPPRRGKSPAGPARRGRSPPPPPSKGASSPSKK
AT1G16610.1	SR45	SR45; RNA binding / protein binding	211	PRRPRETSPQRKTGLSPRRRSPLPRRGLSPRRRSPDSPHRRRPGSPIRRRGDTPPRRRPASPSRGRSPSSPPPRRYRSPPRGSPRRIRGSPVRRRSPLPLRRRSPPPRRLRSPPRRSPIRRRSRSPIRRPGRSRSSSISPRKGRGPAGRRGRSSSYSSSPSPRRIPRKISRSRSPKRPLRGKRSSSNSSSSS
AT1G16610.2	SR45	SR45; RNA binding / protein binding	0	MAKPSRGRRSPSVSGSSSRSSSRSRSGSSPSRSISRSRSRSRSLSSSSSPSRSVSSGSRSPPRRGKSPAGPARRGRSPPPPPSKGASSPSKK
AT1G16610.2	SR45	SR45; RNA binding / protein binding	208	DGGPRRPRERLSPRRRSPLPRRGLSPRRRSPDSPHRRRPGSPIRRRGDTPPRRRPASPSRGRSPSSPPPRRYRSPPRGSPRRIRGSPVRRRSPLPLRRRSPPPRRLRSPPRRSPIRRRSRSPIRRPGRSRSSSISPRKGRGPAGRRGRSSSYSSSPSPRRIPRKISRSRSPKRPLRGKRSSSNSSSSS
AT1G16680.1		DNAJ heat shock N-terminal domain-containing protein / S-locus protein, putative	317	SHQNSAAYRSEESRRIH
AT1G16680.1		DNAJ heat shock N-terminal domain-containing protein / S-locus protein, putative	472	ETSKRRKSWSPFKLTKKQSRRTS
AT1G16710.1	HAC12	HAC12 (histone acetyltransferase of the CBP family 12); H3/H4 histone acetyltransferase/ histone acetyltransferase/ transcription cofactor	898	SPELTSKSRKPKIKGVS
AT1G16720.1	HCF173	HCF173 (high chlorophyll fluorescence phenotype 173); binding / catalytic/ transcription repressor	48	SSSPSPSPPSDKKKTKTRP
AT1G16750.1		FUNCTIONS IN: molecular_function unknown; INVOLVED IN: biological_process unknown; LOCATED IN: cellular_component unknown; EXPRESSED IN: 23 plant structures; EXPRESSED DURING: 13 growth stages; CONTAINS InterPro DOMAIN/s: Protein of unknown function DUF547 (InterPro:IPR006869); BEST Arabidopsis thaliana protein match is: transcription factor (TAIR:AT3G13000.2); Has 420 Blast hits to 403 proteins …	224	WSPSEHSRISRWAQSPR
AT1G16760.1		protein kinase family protein	419	VLKESDSFSRHSIVRYRKYSVQE
AT1G16780.1		vacuolar-type H+-translocating inorganic pyrophosphatase, putative	15	SDKPRTFPDMRSKTYSP
AT1G16800.1		tRNA-splicing endonuclease positive effector-related	1281	ESKSNKGADSSALLRSNL
AT1G16800.1		tRNA-splicing endonuclease positive effector-related	1738	KQHSRRKEQRAETSSDRKLRKT
AT1G16800.1		tRNA-splicing endonuclease positive effector-related	1767	SSKGSESKHTRRNAKEE
AT1G16800.1		tRNA-splicing endonuclease positive effector-related	1909	PPKRPLSPGSTAGSHTR
AT1G16830.1		FUNCTIONS IN: molecular_function unknown; INVOLVED IN: biological_process unknown; LOCATED IN: mitochondrion; CONTAINS InterPro DOMAIN/s: Pentatricopeptide repeat (InterPro:IPR002885); BEST Arabidopsis thaliana protein match is: MEE40 (maternal effect embryo arrest 40) (TAIR:AT3G53700.1); Has 16848 Blast hits to 5324 proteins in 149 species: Archae - 2; Bacteria - 6; Metazoa - 176; Fungi - 119; P…	564	VYSLLSRYRGDFSEFRSVF
AT1G16840.1		unknown protein	0	MARSFSRSLSLSKGRFAAASSS
AT1G16840.1		unknown protein	23	LPSSHLVSFRSQSSDRRGDLYEIDTS
AT1G16840.2		unknown protein	0	MARSFSRSLSLSKGRFAAASSS
AT1G16840.2		unknown protein	23	LPSSHLVSFRSQSSDRRGDLYEIDTS
AT1G16840.3		unknown protein	0	MARSFSRSLSLSKGRFAAASSS
AT1G16840.3		unknown protein	23	LPSSHLVSFRSQSSDRRGDLYEIDTS
AT1G16840.4		unknown protein	0	MARSFSRSLSLSKGRFAAASSS
AT1G16840.4		unknown protein	23	LPSSHLVSFRSQSSDRRGDLYEIDTS
AT1G16860.1		merozoite surface protein-related	59	KSRKSGPIPGAPSRSGSF
AT1G16860.1		merozoite surface protein-related	91	GRMSGSLASAGSVSMKKTNS
AT1G16870.1		mitochondrial 28S ribosomal protein S29-related	57	KSSITKTKKSEGKKSKPKG
AT1G16905.1		sugar binding	171	LDGSKNKLVSRNNGSYSL
AT1G16910.1	LSH8	LSH8 (LIGHT SENSITIVE HYPOCOTYLS 8)	14	EGPPPTLSRYESQKSRD
AT1G16930.1		F-box family protein	208	RSQSLKSFKIDSERYES
AT1G16940.1		F-box family protein	280	QDYRHFSKSKSLPKFHKLSVLSV
AT1G17000.1	ATTPS3, TPS3	ATTPS3; alpha,alpha-trehalose-phosphate synthase (UDP-forming)	699	ESEILSPKLSHETRSKSSSSNH
AT1G17070.1		D111/G-patch domain-containing protein	47	AESDSDSDDSGGGGSRRKRRKDRDSGRKADLTKPV
AT1G17110.1	UBP15	UBP15 (UBIQUITIN-SPECIFIC PROTEASE 15); ubiquitin-specific protease	266	ASAGGDNKTSHIKHKSRGNSY
AT1G17110.1	UBP15	UBP15 (UBIQUITIN-SPECIFIC PROTEASE 15); ubiquitin-specific protease	459	KPLVAYLLRRSHSRSCSGKDWCLM
AT1G17120.1	CAT8	CAT8 (CATIONIC AMINO ACID TRANSPORTER 8); basic amino acid transmembrane transporter/ cationic amino acid transmembrane transporter	7	EAHQLESRSDDLSQRRSYWRWRKQD
AT1G17140.1		tropomyosin-related	33	TTDQSFKPGVDRKSPRSGGPNSDPL
AT1G17140.2		tropomyosin-related	33	TTDQSFKPGVDRKSPRSGGPNSDPL
AT1G17160.1		pfkB-type carbohydrate kinase family protein	32	NPAQSRFSRPRSLRVLSLSADPSA
AT1G17160.2		pfkB-type carbohydrate kinase family protein	32	NPAQSRFSRPRSLRVLSLSADPSA
AT1G17210.1		zinc ion binding	23	SASASATPVDRFRRRARSPSPPQTAAASS
AT1G17210.1		zinc ion binding	467	GDRAASYESRGPSTRKRSLDDGGST
AT1G17210.1		zinc ion binding	761	SQDRVSQSVVRADSGSK
AT1G17220.1	FUG1	FUG1 (fu-gaeri1); translation initiation factor	372	DDGDDDASISRSGRKGRKWSKASRKAVRLQ
AT1G17220.1	FUG1	FUG1 (fu-gaeri1); translation initiation factor	43	SLSRRSVKGTKKWLCRYSVS
AT1G17220.1	FUG1	FUG1 (fu-gaeri1); translation initiation factor	77	NNNSVSIDSNSFRGSKDGDDSE
AT1G17260.1	AHA10	AHA10 (Autoinhibited H(+)-ATPase isoform 10); ATPase/ ATPase, coupled to transmembrane movement of ions, phosphorylative mechanism / cation-transporting ATPase	873	GKDDGSPNVTISQRSRSAEELRGSRSRASWIA
AT1G17340.1		phosphoinositide phosphatase family protein	239	TIIARRSRHYAGTRYLRRGVND
AT1G17340.1		phosphoinositide phosphatase family protein	726	ERGSSKSVSSDNLFTDRD
AT1G17360.1		FUNCTIONS IN: molecular_function unknown; INVOLVED IN: biological_process unknown; LOCATED IN: cellular_component unknown; EXPRESSED IN: 22 plant structures; EXPRESSED DURING: 13 growth stages; BEST Arabidopsis thaliana protein match is: COP1-interacting protein-related (TAIR:AT1G72410.1); Has 8834 Blast hits to 6495 proteins in 406 species: Archae - 8; Bacteria - 626; Metazoa - 3389; Fungi - 793…	1037	DGDFKRSFFSLSTFRSKGNDSK
AT1G17360.1		FUNCTIONS IN: molecular_function unknown; INVOLVED IN: biological_process unknown; LOCATED IN: cellular_component unknown; EXPRESSED IN: 22 plant structures; EXPRESSED DURING: 13 growth stages; BEST Arabidopsis thaliana protein match is: COP1-interacting protein-related (TAIR:AT1G72410.1); Has 8834 Blast hits to 6495 proteins in 406 species: Archae - 8; Bacteria - 626; Metazoa - 3389; Fungi - 793…	390	VAQSSVMFPYRHSRSRSAHIAGG
AT1G17360.1		FUNCTIONS IN: molecular_function unknown; INVOLVED IN: biological_process unknown; LOCATED IN: cellular_component unknown; EXPRESSED IN: 22 plant structures; EXPRESSED DURING: 13 growth stages; BEST Arabidopsis thaliana protein match is: COP1-interacting protein-related (TAIR:AT1G72410.1); Has 8834 Blast hits to 6495 proteins in 406 species: Archae - 8; Bacteria - 626; Metazoa - 3389; Fungi - 793…	438	LTSPPKPVSAGSEQRQKSFGV
AT1G17360.1		FUNCTIONS IN: molecular_function unknown; INVOLVED IN: biological_process unknown; LOCATED IN: cellular_component unknown; EXPRESSED IN: 22 plant structures; EXPRESSED DURING: 13 growth stages; BEST Arabidopsis thaliana protein match is: COP1-interacting protein-related (TAIR:AT1G72410.1); Has 8834 Blast hits to 6495 proteins in 406 species: Archae - 8; Bacteria - 626; Metazoa - 3389; Fungi - 793…	607	SSTRQRAEKFRSFNSRTSSKKYQHPIS
AT1G17360.1		FUNCTIONS IN: molecular_function unknown; INVOLVED IN: biological_process unknown; LOCATED IN: cellular_component unknown; EXPRESSED IN: 22 plant structures; EXPRESSED DURING: 13 growth stages; BEST Arabidopsis thaliana protein match is: COP1-interacting protein-related (TAIR:AT1G72410.1); Has 8834 Blast hits to 6495 proteins in 406 species: Archae - 8; Bacteria - 626; Metazoa - 3389; Fungi - 793…	657	SKSSQVRKVPSPNGSSRVSKPSG
AT1G17360.1		FUNCTIONS IN: molecular_function unknown; INVOLVED IN: biological_process unknown; LOCATED IN: cellular_component unknown; EXPRESSED IN: 22 plant structures; EXPRESSED DURING: 13 growth stages; BEST Arabidopsis thaliana protein match is: COP1-interacting protein-related (TAIR:AT1G72410.1); Has 8834 Blast hits to 6495 proteins in 406 species: Archae - 8; Bacteria - 626; Metazoa - 3389; Fungi - 793…	746	DIPSPVMPRRPRSLRKSFSANIEFTE
AT1G17360.1		FUNCTIONS IN: molecular_function unknown; INVOLVED IN: biological_process unknown; LOCATED IN: cellular_component unknown; EXPRESSED IN: 22 plant structures; EXPRESSED DURING: 13 growth stages; BEST Arabidopsis thaliana protein match is: COP1-interacting protein-related (TAIR:AT1G72410.1); Has 8834 Blast hits to 6495 proteins in 406 species: Archae - 8; Bacteria - 626; Metazoa - 3389; Fungi - 793…	923	DDSPMGSPASWSSRMRKKW
AT1G17360.1		FUNCTIONS IN: molecular_function unknown; INVOLVED IN: biological_process unknown; LOCATED IN: cellular_component unknown; EXPRESSED IN: 22 plant structures; EXPRESSED DURING: 13 growth stages; BEST Arabidopsis thaliana protein match is: COP1-interacting protein-related (TAIR:AT1G72410.1); Has 8834 Blast hits to 6495 proteins in 406 species: Archae - 8; Bacteria - 626; Metazoa - 3389; Fungi - 793…	995	YRSSDELRKSRMASSQS
AT1G17380.1	JAZ5, TIFY11A	JAZ5 (JASMONATE-ZIM-DOMAIN PROTEIN 5)	18	TRRCSLLSRYLKEKGSFG
AT1G17400.1		unknown protein	180	ESKNNKKKRDISKNSVSY
AT1G17430.1		hydrolase, alpha/beta fold family protein	116	GKSYSKNRDRSVEIQARSVVG
AT1G17450.1		FUNCTIONS IN: molecular_function unknown; CONTAINS InterPro DOMAIN/s: B-block binding subunit of TFIIIC (InterPro:IPR007309); BEST Arabidopsis thaliana protein match is: transcription factor-related (TAIR:AT1G59453.1); Has 39 Blast hits to 33 proteins in 8 species: Archae - 0; Bacteria - 3; Metazoa - 0; Fungi - 0; Plants - 32; Viruses - 0; Other Eukaryotes - 4 (source: NCBI BLink).	1194	KDTSRRSGHYRLHQTVR
AT1G17450.1		FUNCTIONS IN: molecular_function unknown; CONTAINS InterPro DOMAIN/s: B-block binding subunit of TFIIIC (InterPro:IPR007309); BEST Arabidopsis thaliana protein match is: transcription factor-related (TAIR:AT1G59453.1); Has 39 Blast hits to 33 proteins in 8 species: Archae - 0; Bacteria - 3; Metazoa - 0; Fungi - 0; Plants - 32; Viruses - 0; Other Eukaryotes - 4 (source: NCBI BLink).	1731	GNGANQIHRSSVSVSRSRLNR
AT1G17450.1		FUNCTIONS IN: molecular_function unknown; CONTAINS InterPro DOMAIN/s: B-block binding subunit of TFIIIC (InterPro:IPR007309); BEST Arabidopsis thaliana protein match is: transcription factor-related (TAIR:AT1G59453.1); Has 39 Blast hits to 33 proteins in 8 species: Archae - 0; Bacteria - 3; Metazoa - 0; Fungi - 0; Plants - 32; Viruses - 0; Other Eukaryotes - 4 (source: NCBI BLink).	258	GYLGSHSRHRAWRSVCRRLTDSHV
AT1G17460.1	TRFL3	TRFL3 (TRF-LIKE 3); DNA binding / transcription factor	580	QSPISRVVSKARVVKRSRSRNGF
AT1G17480.1	IQD7	IQD7 (IQ-domain 7); calmodulin binding	37	RISSESLASSSFKSRGS
AT1G17500.1		ATPase, coupled to transmembrane movement of ions, phosphorylative mechanism	280	DTKVMQNSTKSPSKRSRIEKTMDYII
AT1G17545.1		protein phosphatase 2C-related / PP2C-related	106	GIYDGHRRSRPVSGSVSSDDRMVL
AT1G17580.1	MYA1, ATMYA1, XI-1	MYA1 (MYOSIN 1); motor/ protein binding	1202	SSLFGRVSQSFRGSPQSAG
AT1G17580.1	MYA1, ATMYA1, XI-1	MYA1 (MYOSIN 1); motor/ protein binding	588	LHEDSSRSSKFSSIGSRFKQQ
AT1G17580.1	MYA1, ATMYA1, XI-1	MYA1 (MYOSIN 1); motor/ protein binding	787	QKNFRRYVDRKSFVTTRSS
AT1G17600.1		disease resistance protein (TIR-NBS-LRR class), putative	696	KRSTLKKLKLSYRGGRRSALRFFLRKSTRQQH
AT1G17640.1		RNA recognition motif (RRM)-containing protein	233	EPKRTGRDNSFRSYGASGK
AT1G17665.1		unknown protein	43	SRSRAALYSQKLLSESE
AT1G17680.1		transcription factor-related	117	EGFMEFMSSGRRRKSRKYKKKGRRPGSKKEV
AT1G17680.2		transcription factor-related	117	EGFMEFMSSGRRRKSRKYKKKGRRPGSKKEV
AT1G17720.1	ATB BETA	ATB BETA; nucleotide binding / protein phosphatase type 2A regulator	438	TPARPSRSIGSMTRVVRRGSESPGTE
AT1G17720.2	ATB BETA	ATB BETA; nucleotide binding / protein phosphatase type 2A regulator	437	TPARPSRSIGSMTRVVRRGSESPGTE
AT1G17744.1		unknown protein	18	TCHRSKQSNSMFGSSHRISRWS
AT1G17745.1	PGDH	PGDH (3-PHOSPHOGLYCERATE DEHYDROGENASE); phosphoglycerate dehydrogenase	10	KAVNSRWTSPSPSPSSRFAVL
AT1G17750.1		leucine-rich repeat transmembrane protein kinase, putative	563	SNSLNGSIPSSFRSWKSLS
AT1G17760.1	CSTF77, ATCSTF77	CSTF77; protein binding	655	PTRGVSQRLPRDRRATKRKDSDRQEEDDT
AT1G17790.1		DNA-binding bromodomain-containing protein	29	GVSRQERSVPLVSPSNSFA
AT1G17820.1		phosphoinositide binding	245	GSSSKVRLFLKKFSRKRSNREDRKTYSHHGSSSG
AT1G17820.1		phosphoinositide binding	296	FSRSVSHSSHISGVSHLS
AT1G17820.1		phosphoinositide binding	725	SSNKQETNSRGSSREVSAVQSPSRSVASSEEDDSRGKKQ
AT1G17830.1		unknown protein	124	SDDSEIEKLSRSMSSGSSKIWDSVSDD
AT1G17910.1		wall-associated kinase, putative	591	RAKVSDFGTSRSVSIDH
AT1G17980.1		nucleotidyltransferase family protein	485	VRPSHTSKGTWDSNRRSEHRNSSTSSAP
AT1G17980.1		nucleotidyltransferase family protein	522	SSESKAGSNSPVDGKKRKWG
AT1G17980.2		nucleotidyltransferase family protein	358	VRPSHTSKGTWDSNRRSEHRNSSTSSAP
AT1G17980.2		nucleotidyltransferase family protein	395	SSESKAGSNSPVDGKKRKWG
AT1G18000.1		FUNCTIONS IN: molecular_function unknown; INVOLVED IN: biological_process unknown; LOCATED IN: cellular_component unknown; CONTAINS InterPro DOMAIN/s: Protein of unknown function DUF895, eukaryotic (InterPro:IPR010291), Major facilitator superfamily, general substrate transporter (InterPro:IPR016196); BEST Arabidopsis thaliana protein match is: unknown protein (TAIR:AT1G18010.1); Has 489 Blast hi…	216	SVIRNDGSRCSAVKYSR
AT1G18010.1		FUNCTIONS IN: molecular_function unknown; INVOLVED IN: biological_process unknown; LOCATED IN: cellular_component unknown; CONTAINS InterPro DOMAIN/s: Protein of unknown function DUF895, eukaryotic (InterPro:IPR010291), Major facilitator superfamily, general substrate transporter (InterPro:IPR016196); BEST Arabidopsis thaliana protein match is: unknown protein (TAIR:AT1G18000.1); Has 489 Blast hi…	216	SVIRNDGSRCSAVKYSR
AT1G18050.1		SWAP (Suppressor-of-White-APricot)/surp domain-containing protein	107	SFRTRVRSFTTSLWLSRRGCY
AT1G18140.1	LAC1, ATLAC1	LAC1 (Laccase 1); laccase	309	TGKTKPENSVNTRRRRRLT
AT1G18160.1		protein kinase family protein	13	ITPNQRDDGEGSVSNRSNKSSDAEPSPSDSLRS
AT1G18160.1		protein kinase family protein	399	EHTESWSAEHRSRTKGSREENQSAGGG
AT1G18160.1		protein kinase family protein	456	HARSPSWTEGVSSPAGRRMK
AT1G18160.1		protein kinase family protein	682	GERISDRSIGNESSKSD
AT1G18180.1		oxidoreductase, acting on the CH-CH group of donors	286	QETTAWDRRNSKKSQRSI
AT1G18190.1	GC2	GC2 (golgin candidate 2)	162	SDGKKSSSSNVVNSRGR
AT1G18190.1	GC2	GC2 (golgin candidate 2)	241	PRETSPSVGKRDGRESRRSSVWGKQVRE
AT1G18190.1	GC2	GC2 (golgin candidate 2)	297	SDSSTDSERERQREERRRRRE
AT1G18190.1	GC2	GC2 (golgin candidate 2)	41	TSPKSGSSPVSLKDQLRKKTYEGSDSGSGSQRNS
AT1G18335.1		GCN5-related N-acetyltransferase (GNAT) family protein	51	SIDDPLSPFDSFRRYRRNDLSLYLESGRGDRL
AT1G18370.1	HIK, ATNACK1, NACK1	HIK (HINKEL); ATP binding / microtubule motor	10	SKMDRTPAVTPGGSSRSREEK
AT1G18370.1	HIK, ATNACK1, NACK1	HIK (HINKEL); ATP binding / microtubule motor	692	ESGDVSSREGTPGYRRSSSVNMK
AT1G18390.1		ATP binding / kinase/ protein kinase/ protein serine/threonine kinase/ protein tyrosine kinase	278	FWYVYHRRKTKSYRNSSALLPRN
AT1G18390.2		ATP binding / kinase/ protein kinase/ protein serine/threonine kinase/ protein tyrosine kinase	284	FWYVYHRRKTKSYRNSSALLPRN
AT1G18410.1		kinesin motor protein-related	1073	SDKPKPVTPRSNTTTSR
AT1G18410.1		kinesin motor protein-related	1120	KKTGSASNFLKSPKDSKRW
AT1G18410.1		kinesin motor protein-related	159	SSPGSSHGGSTPRSPFSPSSPRERHNKGLADSRFQR
AT1G18410.1		kinesin motor protein-related	547	KNRSWSQKELSYRSFIS
AT1G18410.1		kinesin motor protein-related	816	RVVSSTALNERSSRSHSIVTVHVRGKD
AT1G18420.1		CONTAINS InterPro DOMAIN/s: Uncharacterised protein family UPF0005 (InterPro:IPR006214); BEST Arabidopsis thaliana protein match is: AtALMT9 (aluminum-activated malate transporter 9); anion channel (TAIR:AT3G18440.1); Has 336 Blast hits to 334 proteins in 83 species: Archae - 0; Bacteria - 112; Metazoa - 1; Fungi - 9; Plants - 203; Viruses - 0; Other Eukaryotes - 11 (source: NCBI BLink).	3	PKLESFRRGSMFDGSFRRGSMFDGSFRQSMRDRLILQSRGYSN
AT1G18450.1	ATARP4, ARP4	ATARP4; structural constituent of cytoskeleton	55	NSNSEDSKTESEKEKSKRKLYVGSQAMSYRRD
AT1G18470.1		zinc finger (C3HC4-type RING finger) family protein	206	HRSSRARETGSSSTSIR
AT1G18470.2		zinc finger (C3HC4-type RING finger) family protein	206	HRSSRARETGSSSTSIR
AT1G18485.1		pentatricopeptide (PPR) repeat-containing protein	12	VLFDYRRSRKESSFPRAVYNSNS
AT1G18500.1	MAML-4, IPMS1	MAML-4 (METHYLTHIOALKYLMALATE SYNTHASE-LIKE 4); 2-isopropylmalate synthase	33	SSSFRFQPSHHRSISLRSQTLRLSCSIS
AT1G18550.1		ATP binding / microtubule motor	685	TVANTSPALDRRKTRSHGLVHQ
AT1G18560.1		DNA binding / protein dimerization	34	GLGSSDKSNSVPPKRKKTMTSVY
AT1G18620.1		unknown protein	213	DMKDTSRYYVDSRGKSKSGKKLK
AT1G18620.1		unknown protein	247	HVDLKSGNKLSESFSRSSSMNKVSGSPKRPPSVV
AT1G18620.1		unknown protein	304	DNSDPFARSLRENSLNRSLRFSPSSPRSLGKDPA
AT1G18620.1		unknown protein	370	TERNRFSQKQACRSVKSLS
AT1G18620.1		unknown protein	505	VNVRRSSTSRKAVKDRSPGNQRA
AT1G18620.1		unknown protein	566	MKPEHDKRSRPPASPSDSSKLRKQISRQPVESTTSPGGRRSRPRDQRSLQQNDGQ
AT1G18620.2		unknown protein	249	DMKDTSRYYVDSRGKSKSGKKLK
AT1G18620.2		unknown protein	283	HVDLKSGNKLSESFSRSSSMNKVSGSPKRPPSVV
AT1G18620.2		unknown protein	340	DNSDPFARSLRENSLNRSLRFSPSSPRSLGKDPA
AT1G18620.2		unknown protein	406	TERNRFSQKQACRSVKSLS
AT1G18620.2		unknown protein	541	VNVRRSSTSRKAVKDRSPGNQRA
AT1G18620.2		unknown protein	602	MKPEHDKRSRPPASPSDSSKLRKQISRQPVESTTSPGGRRSRPRDQRSLQQNDGQ
AT1G18670.1	IBS1	IBS1 (IMPAIRED IN BABA-INDUCED STERILITY 1); ATP binding / kinase/ protein kinase/ protein serine/threonine kinase/ protein tyrosine kinase	446	TTRKKISGNGRRGTESRKPTRKPPAFA
AT1G18670.1	IBS1	IBS1 (IMPAIRED IN BABA-INDUCED STERILITY 1); ATP binding / kinase/ protein kinase/ protein serine/threonine kinase/ protein tyrosine kinase	47	SWWSKSGKKSSSKKSGSELGS
AT1G18670.1	IBS1	IBS1 (IMPAIRED IN BABA-INDUCED STERILITY 1); ATP binding / kinase/ protein kinase/ protein serine/threonine kinase/ protein tyrosine kinase	73	SESGRASSNCRSESVSFRLGNLSK
AT1G18680.1		HNH endonuclease domain-containing protein	17	VPPPSPPSSPSRSNVKSNGEERPRF
AT1G18740.1		unknown protein	169	DEKDHPSGTNLAHRNRSFGRVKDSHHRSIGHFRSLSWSVSRSWSASKQL
AT1G18740.1		unknown protein	7	GSFGRSLLSLRRDQVDSS
AT1G18740.1		unknown protein	90	NHRSQISKSPMDRLISDY
AT1G18790.1		RWP-RK domain-containing protein	233	NHKRKRRSGMSTPITSSS
AT1G18810.1		phytochrome kinase substrate-related	100	LTKTTSSRSKTSRHGTPSVRSESSCNSQ
AT1G18810.1		phytochrome kinase substrate-related	165	TVHTDPKNSCKSRNSDRDFVAY
AT1G18840.1	IQD30	IQD30; calmodulin binding	530	ITSHSPKTRVSNSSGKSGNKT
AT1G18840.2	IQD30	IQD30; calmodulin binding	530	ITSHSPKTRVSNSSGKSGNKT
AT1G18860.1	WRKY61, ATWRKY61	WRKY61; transcription factor	328	LSMLNRFSSPPSNVSRSNSYPS
AT1G18870.1	ICS2	ICS2 (ISOCHORISMATE SYNTHASE 2); isochorismate synthase	130	SRRSDSGRPDLLQDFSS
AT1G18870.1	ICS2	ICS2 (ISOCHORISMATE SYNTHASE 2); isochorismate synthase	172	PFSHDDWRSIRRFLSSKSPLIRAY
AT1G18870.1	ICS2	ICS2 (ISOCHORISMATE SYNTHASE 2); isochorismate synthase	24	QSYSRTSFTKLSSRVSRQRFLRCTLSMNG
AT1G18870.2	ICS2	ICS2 (ISOCHORISMATE SYNTHASE 2); isochorismate synthase	122	PFSHDDWRSIRRFLSSKSPLIRAY
AT1G18870.2	ICS2	ICS2 (ISOCHORISMATE SYNTHASE 2); isochorismate synthase	80	SRRSDSGRPDLLQDFSS
AT1G18890.1	ATCDPK1, CPK10	ATCDPK1 (CALCIUM-DEPENDENT PROTEIN KINASE 1); calmodulin-dependent protein kinase/ kinase/ protein kinase	503	GTDWRKASRQYSRERFKSLSINLMK
AT1G18910.1		protein binding / zinc ion binding	954	TIRRISRDSSLDPQKKSYI
AT1G18950.1		aminoacyl-tRNA synthetase family	492	DEHRDESLDRRQDTVRRQRPQRYSAT
AT1G18950.1		aminoacyl-tRNA synthetase family	601	EPRRAKKMPRRETKLRSRSNDFRPGLRRSKRATRI
AT1G18990.1		unknown protein	205	PSPSPRVSFNQRTLDLSN
AT1G18990.1		unknown protein	264	LSDSAQNSPRWSVRSMKKSFVDQN
AT1G19000.1		myb family transcription factor	144	QKYFLRRTNLNRRRRRSSLFDIT
AT1G19000.2		myb family transcription factor	144	QKYFLRRTNLNRRRRRSSLFDIT
AT1G19010.1		unknown protein	250	GGSSSQDDDDDDESRSRRHKTGEKDNAYLDS
AT1G19010.2		unknown protein	221	GGSSSQDDDDDDESRSRRHKTGEKDNAYLDS
AT1G19060.1		unknown protein	121	PSHDSFNDRKRFYSVKESE
AT1G19090.1	RKF2	RKF2 (receptor-like serine/threonine kinase 2); kinase/ receptor signaling protein serine/threonine kinase	280	TSLGAFISYRRVSRKRKA
AT1G19100.1		ATP-binding region, ATPase-like domain-containing protein-related	16	KPERGTMLQSFSPRSHGSKGYSLPQDSE
AT1G19140.1		FUNCTIONS IN: molecular_function unknown; INVOLVED IN: ubiquinone biosynthetic process; LOCATED IN: mitochondrion; EXPRESSED IN: 24 plant structures; EXPRESSED DURING: 15 growth stages; CONTAINS InterPro DOMAIN/s: COQ9 (InterPro:IPR013718), Ubiquinone biosynthesis protein COQ9 (InterPro:IPR012762); Has 607 Blast hits to 607 proteins in 177 species: Archae - 0; Bacteria - 151; Metazoa - 114; Fungi…	115	GSRDVGVSPSIVGSFSRKE
AT1G19140.2		FUNCTIONS IN: molecular_function unknown; INVOLVED IN: ubiquinone biosynthetic process; LOCATED IN: mitochondrion; EXPRESSED IN: 24 plant structures; EXPRESSED DURING: 15 growth stages; CONTAINS InterPro DOMAIN/s: COQ9 (InterPro:IPR013718), Ubiquinone biosynthesis protein COQ9 (InterPro:IPR012762); Has 598 Blast hits to 598 proteins in 175 species: Archae - 0; Bacteria - 149; Metazoa - 114; Fungi…	115	GSRDVGVSPSIVGSFSRKE
AT1G19220.1	ARF19, IAA22, ARF11	ARF19 (AUXIN RESPONSE FACTOR 19); DNA binding / transcription factor	954	QRMRTYTKVQKRGSVGRSIDVTRYSGYD
AT1G19230.1		respiratory burst oxidase protein E (RbohE) / NADPH oxidase	42	DLSRNSGESGSGSSWER
AT1G19290.1		LOCATED IN: mitochondrion; EXPRESSED IN: 12 plant structures; EXPRESSED DURING: 6 growth stages; CONTAINS InterPro DOMAIN/s: Pentatricopeptide repeat (InterPro:IPR002885); BEST Arabidopsis thaliana protein match is: pentatricopeptide (PPR) repeat-containing protein (TAIR:AT5G55840.1); Has 31003 Blast hits to 6161 proteins in 194 species: Archae - 6; Bacteria - 22; Metazoa - 935; Fungi - 736; Plan…	16	FLYTRSFSEASRTLRRELRGG
AT1G19310.1		zinc finger (C3HC4-type RING finger) family protein	72	VPLYGRGKSSADPRSKSIPGL
AT1G19330.1		unknown protein	119	SEDTLKPHKSKLRGQRSSRSSHKTMSRSLSSDSQSKSSGFTP
AT1G19330.2		unknown protein	113	TSEDTLKPHKSKLRGQRSSRSSHKTMSRSLSSDSQSKSSGFTP
AT1G19340.1		methyltransferase MT-A70 family protein	32	NRSYTRFKVSPSAYYSRF
AT1G19370.1		unknown protein	532	DDLMDLRRRYAGGSYRSVGANDPS
AT1G19394.1		unknown protein	14	KSSSDRLSRLDMEGKKT
AT1G19400.1		unknown protein	16	SRYHNYNQHSSRSSSPW
AT1G19400.2		unknown protein	16	SRYHNYNQHSSRSSSPW
AT1G19430.1		dehydration-responsive protein-related	65	SSRTKSAHEVSESSKLHERGKVESGSKSKEG
AT1G19440.1	KCS4	KCS4 (3-KETOACYL-COA SYNTHASE 4); acyltransferase/ catalytic/ transferase, transferring acyl groups other than amino-acyl groups	297	RVGGSAVLLSNKSRDKRRSKYRLVHVVRTHRGAD
AT1G19450.1		integral membrane protein, putative / sugar transporter family protein	255	NEIKRSVASSSKRSAVRFVD
AT1G19485.1		AT hook motif-containing protein	300	PVRRKRQKTKSTEESCTPM
AT1G19485.1		AT hook motif-containing protein	675	RSLLNESPSRYASNVSD
AT1G19490.1		bZIP transcription factor family protein	133	STLIRCSRSNGCGRSRQ
AT1G19490.1		bZIP transcription factor family protein	55	SWGSKGKRVRKRVKTESPPSDSLLKP
AT1G19530.1		unknown protein	0	MGSLMSGWDSRVRDPKSVRRCKSLTREEIDT
AT1G19620.1		unknown protein	114	QEVVEMSSKSYRRTSRSEKKMTERMV
AT1G19620.1		unknown protein	141	YRKTETERVTKTGSWRS
AT1G19630.1	CYP722A1	CYP722A1; electron carrier/ heme binding / iron ion binding / monooxygenase/ oxygen binding	62	EFVRSRRIRYGSCFRTSLFG
AT1G19650.1		SEC14 cytosolic factor, putative / phosphoglyceride transfer protein, putative	39	ILKKKSSKSKFRHSLKRRGSRSIDRTLSLTFED
AT1G19650.1		SEC14 cytosolic factor, putative / phosphoglyceride transfer protein, putative	506	ARESRPPSPPRSTITERV
AT1G19650.2		SEC14 cytosolic factor, putative / phosphoglyceride transfer protein, putative	434	ARESRPPSPPRSTITERV
AT1G19680.1		protein binding / zinc ion binding	102	SLAIRSPSDVSLASPVR
AT1G19680.1		protein binding / zinc ion binding	150	AHTHSLPPRSTPSRRARGSPGQQLFRQVSD
AT1G19680.1		protein binding / zinc ion binding	244	EHLGSGRRRLSGCSSSRFSCSPSV
AT1G19680.1		protein binding / zinc ion binding	407	KWSKARDSTSKKSFWSRHSNKRLSHSFSSVEG
AT1G19715.1		jacalin lectin family protein	519	DRYNVVKSLSFYTSRGR
AT1G19715.2		jacalin lectin family protein	495	DRYNVVKSLSFYTSRGR
AT1G19740.1		ATP-dependent protease La (LON) domain-containing protein	30	ATYRSINRRSCKLLSFRCSSSSFS
AT1G19750.1		transducin family protein / WD-40 repeat family protein	279	KGSSSEKPSVEKSRQKRI
AT1G19750.1		transducin family protein / WD-40 repeat family protein	4	FKDRETGRFRSNSFANRFKSRRILSLQLSNRKDFVSPHRGSVNSLQV
AT1G19780.1	ATCNGC8, CNGC8	ATCNGC8 (CYCLIC NUCLEOTIDE GATED CHANNEL 8); calmodulin binding / cyclic nucleotide binding / ion channel	45	SRGGGKTKNTSKSFREG
AT1G19835.1		unknown protein	309	GDHRQDHRQRRSPVRPSSPLMSPMSHM
AT1G19835.1		unknown protein	940	TMKSPVASKHRHTKSNSSS
AT1G19840.1		auxin-responsive family protein	97	EEAIRFISRSDSSRSSRFTCPDDLQ
AT1G19860.1		zinc finger (CCCH-type) family protein	232	NRGSAGSVSSNTSSLYSS
AT1G19870.1	iqd32	iqd32 (IQ-domain 32); calmodulin binding	273	RARHSTKDGSRVSATSDKS
AT1G19870.1	iqd32	iqd32 (IQ-domain 32); calmodulin binding	64	SRTRETLESALLKSPSP
AT1G19870.1	iqd32	iqd32 (IQ-domain 32); calmodulin binding	651	SSSVKARKGKSEKSGSSQKRKVSKKITSSPK
AT1G19880.1		regulator of chromosome condensation (RCC1) family protein	447	KRGASKKRKASKASSDS
AT1G19960.1		FUNCTIONS IN: molecular_function unknown; INVOLVED IN: biological_process unknown; LOCATED IN: cellular_component unknown; EXPRESSED IN: 21 plant structures; EXPRESSED DURING: 13 growth stages; BEST Arabidopsis thaliana protein match is: transmembrane receptor (TAIR:AT2G32140.1); Has 41 Blast hits to 41 proteins in 16 species: Archae - 0; Bacteria - 2; Metazoa - 25; Fungi - 0; Plants - 9; Viruses…	27	GSGSGSGGSFGNQPRRSKVRKQ
AT1G19980.1		cytomatrix protein-related	294	STTNEKVSKSSKRKRAKNMTPVSVSEV
AT1G19990.1		unknown protein	177	SSPVKSAASTPRSNSKSVTVKKKEVQKS
AT1G19990.1		unknown protein	218	SKPTTKKRKKNSDDDDS
AT1G20000.1	TAF11b	TAF11b (TBP-ASSOCIATED FACTOR 11b); DNA binding / RNA polymerase II transcription factor/ transcription initiation factor	108	EQMSRYESFRRSGFKKSDMEKL
AT1G20050.1	HYD1	HYD1 (HYDRA1); C-8 sterol isomerase	93	VWKEYSKGDSRYVGRDSAVVSV
AT1G20060.1		ATP binding / microtubule motor	230	KKNDESCSGSLRSFNLS
AT1G20070.1		unknown protein	12	QVSGLRPFKNPKRRSSRGSLSRSGGSLALPLN
AT1G20100.1		unknown protein	186	IISESKKRKKHKPSKESRYNSLFD
AT1G20100.1		unknown protein	88	QVGYLSDGSQNSKKRRRETSPAVV
AT1G20100.2		unknown protein	88	QVGYLSDGSQNSKKRRRETSPAVV
AT1G20110.1		zinc finger (FYVE type) family protein	206	QSGYDGYNRSRSDLGSDLYGKRSDSGE
AT1G20110.1		zinc finger (FYVE type) family protein	273	YGRSISFSSSGRDSSVSSN
AT1G20130.1		hydrolase, acting on ester bonds / lipase/ structural constituent of cell wall	1	KRSSLVDSCSYSRIFRS
AT1G20150.1		subtilase family protein	560	ARLKSRYPSWSPAAIRSA
AT1G20150.1		subtilase family protein	672	SISISNFNGKESRRVSR
AT1G20180.1		unknown protein	16	TRKGKSDKECCRSLTSKL
AT1G20180.2		unknown protein	16	TRKGKSDKECCRSLTSKL
AT1G20190.1	ATEXPA11, EXP11, ATEXP11, ATHEXP ALPHA 1.14	ATEXPA11 (ARABIDOPSIS THALIANA EXPANSIN 11)	184	KSVSIKGSKTGWLAMSR
AT1G20225.1		FUNCTIONS IN: molecular_function unknown; INVOLVED IN: biological_process unknown; LOCATED IN: vacuole; CONTAINS InterPro DOMAIN/s: Thioredoxin-like fold (InterPro:IPR012336); BEST Arabidopsis thaliana protein match is: unknown protein (TAIR:AT1G76020.1); Has 156 Blast hits to 152 proteins in 51 species: Archae - 0; Bacteria - 81; Metazoa - 14; Fungi - 6; Plants - 28; Viruses - 0; Other Eukaryote…	148	NSYHSPLKSGFSNSKSDLATRVSFKYSVSRGVS
AT1G20270.1		oxidoreductase, 2OG-Fe(II) oxygenase family protein	118	GKSKDSRVRTSSGTFLRRGRDKI
AT1G20300.1		pentatricopeptide (PPR) repeat-containing protein	2	LLRSKLHLSRTLSFISPLL
AT1G20310.1		unknown protein	117	EDNGSFSKLKRIFSMRSYPSRKSNSTA
AT1G20320.1		NLI interacting factor (NIF) family protein	218	RDYSHDKESKSYAEEKRDESRNQGS
AT1G20400.1		myosin heavy chain-related	138	LGFLRIRKLKRSLSDHRRSRTPDGSSERSGADRFRA
AT1G20400.1		myosin heavy chain-related	187	SSGSSSRTSVVAELRRR
AT1G20400.1		myosin heavy chain-related	520	VGSYSSRYKRQKTSALKES
AT1G20400.1		myosin heavy chain-related	568	RGHQGRSVVNPGSSVDRSKETR
AT1G20410.1		unknown protein	19	VSHGNSKTRRVYETARSLH
AT1G20440.1	COR47, RD17	COR47 (COLD-REGULATED 47)	94	ENKPSVIEKLHRSNSSSS
AT1G20450.2	LTI29, LTI45, ERD10	ERD10 (EARLY RESPONSIVE TO DEHYDRATION 10); actin binding	95	SLLDKLHRSNSSSSSVSKKGE
AT1G20510.1	OPCL1	OPCL1 (OPC-8:0 COA LIGASE1); 4-coumarate-CoA ligase	357	SRRYGTAGKLSASMEGR
AT1G20510.2	OPCL1	OPCL1 (OPC-8:0 COA LIGASE1); 4-coumarate-CoA ligase	357	SRRYGTAGKLSASMEGR
AT1G20530.1		unknown protein	116	SKPESLNLNHDSFYSRRYES
AT1G20530.1		unknown protein	14	SLCRDRCSSLEDTLRRS
AT1G20530.1		unknown protein	206	KKTLRISEKNRKRAPKESKDQKVSSDL
AT1G20650.1		ATP binding / protein kinase/ protein serine/threonine kinase	356	QSRSHEARNVSSPSPEISRTPRRD
AT1G20670.1		DNA-binding bromodomain-containing protein	54	NNNRSGSKNPNSLNHRSKRRNPNSNDGDSPWIK
AT1G20693.1	HMGB2, HMG BETA 1, NFD2, NFD02	HMGB2 (HIGH MOBILITY GROUP B 2); DNA binding / chromatin binding / structural constituent of chromatin / transcription factor	4	KSKTETRSSKLSVTKKP
AT1G20693.2	HMGB2, HMG BETA 1, NFD2, NFD02	HMGB2 (HIGH MOBILITY GROUP B 2); DNA binding / chromatin binding / structural constituent of chromatin / transcription factor	4	KSKTETRSSKLSVTKKP
AT1G20693.3	HMGB2, HMG BETA 1, NFD2, NFD02	HMGB2 (HIGH MOBILITY GROUP B 2); DNA binding / chromatin binding / structural constituent of chromatin / transcription factor	4	KSKTETRSSKLSVTKKP
AT1G20710.1	WOX10	WOX10 (WUSCHEL related homeobox 10); DNA binding / transcription factor	130	RRARSKRKQPPTTTITS
AT1G20720.1		ATP binding / ATP-dependent DNA helicase/ ATP-dependent helicase/ DNA binding / hydrolase, acting on acid anhydrides, in phosphorus-containing anhydrides / nucleic acid binding	1155	RTTKSKLRLPKRNLPTS
AT1G20750.1		helicase-related	4	RSKSDSKEEVKQTLNSK
AT1G20750.1		helicase-related	88	KSYKSRFPNGNLSHSKT
AT1G20750.1		helicase-related	898	RRSPLGAESSVTPERYS
AT1G20760.1		calcium-binding EF hand family protein	1001	KVSSDESPTKRSDNWNS
AT1G20760.1		calcium-binding EF hand family protein	51	SDRSHSGFLDRQNFYNS
AT1G20760.1		calcium-binding EF hand family protein	761	SEYGTTHSEDRSPRDSPVSRNATEVPSP
AT1G20760.1		calcium-binding EF hand family protein	840	NTARADSPSSRSFGAQRKSQF
AT1G20795.1		F-box family protein	110	TKRYRFLNYSKSMFLSRVDRW
AT1G20795.1		F-box family protein	29	RRSFNSHISEDPYFKSK
AT1G20810.1		immunophilin / FKBP-type peptidyl-prolyl cis-trans isomerase family protein	63	LTPSSSEARERRSRKVIP
AT1G20830.1		unknown protein	83	SDIPHDSEYSISRFRSM
AT1G20840.1	TMT1	TMT1 (TONOPLAST MONOSACCHARIDE TRANSPORTER1); carbohydrate transmembrane transporter/ nucleoside transmembrane transporter/ sugar:hydrogen symporter	275	NSSLGLRSRHGSLANQSM
AT1G20840.1	TMT1	TMT1 (TONOPLAST MONOSACCHARIDE TRANSPORTER1); carbohydrate transmembrane transporter/ nucleoside transmembrane transporter/ sugar:hydrogen symporter	433	YKRYYLKEDGAESRRGS
AT1G20840.1	TMT1	TMT1 (TONOPLAST MONOSACCHARIDE TRANSPORTER1); carbohydrate transmembrane transporter/ nucleoside transmembrane transporter/ sugar:hydrogen symporter	467	SALVSRSVLGPKSVHGS
AT1G20870.1		LOCATED IN: cellular_component unknown; EXPRESSED IN: 15 plant structures; EXPRESSED DURING: 7 growth stages; CONTAINS InterPro DOMAIN/s: HSP20-like chaperone (InterPro:IPR008978); BEST Arabidopsis thaliana protein match is: unknown protein (TAIR:AT1G54850.1); Has 48 Blast hits to 39 proteins in 11 species: Archae - 0; Bacteria - 0; Metazoa - 1; Fungi - 0; Plants - 42; Viruses - 0; Other Eukaryot…	283	SGTSKTPERFRETYKRRRFKNSSKKAT
AT1G20880.1		RNA recognition motif (RRM)-containing protein	123	SPYVGSVQSPRGLHFGS
AT1G20900.1	ESC, ORE7, AHL27	ESC (ESCAROLA); double-stranded DNA binding	126	VESVSTYARRRGRGVSVLG
AT1G20910.1		ARID/BRIGHT DNA-binding domain-containing protein	216	KEPSSHQGSGSGRARRDSAARAMQ
AT1G20920.1		DEAD box RNA helicase, putative	223	EGGERKEKEREKSVGRSSRHEDSPKRKSVEDNGEK
AT1G20970.1		FUNCTIONS IN: molecular_function unknown; INVOLVED IN: biological_process unknown; LOCATED IN: plasma membrane, vacuole; EXPRESSED IN: guard cell, cultured cell; BEST Arabidopsis thaliana protein match is: PPI1 (PROTON PUMP INTERACTOR 1); protein binding (TAIR:AT4G27500.1); Has 53409 Blast hits to 33585 proteins in 1572 species: Archae - 464; Bacteria - 7066; Metazoa - 25076; Fungi - 5173; Plants…	1057	KSNTRSTFRRLGTLDGRS
AT1G20970.1		FUNCTIONS IN: molecular_function unknown; INVOLVED IN: biological_process unknown; LOCATED IN: plasma membrane, vacuole; EXPRESSED IN: guard cell, cultured cell; BEST Arabidopsis thaliana protein match is: PPI1 (PROTON PUMP INTERACTOR 1); protein binding (TAIR:AT4G27500.1); Has 53409 Blast hits to 33585 proteins in 1572 species: Archae - 464; Bacteria - 7066; Metazoa - 25076; Fungi - 5173; Plants…	1300	KSHKPSSQFLKQNKSKS
AT1G20980.1	SPL14, FBR6, SPL1R2, ATSPL14	SPL14 (squamosa promoter binding protein-like 14); DNA binding / transcription activator/ transcription factor	363	ERSSSSNQSPSQDSDSRGQDTRSSLSL
AT1G20980.1	SPL14, FBR6, SPL1R2, ATSPL14	SPL14 (squamosa promoter binding protein-like 14); DNA binding / transcription activator/ transcription factor	438	ASPETMRSKNHKNSSPRT
AT1G21000.1		zinc-binding family protein	221	SPGTPPIYNHRNSSRRK
AT1G21000.2		zinc-binding family protein	218	SPGTPPIYNHRNSSRRK
AT1G21010.1		unknown protein	167	KASSGINRSGSVRNLRRYTSKRAKLAVRSFRLKLST
AT1G21050.1		unknown protein	133	VLRIALECDRRRSSNSRSSSIFDVPV
AT1G21050.1		unknown protein	23	PTSVDCSREFRHRRTLRSLIECM
AT1G21060.1		unknown protein	471	KKKSRNIEYSPENSSFRYV
AT1G21080.1		DNAJ heat shock N-terminal domain-containing protein	335	EHDHSSTSPKSDEASRS
AT1G21080.2		DNAJ heat shock N-terminal domain-containing protein	248	EHDHSSTSPKSDEASRS
AT1G21130.1		O-methyltransferase, putative	58	SRSDSFLSPSEIASKLP
AT1G21130.2		O-methyltransferase, putative	58	SRSDSFLSPSEIASKLP
AT1G21160.1		GTP binding / GTPase/ translation initiation factor	564	IDTPGHESFTNLRSRGSNL
AT1G21170.1	SEC5B	SEC5B	1057	KAAYSRTSTDSPSRNYRESQPMGSPVQ
AT1G21170.1	SEC5B	SEC5B	678	RNRSPYSISYLPLAFRS
AT1G21327.1		unknown protein	26	AAEGEQRGRSKKVTRKSSSIHSIKS
AT1G21350.2		antioxidant/ oxidoreductase	18	PSRTALAVSSRRFSSFSPSRLDFSNLRRRVNAP
AT1G21350.3		antioxidant/ oxidoreductase	18	PSRTALAVSSRRFSSFSPSRLDFSNLRRRVNAP
AT1G21370.1		unknown protein	21	DLESGGTIRKSRKPKTSFSKMIKSLGNR
AT1G21370.2		unknown protein	21	DLESGGTIRKSRKPKTSFSKMIKSLGNR
AT1G21390.1	emb2170	emb2170 (embryo defective 2170)	196	STKRSGSSSSNNSIRSRSSLRDEKSSCFSFLT
AT1G21390.1	emb2170	emb2170 (embryo defective 2170)	30	SPTLWRTSPPKSPPPFHRP
AT1G21450.1	SCL1	SCL1 (SCARECROW-LIKE 1); transcription factor	197	SPKESSSADSNSHVSSK
AT1G21500.1		unknown protein	8	LSPAAHAARLSSPSPRSL
AT1G21510.1		unknown protein	145	KPRYPSRFDSPVIPSRNSTTPNRANEDSKRGSNCSKRTRELSPNHRSLTRQKSFRQDQERVV
AT1G21510.1		unknown protein	211	SNSLTKGKYLKSPSPSRRYEGNFLKSPSPSRRFGVAAASLT
AT1G21510.1		unknown protein	98	SLSTASSVSVSKERSFSNDFLRA
AT1G21528.1		unknown protein	35	KSMIMKTLFSSRSPLKSK
AT1G21560.1		unknown protein	133	VYRSYLKRLVENSKSSRTN
AT1G21570.1		zinc finger (CCCH-type) family protein	145	ARERVFRFGSLRYKMDSSRRTLQRISDV
AT1G21570.1		zinc finger (CCCH-type) family protein	55	RNGSSLNISRKLSMMRKRHTIYTRS
AT1G21570.1		zinc finger (CCCH-type) family protein	86	RKSKVLSVGGSHLKWSKSIERDSRKAN
AT1G21580.1		hydroxyproline-rich glycoprotein family protein	1106	SLFLCDSLSSSRRRIRSEVHVSA
AT1G21580.1		hydroxyproline-rich glycoprotein family protein	1158	DSLSSSPRLSRPLRSEIH
AT1G21580.1		hydroxyproline-rich glycoprotein family protein	1217	CNSLSNSQRLSFRQLRSEI
AT1G21580.1		hydroxyproline-rich glycoprotein family protein	1361	VSVPHRDPQSKTSMNSK
AT1G21580.1		hydroxyproline-rich glycoprotein family protein	1416	TKRHTWHRKSDASPSSFV
AT1G21580.1		hydroxyproline-rich glycoprotein family protein	1458	SYVRKGNSLLRKPSHGSPGA
AT1G21580.1		hydroxyproline-rich glycoprotein family protein	1644	GYFKRSKNQLVRNSESRCNQS
AT1G21580.1		hydroxyproline-rich glycoprotein family protein	175	YSRNSSGVNRGLDGSSRSRDEFRSLGYARKESG
AT1G21580.1		hydroxyproline-rich glycoprotein family protein	246	GSDRYGLTVSRDVTRSSASREGARE
AT1G21580.1		hydroxyproline-rich glycoprotein family protein	317	KSALLRLETPRSYKNSRENEWSRQHNH
AT1G21580.1		hydroxyproline-rich glycoprotein family protein	440	HLSDEISVSEGFRRSTR
AT1G21590.1		protein kinase family protein	162	HHSKGKSDARRNTLSSF
AT1G21610.1		wound-responsive family protein	240	KHSDRANHQSRNDTSHKSRETGSSSA
AT1G21610.2		wound-responsive family protein	240	KHSDRANHQSRNDTSHKSRETGSSSA
AT1G21630.1		calcium-binding EF hand family protein	858	RKGIEADSSPRTKDTRS
AT1G21640.1	NADK2, ATNADK2	NADK2; NAD+ kinase/ calmodulin binding	158	NKGRKEILSGRSSSMNS
AT1G21640.1	NADK2, ATNADK2	NADK2; NAD+ kinase/ calmodulin binding	427	DSRSASSQSKESGRFEGD
AT1G21640.1	NADK2, ATNADK2	NADK2; NAD+ kinase/ calmodulin binding	578	PPSDNLSRAVGSHSVRESQTQRNNSGS
AT1G21650.1		ATP binding / protein binding	626	YVGKSESKSWTRKKAKSVVTESL
AT1G21660.1		heat shock protein binding	308	DLDSFFSARSSSVPKSRTTTETTRK
AT1G21670.1		INVOLVED IN: proteolysis; LOCATED IN: cell wall, plant-type cell wall; EXPRESSED IN: 23 plant structures; EXPRESSED DURING: 14 growth stages; CONTAINS InterPro DOMAIN/s: WD40-like Beta Propeller (InterPro:IPR011659), Peptidase S9B, dipeptidylpeptidase IV N-terminal (InterPro:IPR002469), Six-bladed beta-propeller, TolB-like (InterPro:IPR011042); BEST Arabidopsis thaliana protein match is: unknown …	346	SPKSHHFNPFLSPDSSR
AT1G21680.1		FUNCTIONS IN: molecular_function unknown; INVOLVED IN: biological_process unknown; LOCATED IN: plasma membrane, vacuole, plant-type cell wall; EXPRESSED IN: 25 plant structures; EXPRESSED DURING: 13 growth stages; CONTAINS InterPro DOMAIN/s: WD40-like Beta Propeller (InterPro:IPR011659), Six-bladed beta-propeller, TolB-like (InterPro:IPR011042); BEST Arabidopsis thaliana protein match is: unknown…	373	SSRVGYHSCRGDANGRRSP
AT1G21695.1		hydroxyproline-rich glycoprotein family protein	166	DSSQGSPVSSRWSSPKSSFSSRRGSPLKRTDSDLSSYE
AT1G21695.1		hydroxyproline-rich glycoprotein family protein	56	NSPSPSSSSSFFSESRSRPVSPFAPPPSFKL
AT1G21695.1		hydroxyproline-rich glycoprotein family protein	99	SPTPYFRSSSPRAGGSL
AT1G21722.1		unknown protein	105	CSFFCYDLLHSKRRRRRRHNRYIEEDY
AT1G21730.1		kinesin-related protein (MKRP1)	2	ATRSQRSSTISPARPRRSPAT
AT1G21730.1		kinesin-related protein (MKRP1)	300	LAGSESSKTEITGQRRKEGS
AT1G21740.1		unknown protein	322	GGKSNSSSPDSREVREREG
AT1G21760.1	ATFBP7, FBP7	FBP7 (F-BOX PROTEIN 7)	119	QSKYDGSWRKMWLLRSRVRTDG
AT1G21810.1		FUNCTIONS IN: molecular_function unknown; INVOLVED IN: biological_process unknown; LOCATED IN: cellular_component unknown; EXPRESSED IN: 14 plant structures; EXPRESSED DURING: 6 growth stages; CONTAINS InterPro DOMAIN/s: Protein of unknown function DUF869, plant (InterPro:IPR008587); BEST Arabidopsis thaliana protein match is: myosin heavy chain-related (TAIR:AT1G77580.2); Has 62951 Blast hits to…	191	SHSDGGRERVEGSCSDS
AT1G21830.1		unknown protein	30	RLLVLASKQRSSRTKHSSSSP
AT1G21980.1	ATPIP5K1, ATPIPK1	ATPIP5K1 (PHOSPHATIDYLINOSITOL-4-PHOSPHATE 5-KINASE 1); 1-phosphatidylinositol-4-phosphate 5-kinase/ actin filament binding / actin monomer binding / phosphatidylinositol phosphate kinase	526	YRIQRRFDLKGSSHGRST
AT1G22000.1		F-box family protein	498	HATRDENAERSYSKRSL
AT1G22040.1		kelch repeat-containing F-box family protein	19	ECSSESRKRRKISSENDEEE
AT1G22040.1		kelch repeat-containing F-box family protein	59	PRICYSSVRLVSRRWRSAVSTSEVYSLRK
AT1G22060.1		LOCATED IN: vacuole; EXPRESSED IN: 23 plant structures; EXPRESSED DURING: 13 growth stages; BEST Arabidopsis thaliana protein match is: F-box family protein (TAIR:AT1G22000.1); Has 67094 Blast hits to 30189 proteins in 1408 species: Archae - 880; Bacteria - 6261; Metazoa - 35085; Fungi - 5326; Plants - 2622; Viruses - 293; Other Eukaryotes - 16627 (source: NCBI BLink).	1182	HRLTRYETSLRSLTRDS
AT1G22060.1		LOCATED IN: vacuole; EXPRESSED IN: 23 plant structures; EXPRESSED DURING: 13 growth stages; BEST Arabidopsis thaliana protein match is: F-box family protein (TAIR:AT1G22000.1); Has 67094 Blast hits to 30189 proteins in 1408 species: Archae - 880; Bacteria - 6261; Metazoa - 35085; Fungi - 5326; Plants - 2622; Viruses - 293; Other Eukaryotes - 16627 (source: NCBI BLink).	164	DHSSPDESSRCRISPSD
AT1G22080.1		unknown protein	196	DEPKRSKKRRRQRVARSSSKLHSNLDD
AT1G22080.2		unknown protein	196	DEPKRSKKRRRQRVARSSSKLHSNLDD
AT1G22160.1		senescence-associated protein-related	58	AMVSPRGTQRRHSSDYSEDFLRSCSL
AT1G22190.1		AP2 domain-containing transcription factor, putative	167	TTQKQVRSTKKSSSRKRSSTVAV
AT1G22190.1		AP2 domain-containing transcription factor, putative	51	GSDLHSFSHHLSPKPVS
AT1G22210.1		trehalose-6-phosphate phosphatase, putative	13	VDSLRDMSPTRVRSSFSDEHVSENDDERS
AT1G22230.1		unknown protein	26	SLPSKSISSPSSSFNRRQNAPHHRRSISKLSSS
AT1G22240.1	APUM8	APUM8 (Arabidopsis Pumilio 8); RNA binding / binding	43	SYNSSSRFCLRSPSDYSLSSY
AT1G22250.1		unknown protein	116	ISPSKKVRSGDIGLSRSPSWLA
AT1G22260.1	ZYP1a, ZYP1	ZYP1a	720	SNKNYSISKDSRLGGSKRSEHIRVRSDNDNVQDS
AT1G22260.1	ZYP1a, ZYP1	ZYP1a	9	KSLDKPRSLSGSANMYSFSNRKPPDSVSSGSFSNLKL
AT1G22280.1		protein phosphatase 2C, putative / PP2C, putative	16	QSSSRSGKGRSDEGMIKYG
AT1G22280.2		protein phosphatase 2C, putative / PP2C, putative	16	QSSSRSGKGRSDEGMIKYG
AT1G22310.1	MBD8	MBD8; methyl-CpG binding	126	GSSGISLDSNSVKRKRGRPPKNKEE
AT1G22310.1	MBD8	MBD8; methyl-CpG binding	51	SMSIRIRVKRKKTKERKSSKITKGTS
AT1G22310.2	MBD8	MBD8; methyl-CpG binding	225	GSSGISLDSNSVKRKRGRPPKNKEE
AT1G22310.2	MBD8	MBD8; methyl-CpG binding	65	LTPKIDRSVFNESAGSRKQT
AT1G22420.1		hydroxyproline-rich glycoprotein family protein	261	LSPSLMLSPVQRSPENSL
AT1G22440.1		alcohol dehydrogenase, putative	125	LSNTRRYGMTSRFKDSRGEDI
AT1G22460.1		unknown protein	405	EIYGGESRLADLRSRFSMLMSKEKLA
AT1G22470.1		unknown protein	4	FLISSRNRRSMRTTTESKPKNLTV
AT1G22500.1		zinc finger (C3HC4-type RING finger) family protein	308	RLDRRPFSITPPYHTRS
AT1G22530.1	PATL2	PATL2 (PATELLIN 2); transporter	534	TSPRTRSKMVLSGPSKSA
AT1G22590.1	AGL87	MADS-box family protein	10	TNESTKSVRVACRSLRSPSVRRLSELPVEK
AT1G22610.1		C2 domain-containing protein	268	RMRQSYYYRSSGDKTSS
AT1G22610.1		C2 domain-containing protein	431	HSDAHRVSHSNLSNTRSKVYFSPK
AT1G22610.1		C2 domain-containing protein	818	SLRRSKANFSRIMSLLSSV
AT1G22620.1	ATSAC1	ATSAC1 (suppressor of actin 1); phosphatidylinositol-4,5-bisphosphate 5-phosphatase	245	SIYGRDFSVTLVSRRSRHFAGTRYLKRGVNDR
AT1G22670.1		protease-associated zinc finger (C3HC4-type RING finger) family protein	344	RRQASPLQSSSQRSHLSMKSSHSLGYS
AT1G22680.1		unknown protein	129	GGESRKVLRKSRSIGLLNLYSSCRR
AT1G22680.1		unknown protein	1	DTSPRTRIVPTRRSNSVKF
AT1G22770.1	GI, FB	GI (GIGANTEA)	540	SSRELTRKARSSFTTRSATKNLA
AT1G22790.1		unknown protein	124	GSSKEAFKLSLRSSLKRPSVAESRSLED
AT1G22790.2		unknown protein	124	GSSKEAFKLSLRSSLKRPSVAESRSLED
AT1G22830.1		pentatricopeptide (PPR) repeat-containing protein	157	SYIRNKRFQESVSVYKR
AT1G22830.2		pentatricopeptide (PPR) repeat-containing protein	157	SYIRNKRFQESVSVYKR
AT1G22870.1		protein kinase family protein	337	TGSSFFRSDTRLRALRFLDH
AT1G22870.1		protein kinase family protein	872	APPPSIAVGRGRGRGRSGTSISKPNGSKQQ
AT1G22880.1	ATGH9B4, ATCEL5, CEL5	CEL5 (CELLULASE 5); catalytic/ hydrolase, hydrolyzing O-glycosyl compounds	397	PKRIHHRGSSLPSRAVRSNSLGC
AT1G22880.2	ATGH9B4, ATCEL5, CEL5	CEL5 (CELLULASE 5); catalytic/ hydrolase, hydrolyzing O-glycosyl compounds	313	PKRIHHRGSSLPSRAVRSNSLGC
AT1G22882.1		FUNCTIONS IN: molecular_function unknown; INVOLVED IN: biological_process unknown; LOCATED IN: mitochondrion; CONTAINS InterPro DOMAIN/s: Sad1/UNC-like, C-terminal (InterPro:IPR012919), Galactose-binding like (InterPro:IPR008979); BEST Arabidopsis thaliana protein match is: unknown protein (TAIR:AT1G71360.1); Has 1862 Blast hits to 1619 proteins in 245 species: Archae - 32; Bacteria - 119; Metazo…	0	MQRSCRTRRRVSVNKFNGRNSFYK
AT1G22882.1		FUNCTIONS IN: molecular_function unknown; INVOLVED IN: biological_process unknown; LOCATED IN: mitochondrion; CONTAINS InterPro DOMAIN/s: Sad1/UNC-like, C-terminal (InterPro:IPR012919), Galactose-binding like (InterPro:IPR008979); BEST Arabidopsis thaliana protein match is: unknown protein (TAIR:AT1G71360.1); Has 1862 Blast hits to 1619 proteins in 245 species: Archae - 32; Bacteria - 119; Metazo…	227	LGLDEFKSRASNSRNKSLSDQVSGV
AT1G22930.1		T-complex protein 11	369	KRVATPRRKATPSTLRSRKGKKVSSVRNVAGT
AT1G22930.1		T-complex protein 11	599	SSPVQSVSSSSSRSKDSIGVEGSNRVNRS
AT1G22930.1		T-complex protein 11	63	QFYHNVSRKARAKPRSPSRSSDEELGQRIEA
AT1G22930.2		T-complex protein 11	258	KRVATPRRKATPSTLRSRKGKKVSSVRNVAGT
AT1G22930.2		T-complex protein 11	488	SSPVQSVSSSSSRSKDSIGVEGSNRVNRS
AT1G22985.1		AP2 domain-containing transcription factor, putative	15	DSSSSEDESPPSSRRRGKKLVKEI
AT1G23030.1		armadillo/beta-catenin repeat family protein / U-box domain-containing protein	139	LRRAMQRYGSLNSNKFSS
AT1G23030.1		armadillo/beta-catenin repeat family protein / U-box domain-containing protein	336	VQRLSSRSTEDRRNAVSEIRSLSKRSTDNR
AT1G23060.1		unknown protein	21	SVSFGRFEKESLSWERRSSFSRNIYLE
AT1G23060.1		unknown protein	344	QTARNSTNIRSLAVRRS
AT1G23060.2		unknown protein	283	QTARNSTNIRSLAVRRS
AT1G23080.1	PIN7, ATPIN7	PIN7 (PIN-FORMED 7); auxin efflux transmembrane transporter/ auxin:hydrogen symporter/ transporter	198	DGKLHVTVRKSNASRRSFYG
AT1G23080.2	PIN7	PIN7 (PIN-FORMED 7); auxin efflux transmembrane transporter/ auxin:hydrogen symporter/ transporter	198	DGKLHVTVRKSNASRRSFYG
AT1G23080.3	PIN7	PIN7 (PIN-FORMED 7); auxin efflux transmembrane transporter/ auxin:hydrogen symporter/ transporter	198	DGKLHVTVRKSNASRRSFYG
AT1G23170.1		unknown protein	88	ASDTADVSDGGRSKWRSN
AT1G23200.1		pectinesterase family protein	117	LNHSRRSYGQYSSPHDRQTSLS
AT1G23200.1		pectinesterase family protein	201	FTKFSKQRSSAGGGSHRRLLLFSD
AT1G23270.1		unknown protein	123	QSVKSRGGLGESSGSKRIGSSSSRFS
AT1G23270.1		unknown protein	47	ETRLRRLKSLPVSRTDSVSSSPKKLLSHS
AT1G23320.1	TAR1	TAR1 (TRYPTOPHAN AMINOTRANSFERASE RELATED 1); L-tryptophan:2-oxoglutarate aminotransferase/ L-tryptophan:pyruvate aminotransferase/ carbon-sulfur lyase	5	ENSKKSDSGSNEDKSLSDD
AT1G23360.1		UbiE/COQ5 methyltransferase family protein	8	SPVTFTGKHPVNSRSRRRTVVKCSNERRIL
AT1G23390.1		kelch repeat-containing F-box family protein	42	VSKSWNRAVFYSLRRLKT
AT1G23460.1		polygalacturonase	218	ARSDSVRVSKVMVSSPGD
AT1G23550.1	SRO2	SRO2 (SIMILAR TO RCD ONE 2); NAD+ ADP-ribosyltransferase	228	LPSYIVSFRSPRLRVSRGGFASRPSSPW
AT1G23560.1		unknown protein	214	LCDRSKPKSQKDYHSCSNGRGR
AT1G23560.1		unknown protein	302	TEKSKADDIKERWRSHRRSKRRRFTTARS
AT1G23590.1		unknown protein	2	QSPKAEFKKSENNRSKSVSEMNTN
AT1G23600.1		unknown protein	16	QPPKGESKRSENVKSNSNT
AT1G23600.2		unknown protein	16	QPPKGESKRSENVKSNSNT
AT1G23640.1		unknown protein	16	QPPKAESRRSKNVKSNSVSEKDTN
AT1G23640.1		unknown protein	343	PDYVDQERLCKSRSPKSREEYKICSGGQ
AT1G23670.1		unknown protein	14	PPEVESKRSRNVKTKSVSETYP
AT1G23670.2		unknown protein	14	PPEVESKRSRNVKTKSVSETYP
AT1G23680.1		unknown protein	81	VFWSSPNKSNCRRQPKRSYGKKLL
AT1G23690.1		unknown protein	193	LYVDSERLCKDRKPKSREEYKRCSGGEG
AT1G23690.2		unknown protein	188	LYVDSERLCKDRKPKSREEYKRCSGGEG
AT1G23720.1		proline-rich extensin-like family protein	214	SPPPPYYSPSPKPVYKS
AT1G23720.1		proline-rich extensin-like family protein	389	SPPPPYYSPSPKPVYKS
AT1G23720.1		proline-rich extensin-like family protein	414	SPPPPYYSPSPKPSYKS
AT1G23720.1		proline-rich extensin-like family protein	464	SPPPPYYSPSPKVVYKS
AT1G23720.1		proline-rich extensin-like family protein	489	SPPPPYYSPSPKPSYKS
AT1G23720.1		proline-rich extensin-like family protein	870	SPPPPSYSPSPKAEYKSPPPPS
AT1G23760.1	JP630	JP630; polygalacturonase	501	LGRSVVLRTTESVAGSKEK
AT1G23770.1		F-box family protein	6	DSNNDSSPGEGSKRGNSG
AT1G23770.1		F-box family protein	82	DHGSDKFSFSKKLLSVSLR
AT1G23790.1		unknown protein	118	LMSTRGKIESSRPRRGSWGQNGDVSSP
AT1G23790.1		unknown protein	207	RKSCVVPPSSKFPRSKS
AT1G23790.1		unknown protein	241	KSSAKKNDSPPPSVRTRRA
AT1G23800.1	ALDH2B7, ALDH2B	ALDH2B7; 3-chloroallyl aldehyde dehydrogenase/ aldehyde dehydrogenase (NAD)	0	MASRRVSSLLSRSFMSSSRSIFSLRGMNRGAQRYS
AT1G23860.1	SRZ-21, SRZ21, RSZP21	RSZP21 (RS-CONTAINING ZINC FINGER PROTEIN 21); protein binding	98	HFARECRRGRGSVRRRSPSPRRRRSPDYGYARRSISPRGRRSPPRRRSVTPPRRGRSYSRSPPYRGSRRDSPRRRDSPYGRRSPYANG
AT1G23860.2	SRZ-21, SRZ21	RSZP21 (RS-CONTAINING ZINC FINGER PROTEIN 21); protein binding	98	HFARECRRGRGSVRRRSPSPRRRRSPDYGYARRSISPRGRRSPPRRRSVTPPRRGRSYSRSPPYRGSRRDSPRRRDSPYGRRSPYANG
AT1G23860.3	SRZ-21, SRZ21	RSZP21 (RS-CONTAINING ZINC FINGER PROTEIN 21); protein binding	98	HFARECRRGRGSVRRRSPSPRRRRSPDYGYARRSYSRSPPYRGSRRDSPRRRDSPYGRRSPYANG
AT1G23870.1	ATTPS9, TPS9	ATTPS9; transferase, transferring glycosyl groups / trehalose-phosphatase	43	YSDGSSDVNSSNSSRERK
AT1G23965.1		FUNCTIONS IN: molecular_function unknown; INVOLVED IN: biological_process unknown; LOCATED IN: cellular_component unknown; BEST Arabidopsis thaliana protein match is: ATP binding / DNA binding (TAIR:AT1G70270.1).	40	EESRSNREQRKQTKKKTGRGSGSGSI
AT1G23980.1		zinc finger (C3HC4-type RING finger) family protein	312	ESFSVSKIWQWSNKRSK
AT1G24030.1		protein kinase family protein	0	MHFPLVSAWNKRRRSKSYDTDPC
AT1G24030.2		protein kinase family protein	0	MHFPLVSAWNKRRRSKSYDTDPWVYRTA
AT1G24040.1		GCN5-related N-acetyltransferase (GNAT) family protein	26	SSSHRYPLLYSCKSHRSNLRFAFPPSSVS
AT1G24040.2		GCN5-related N-acetyltransferase (GNAT) family protein	26	SSSHRYPLLYSCKSHRSNLRFAFPPSSVS
AT1G24090.1		RNase H domain-containing protein	52	SVHSYSSRSKAVKSKMLSS
AT1G24120.1	ARL1	ARL1 (ARG1-LIKE 1); heat shock protein binding / unfolded protein binding	354	TIPLMKRSSSKNRMRKSSFKKAA
AT1G24130.1		transducin family protein / WD-40 repeat family protein	373	KPVKSLAVSVSDSDSNSDYS
AT1G24140.1		matrixin family protein	335	GSRSPPPSTQQRDTGDSGAPGRSDGSRSVLTNL
AT1G24147.1		unknown protein	38	TMRRNLEGNIDYRSSKRRTGGSVSNQCRSKSYI
AT1G24150.1	ATFH4, FH4	FH4 (FORMIN HOMOLOGUE 4); actin binding / protein binding	202	RGRSSTSHSVIHNDNYR
AT1G24150.1	ATFH4, FH4	FH4 (FORMIN HOMOLOGUE 4); actin binding / protein binding	514	VVRSEGKRCVLNRRTNRSFSRSSSSSISEVISK
AT1G24150.1	ATFH4, FH4	FH4 (FORMIN HOMOLOGUE 4); actin binding / protein binding	704	LPPNFMSDRSRSDSGGSDSD
AT1G24160.1		unknown protein	452	SSMEKRSGTTAYRSPSHGLKSN
AT1G24190.1	SIN3, ATSIN3, SNL3	SNL3 (SIN3-LIKE 3); transcription repressor	744	KSGSSSAGESEGSPHNYASVADSRRSKSSRKANEHSQLGQ
AT1G24220.1		paired amphipathic helix repeat-containing protein	592	KSSRTISPKANRTIPPKSKK
AT1G24240.1		ribosomal protein L19 family protein	4	RGSTRLLQRHRFSISNT
AT1G24280.1	G6PD3	G6PD3 (GLUCOSE-6-PHOSPHATE DEHYDROGENASE 3); glucose-6-phosphate dehydrogenase	54	VVRSQRRSVQSSVVVQDGSV
AT1G24290.1		AAA-type ATPase family protein	81	AADDSNKRHKLSSSSHRQH
AT1G24300.1		LOCATED IN: chloroplast; EXPRESSED IN: cultured cell; CONTAINS InterPro DOMAIN/s: GYF (InterPro:IPR003169); BEST Arabidopsis thaliana protein match is: GYF domain-containing protein (TAIR:AT1G27430.1); Has 21766 Blast hits to 10819 proteins in 514 species: Archae - 0; Bacteria - 738; Metazoa - 8216; Fungi - 1952; Plants - 1070; Viruses - 89; Other Eukaryotes - 9701 (source: NCBI BLink).	1241	QINRSSGDRNNMGSLHRNNSLLS
AT1G24300.1		LOCATED IN: chloroplast; EXPRESSED IN: cultured cell; CONTAINS InterPro DOMAIN/s: GYF (InterPro:IPR003169); BEST Arabidopsis thaliana protein match is: GYF domain-containing protein (TAIR:AT1G27430.1); Has 21766 Blast hits to 10819 proteins in 514 species: Archae - 0; Bacteria - 738; Metazoa - 8216; Fungi - 1952; Plants - 1070; Viruses - 89; Other Eukaryotes - 9701 (source: NCBI BLink).	421	VSHGSPEAVRSVFTKSPVLDGSESVV
AT1G24300.1		LOCATED IN: chloroplast; EXPRESSED IN: cultured cell; CONTAINS InterPro DOMAIN/s: GYF (InterPro:IPR003169); BEST Arabidopsis thaliana protein match is: GYF domain-containing protein (TAIR:AT1G27430.1); Has 21766 Blast hits to 10819 proteins in 514 species: Archae - 0; Bacteria - 738; Metazoa - 8216; Fungi - 1952; Plants - 1070; Viruses - 89; Other Eukaryotes - 9701 (source: NCBI BLink).	995	LRSHPGIQRSRSSTGFRQ
AT1G24330.1		armadillo/beta-catenin repeat family protein / U-box domain-containing family protein	360	YWRLAMSDSESPNSKSVDSV
AT1G24330.1		armadillo/beta-catenin repeat family protein / U-box domain-containing family protein	679	PSLVSISVNGSPRGRDKSQKLLMLFRE
AT1G24330.1		armadillo/beta-catenin repeat family protein / U-box domain-containing family protein	749	SRRKTMTRPFSFLWKKS
AT1G24388.1		unknown protein	5	EEREKSNPRKRYRIVNRSASSF
AT1G24430.1		transferase/ transferase, transferring acyl groups other than amino-acyl groups	210	TRRFVFLRSSVESLRERFS
AT1G24430.1		transferase/ transferase, transferring acyl groups other than amino-acyl groups	46	YHNKTNLSDKERSDHIKSSLSEIL
AT1G24490.1	ALB4, ARTEMIS	ALB4 (ALBINA 4)	20	KVLQFRRSRFSHTPSSSSSRYRTL
AT1G24490.2	ALB4, ARTEMIS	ALB4 (ALBINA 4)	20	KVLQFRRSRFSHTPSSSSSRYRTL
AT1G24530.1		transducin family protein / WD-40 repeat family protein	0	MRVISKLFDSDRRRIPKSPKHLDSGESAT
AT1G24570.1		unknown protein	0	MGILSRSPISSRRSSDDSMKLFT
AT1G24590.1	DRNL, DRN-LIKE, SOB2, ESR2	DRNL (DORNROSCHEN-LIKE); DNA binding / transcription factor	12	HRETNIHSLKRKPSRTSSTAPGSP
AT1G24706.1		unknown protein	1281	RTESIPSKSDQGHLKSK
AT1G24706.1		unknown protein	1425	SRTVHSPRHEIVTSVRSSDRLQ
AT1G24706.1		unknown protein	1466	AEHKEHDSEPRSSDRDRSVEARLDLNKT
AT1G24706.1		unknown protein	1626	GARHSQRLSPRHEEREKRRSEENLSVSVDDA
AT1G24764.1	ATMAP70-2	ATMAP70-2 (microtubule-associated proteins 70-2); microtubule binding	399	TRNTPEARSMSNGPSRRQ
AT1G24764.1	ATMAP70-2	ATMAP70-2 (microtubule-associated proteins 70-2); microtubule binding	458	KGTSKSFDGGTRSVDRGK
AT1G24764.1	ATMAP70-2	ATMAP70-2 (microtubule-associated proteins 70-2); microtubule binding	594	EKDQDARAKRFSNSKSPSNTA
AT1G24800.1		CONTAINS InterPro DOMAIN/s: Cyclin-like F-box (InterPro:IPR001810), F-box associated (InterPro:IPR006527), F-box associated type 1 (InterPro:IPR017451); BEST Arabidopsis thaliana protein match is: unknown protein (TAIR:AT1G25211.1); Has 745 Blast hits to 722 proteins in 30 species: Archae - 0; Bacteria - 0; Metazoa - 0; Fungi - 0; Plants - 743; Viruses - 0; Other Eukaryotes - 2 (source: NCBI BLin…	178	RNVSVYRYEIYDLRSNS
AT1G24851.1		unknown protein	69	RQLSPPKYPASRSVSNS
AT1G24881.1		CONTAINS InterPro DOMAIN/s: Cyclin-like F-box (InterPro:IPR001810), F-box associated (InterPro:IPR006527), F-box associated type 1 (InterPro:IPR017451); BEST Arabidopsis thaliana protein match is: unknown protein (TAIR:AT1G25211.1); Has 745 Blast hits to 722 proteins in 30 species: Archae - 0; Bacteria - 0; Metazoa - 0; Fungi - 0; Plants - 743; Viruses - 0; Other Eukaryotes - 2 (source: NCBI BLin…	178	RNVSVYRYEIYDLRSNS
AT1G25025.1		unknown protein	43	RQLSPPKYPASRSVSSS
AT1G25025.1		unknown protein	69	RQLSPPKYPASRSVSNS
AT1G25055.1		CONTAINS InterPro DOMAIN/s: Cyclin-like F-box (InterPro:IPR001810), F-box associated (InterPro:IPR006527), F-box associated type 1 (InterPro:IPR017451); BEST Arabidopsis thaliana protein match is: unknown protein (TAIR:AT1G25211.1); Has 745 Blast hits to 722 proteins in 30 species: Archae - 0; Bacteria - 0; Metazoa - 0; Fungi - 0; Plants - 743; Viruses - 0; Other Eukaryotes - 2 (source: NCBI BLin…	178	RNVSVYRYEIYDLRSNS
AT1G25112.1		unknown protein	43	RQLSPPKYPASRSVSSS
AT1G25112.1		unknown protein	69	RQLSPPKYPASRSVSNS
AT1G25141.1		UDP-3-0-acyl N-acetylglucosamine deacetylase family protein / F-box protein-related	670	RNVSVYRYEIYDLRSNS
AT1G25180.1		unknown protein	43	RQLSPPKYPASRSVSSS
AT1G25180.1		unknown protein	69	RQLSPPKYPASRSVSNS
AT1G25211.1		CONTAINS InterPro DOMAIN/s: Cyclin-like F-box (InterPro:IPR001810), F-box associated (InterPro:IPR006527), F-box associated type 1 (InterPro:IPR017451); BEST Arabidopsis thaliana protein match is: unknown protein (TAIR:AT1G25055.1); Has 745 Blast hits to 722 proteins in 30 species: Archae - 0; Bacteria - 0; Metazoa - 0; Fungi - 0; Plants - 743; Viruses - 0; Other Eukaryotes - 2 (source: NCBI BLin…	178	RNVSVYRYEIYDLRSNS
AT1G25280.1	AtTLP10	AtTLP10 (TUBBY LIKE PROTEIN 10); phosphoric diester hydrolase/ transcription factor	216	SSALITDRTSRSRFHSRRVSPKVPSGSYN
AT1G25280.1	AtTLP10	AtTLP10 (TUBBY LIKE PROTEIN 10); phosphoric diester hydrolase/ transcription factor	292	PYSLDDSFRSNISFSKSSFDHRSLDFSSSRFSE
AT1G25280.1	AtTLP10	AtTLP10 (TUBBY LIKE PROTEIN 10); phosphoric diester hydrolase/ transcription factor	8	DLRDGFGSLSRRSFDFRLSSLHKGKA
AT1G25280.2	AtTLP10	AtTLP10 (TUBBY LIKE PROTEIN 10); phosphoric diester hydrolase/ transcription factor	114	PYSLDDSFRSNISFSKSSFDHRSLDFSSSRFSE
AT1G25280.2	AtTLP10	AtTLP10 (TUBBY LIKE PROTEIN 10); phosphoric diester hydrolase/ transcription factor	38	SSALITDRTSRSRFHSRRVSPKVPSGSYN
AT1G25280.3	AtTLP10	AtTLP10 (TUBBY LIKE PROTEIN 10); phosphoric diester hydrolase/ transcription factor	114	PYSLDDSFRSNISFSKSSFDHRSLDFSSSRFSE
AT1G25280.3	AtTLP10	AtTLP10 (TUBBY LIKE PROTEIN 10); phosphoric diester hydrolase/ transcription factor	38	SSALITDRTSRSRFHSRRVSPKVPSGSYN
AT1G25320.1		leucine-rich repeat transmembrane protein kinase, putative	361	KEKKGSFCFRRDGSESPSSEN
AT1G25390.1		protein kinase family protein	243	AVIHRNYRRKDGSELSRDNSKSDVE
AT1G25390.1		protein kinase family protein	342	HHKNLVSLYGCTSRRSRE
AT1G25440.1		zinc finger (B-box type) family protein	355	FGDGGREARVSRYREKRRTRLFSKKIRYEVRKL
AT1G25440.1		zinc finger (B-box type) family protein	87	FTRKARTPRGSGKKNNSSI
AT1G25470.1		AP2 domain-containing transcription factor, putative	56	SESSQDRSNAVKTPRRKSTRQFK
AT1G25470.2		AP2 domain-containing transcription factor, putative	56	SESSQDRSNAVKTPRRKSTRQFK
AT1G25500.1		choline transporter-related	13	YASISSGDQSLQRSRRSGDGNRAVVRESRHWH
AT1G25500.2		choline transporter-related	13	YASISSGDQSLQRSRRSGDGNRAVVRESRHWH
AT1G25500.2		choline transporter-related	463	TEMSEVLHRRLQHRSSRAREVLTT
AT1G25500.3		choline transporter-related	405	TEMSEVLHRRLQHRSSRAREVLTT
AT1G25510.1		aspartyl protease family protein	70	LHSRVSVRGTEHSDYKSLT
AT1G25530.1		lysine and histidine specific transporter, putative	0	MVSSSPVSPSKETDRKSGEKW
AT1G25570.1		leucine-rich repeat protein-related	128	SWRSPWPESLLRDGSYSDL
AT1G25570.1		leucine-rich repeat protein-related	217	FGRSWQSDEDFRSEDSRSVARSLSTLEK
AT1G26090.1		unknown protein	21	LRTETPSLSRKRRAAYVAATSSR
AT1G26120.1		esterase-related	81	QNRRRRSNSDNCLSAFSDDT
AT1G26150.1	ATPERK10, PERK10	PERK10 (PROLINE-RICH EXTENSIN-LIKE RECEPTOR KINASE 10); ATP binding / protein kinase/ protein serine/threonine kinase/ protein tyrosine kinase	231	PPPGSKRPTPSPPSPSDSKRPVHPSPPSPP
AT1G26150.1	ATPERK10, PERK10	PERK10 (PROLINE-RICH EXTENSIN-LIKE RECEPTOR KINASE 10); ATP binding / protein kinase/ protein serine/threonine kinase/ protein tyrosine kinase	286	PPSSVVSPPSPPRKSVSGPDNPS
AT1G26160.1		metal-dependent phosphohydrolase HD domain-containing protein	15	RPFHRRSILASFHSSSRNFL
AT1G26190.1		phosphoribulokinase/uridine kinase family protein	142	KSSSRVGYRTLDVPPSR
AT1G26190.1		phosphoribulokinase/uridine kinase family protein	454	RNKNLKRGMSHSYSTQRDKNLSKLAGYSSSDRRYEERNHDSPANEG
AT1G26190.1		phosphoribulokinase/uridine kinase family protein	609	NLMRESSAERSRLARTGSSNSGNRGRSSKSSFLSNVESNK
AT1G26210.1		unknown protein	125	LKARTRTSAASRVQSRGKVSKT
AT1G26270.1		phosphatidylinositol 3- and 4-kinase family protein	96	VRSDSPLLLTRNNFHRSS
AT1G26330.1		DNA binding	1003	WDISKRSLVSRFVSPSNLIF
AT1G26360.1	ATMES13, MES13	MES13 (METHYL ESTERASE 13); hydrolase	104	NQTPRNSNSVVPPSFRRSTSV
AT1G26360.1	ATMES13, MES13	MES13 (METHYL ESTERASE 13); hydrolase	145	PKKSSAGFVRSSSSRQRSS
AT1G26360.1	ATMES13, MES13	MES13 (METHYL ESTERASE 13); hydrolase	28	KYKYVRRLSLMPSFRRRTLLPSLSCSGSS
AT1G26370.1		RNA helicase, putative	14	NSRPNPKSPTVSPFSMRQK
AT1G26410.1		FAD-binding domain-containing protein	380	LLDRPPTNSVSFKSKSDFV
AT1G26440.1	ATUPS5, UPS5	ATUPS5 (ARABIDOPSIS THALIANA UREIDE PERMEASE 5)	269	KPVLDSPRSSFREYLSDWNGRG
AT1G26440.2	ATUPS5	ATUPS5 (ARABIDOPSIS THALIANA UREIDE PERMEASE 5); allantoin uptake transmembrane transporter/ uracil transmembrane transporter/ xanthine transmembrane transporter	305	KPVLDSPRSSFREYLSDWNGRG
AT1G26440.3	ATUPS5	ATUPS5 (ARABIDOPSIS THALIANA UREIDE PERMEASE 5); allantoin uptake transmembrane transporter/ uracil transmembrane transporter/ xanthine transmembrane transporter	305	KPVLDSPRSSFREYLSDWNGRG
AT1G26440.4	ATUPS5	ATUPS5 (ARABIDOPSIS THALIANA UREIDE PERMEASE 5)	243	KPVLDSPRSSFREYLSDWNGRG
AT1G26510.1		F-box family protein	1	KTRSKKTKTENNQEKSK
AT1G26540.1		agenet domain-containing protein	299	LKRKPMRSCSAAKSMTPTS
AT1G26540.1		agenet domain-containing protein	34	NPGNSSRRKLRVRYSTLLDMDGS
AT1G26560.1	BGLU40	BGLU40 (BETA GLUCOSIDASE 40); catalytic/ cation binding / hydrolase, hydrolyzing O-glycosyl compounds	300	LMFGDYPSSMRSRVGSRLPVFTGSQSS
AT1G26590.1		zinc finger (C2H2 type) family protein	99	SDTESETSSAPMRKRSKRVVMKQSNSESLSN
AT1G26610.1		zinc finger (C2H2 type) family protein	124	SQSDTEASSSPIRRRSKRVVV
AT1G26610.1		zinc finger (C2H2 type) family protein	319	GSGSGSGRSSTKYDLRKSKRGFPSHGRKKIKYE
AT1G26620.1		unknown protein	148	NQLKSGRGDASHRSYPSGSCL
AT1G26620.1		unknown protein	790	YTWSSGLAVRRNSKRKRNVTN
AT1G26680.1		transcriptional factor B3 family protein	409	NIGNSSRKKRVSKNPREKVESS
AT1G26680.1		transcriptional factor B3 family protein	708	YLSLSEHRPKSESSSHRSYFVGSV
AT1G26700.1	MLO14, ATMLO14	MLO14 (MILDEW RESISTANCE LOCUS O 14); calmodulin binding	453	TRRKRRHGLYGDDSTIRT
AT1G26730.1		EXS family protein / ERD1/XPR1/SYG1 family protein	31	IQTSRKRSERPGILKRKLSGSRNFSGLTKRYSRTAS
AT1G26750.1		unknown protein	149	QSKTSAKDRFQTPSVRRL
AT1G26761.1		unknown protein	20	RRLSTLSLRFPTYRNKRVSP
AT1G26780.1	MYB117, AtMYB117	myb family transcription factor (MYB117)	194	MARKYREHSSAYRRRKLMSN
AT1G26780.2	MYB117, AtMYB117	myb family transcription factor (MYB117)	194	MARKYREHSSAYRRRKLMSN
AT1G26870.1	FEZ, ANAC009	FEZ (FEZ); transcription factor	153	SEPSPPSKRFFDSPVSPNDS
AT1G26870.1	FEZ, ANAC009	FEZ (FEZ); transcription factor	80	FYCPRDRKYRNSSRPNRVTGA
AT1G26880.1		60S ribosomal protein L34 (RPL34A)	52	GIPHLRPSEYKRSRLSRNRRTVNRAYGGV
AT1G26880.2		60S ribosomal protein L34 (RPL34A)	52	GIPHLRPSEYKRSRLSRNRRTVNRAYGGV
AT1G26930.1		kelch repeat-containing F-box family protein	87	SRADYCSIASVNRSLRSLIRSGEIYRLRRL
AT1G26945.1	KDR	KDR (KIDARI); transcription regulator	0	MSSRRSSRSRQSGSSRISDDQISD
AT1G26970.1		protein kinase, putative	6	FSAKVGNRESPYRGSSRISAKRSQSSRLSSLT
AT1G27050.1	ATHB54	ATHB54 (ARABIDOPSIS THALIANA HOMEOBOX PROTEIN 54); nucleic acid binding / transcription factor	278	HKKIEVTQRSSSMSRKRDKPYTNRHTPAR
AT1G27100.1		FUNCTIONS IN: molecular_function unknown; INVOLVED IN: biological_process unknown; LOCATED IN: vacuole; EXPRESSED IN: 23 plant structures; EXPRESSED DURING: 13 growth stages; CONTAINS InterPro DOMAIN/s: Protein of unknown function DUF569 (InterPro:IPR007679), Actin_cross-linking (InterPro:IPR008999); BEST Arabidopsis thaliana protein match is: unknown protein (TAIR:AT1G69900.1); Has 184 Blast hit…	175	EPGSPVSARSTKSSISRFAS
AT1G27100.1		FUNCTIONS IN: molecular_function unknown; INVOLVED IN: biological_process unknown; LOCATED IN: vacuole; EXPRESSED IN: 23 plant structures; EXPRESSED DURING: 13 growth stages; CONTAINS InterPro DOMAIN/s: Protein of unknown function DUF569 (InterPro:IPR007679), Actin_cross-linking (InterPro:IPR008999); BEST Arabidopsis thaliana protein match is: unknown protein (TAIR:AT1G69900.1); Has 184 Blast hit…	389	PPKTTSPPPHRRPTSSPLSAESPRTSSSLSDRSDSDSVESPPKSDGRTIYY
AT1G27190.1		leucine-rich repeat transmembrane protein kinase, putative	156	LSGSIPSQLSRLDRLRRLS
AT1G27200.1		unknown protein	41	LSSDRISTLSVRSDSLRPSLRVPTLS
AT1G27210.1		binding	115	VSTVIRRLRDPDSSVRS
AT1G27210.1		binding	354	RSPSLPVNRSYAATRQK
AT1G27210.1		binding	426	EKSREDSKVSSFGGLRSGSR
AT1G27250.1		paired amphipathic helix repeat-containing protein	101	VYTAKRKLLARSVTKRSSSSSS
AT1G27300.1		unknown protein	68	EESADSSPSKGKSEGQRQL
AT1G27385.1		unknown protein	2	CKTILRSVFVSESRRTSGARRCF
AT1G27385.2		unknown protein	2	CKTILRSVFVSESRRTSGARRCF
AT1G27385.3		unknown protein	2	CKTILRSVFVSESRRTSGARRCF
AT1G27385.4		unknown protein	2	CKTILRSVFVSESRRTSGARRCF
AT1G27410.1		DNA cross-link repair protein-related	71	SLSLRSPSSGSTVRLHL
AT1G27430.1		GYF domain-containing protein	101	LGARKVDRRKTERRIDSVSSRETGD
AT1G27430.1		GYF domain-containing protein	422	SHGSPEAVRSVFTKSSV
AT1G27500.1		kinesin light chain-related	33	SNQSPSRQSFGSYGDESKIDSD
AT1G27540.1		F-box family protein	23	LNLLPKAGSRSTLKRTSSIPD
AT1G27600.1		glycosyl transferase family 43 protein	1	ASIRRTLSPMYHDRSHENGGS
AT1G27600.1		glycosyl transferase family 43 protein	47	LGVTSDPKSSRRGPWRRPFYQ
AT1G27600.2		glycosyl transferase family 43 protein	1	ASIRRTLSPMYHDRSHENGGS
AT1G27600.2		glycosyl transferase family 43 protein	47	LGVTSDPKSSRRGPWRRPFYQ
AT1G27610.1		unknown protein	17	PTNPSPLRMRSGSARNSTKKKKILRS
AT1G27630.1	CYCT1;3	CYCT1;3 (CYCLIN T 1;3); cyclin-dependent protein kinase	31	SKWYFSREEIERFSPSRKDG
AT1G27650.1	ATU2AF35A	ATU2AF35A; RNA binding / nucleic acid binding / nucleotide binding / zinc ion binding	172	VKLVSRELRRKLFGRYRRSYRRGSRSRSRSRSISPRNKRDNDRRDPSHREFSHRDRDREFYRHGSGKRSSERSERQERDGSRGRRQASPKRGGSPGGGREGSEERRARIE
AT1G27650.2	ATU2AF35A	ATU2AF35A; RNA binding / nucleic acid binding / nucleotide binding / zinc ion binding	122	VKLVSRELRRKLFGRYRRSYRRGSRSRSRSRSISPRNKRDNDRRDPSHREFSHRDRDREFYRHGSGKRSSERSERQERDGSRGRRQASPKRGGSPGGGREGSEERRARIE
AT1G27660.1		ethylene-responsive protein -related	208	LSESRKMSMDDMSNISRP
AT1G27690.1		unknown protein	0	MDKKHGLFSKSNSRRPRSKSPVRSVSPIIIRRRKGRYVTQ
AT1G27690.1		unknown protein	177	GSKGSKSKNNSSKAVESG
AT1G27700.1		protein binding	258	LQRQLQRSQYRMRYSKSVHAA
AT1G27700.1		protein binding	72	KSSYDNRLSDETRDRHR
AT1G27710.1		glycine-rich protein	52	STEIGRESASMRNKARSSEIGRESKLMRN
AT1G27710.2		glycine-rich protein	52	STEIGRESASMRNKARSSEIGRESKLMRN
AT1G27730.1	STZ, ZAT10	STZ (salt tolerance zinc finger); nucleic acid binding / transcription factor/ transcription repressor/ zinc ion binding	24	FHGVEHWTKGKRSKRSRSDFHHQNLTEEE
AT1G27750.1		nucleic acid binding	417	NDVRSSAGSVYDAGGSRSMD
AT1G27750.1		nucleic acid binding	458	NQHTPSPSARGPSDLRSNSTDRRNNF
AT1G27840.1	ATCSA-1	transducin family protein / WD-40 repeat family protein	279	KGSSSAKASVEKSRQKR
AT1G27840.1	ATCSA-1	transducin family protein / WD-40 repeat family protein	7	RETGRIRSNSFANRFKSRRILSLQLSNRKDFVSPHRGSVNSLQV
AT1G27840.2	ATCSA-1	transducin family protein / WD-40 repeat family protein	222	KGSSSAKASVEKSRQKR
AT1G27840.2	ATCSA-1	transducin family protein / WD-40 repeat family protein	7	RETGRIRSNSFANRFKSRRILSLQLSNRKDFVSPHRGSVNSLQV
AT1G27840.3	ATCSA-1	transducin family protein / WD-40 repeat family protein	279	KGSSSAKASVEKSRQKR
AT1G27840.3	ATCSA-1	transducin family protein / WD-40 repeat family protein	7	RETGRIRSNSFANRFKSRRILSLQLSNRKDFVSPHRGSVNSLQV
AT1G27850.1		unknown protein	118	SVVRRGRPQSQISLSRSSTMEKSRRSSKGSASPNRLSTSPRAD
AT1G27850.1		unknown protein	166	RGRPSSARHPSPASGRRSGTPVRRISPTPGKPSGPVSRSPTPTSRRMSTGSTT
AT1G27850.1		unknown protein	221	SPAVRGTSPVSSSRGNSPSPKIKV
AT1G27850.1		unknown protein	267	RPASYVRGSSPASRNGRDAVSTRSRKSVSPSASRSVSSSHSHERDRFSSQSKGSVASSGD
AT1G27850.1		unknown protein	338	GGSERAVSKRASLSPNSRTSRSSKLLSPGSAPRRPF
AT1G27850.1		unknown protein	704	KRSVSMKSPVIQANNSSCFTRSYEGFSYSRDRSISLRSSTETASA
AT1G27850.1		unknown protein	751	SWDYGSSIRKGSHIRQRSGSTLDLE
AT1G27880.1		ATP-dependent DNA helicase, putative	180	KRGKKFPSKYKGVSKSRSSYSFRGKRYKKKEAD
AT1G27880.1		ATP-dependent DNA helicase, putative	33	HVPPVSRKMTSSSSRSKPKAPT
AT1G27880.1		ATP-dependent DNA helicase, putative	94	RFSSSVSSFSRLCSRAS
AT1G27910.1	PUB45, ATPUB45	PUB45 (PLANT U-BOX 45); ubiquitin-protein ligase	256	SKLSSFNFRSCNNNRRSS
AT1G27910.1	PUB45, ATPUB45	PUB45 (PLANT U-BOX 45); ubiquitin-protein ligase	745	SRKKMGRAFSFLWKSKSFS
AT1G27940.1	PGP13	PGP13 (P-GLYCOPROTEIN 13); ATPase, coupled to transmembrane movement of substances	623	CKSQAGSSSSRRVSSSRRTSSFRVDQE
AT1G27960.1	ECT9	ECT9 (evolutionarily conserved C-terminal region 9)	290	LTESNRGPRASRLNSKSKMISYDRVDRF
AT1G28000.1		FUNCTIONS IN: molecular_function unknown; INVOLVED IN: biological_process unknown; LOCATED IN: mitochondrion; BEST Arabidopsis thaliana protein match is: pentatricopeptide (PPR) repeat-containing protein (TAIR:AT1G28020.1); Has 219 Blast hits to 213 proteins in 14 species: Archae - 0; Bacteria - 2; Metazoa - 0; Fungi - 0; Plants - 216; Viruses - 0; Other Eukaryotes - 1 (source: NCBI BLink).	13	SRRLPSIRFAGTLTSPK
AT1G28010.1	PGP14	PGP14 (P-GLYCOPROTEIN 14); ATPase, coupled to transmembrane movement of substances	254	KSYSNSLKKALKLSKRS
AT1G28010.1	PGP14	PGP14 (P-GLYCOPROTEIN 14); ATPase, coupled to transmembrane movement of substances	614	ENLRSVMYESCRSQAGSYSSRRVFSSRRTSSFREDQE
AT1G28050.1		zinc finger (B-box type) family protein	392	KEKRKTRRYDKTIRYESRKARADT
AT1G28060.1		small nuclear ribonucleoprotein family protein / snRNP family protein	0	MDKERYSRSHRDDRDRDSSPDHSPQREGGRRRDRDVDSKRRDSDHYRSSRRGDREDERDRTKDRR
AT1G28060.1		small nuclear ribonucleoprotein family protein / snRNP family protein	71	GEREGSRDREKHHHERSHEGSKEKESRSKRKDREEENGARDG
AT1G28070.1		INVOLVED IN: biological_process unknown; LOCATED IN: cellular_component unknown; EXPRESSED IN: 23 plant structures; EXPRESSED DURING: 15 growth stages; BEST Arabidopsis thaliana protein match is: protein binding (TAIR:AT2G33510.1); Has 40 Blast hits to 35 proteins in 7 species: Archae - 0; Bacteria - 0; Metazoa - 0; Fungi - 0; Plants - 40; Viruses - 0; Other Eukaryotes - 0 (source: NCBI BLink).	80	RKSMSRGNYADQSSGES
AT1G28110.1	SCPL45	SCPL45 (SERINE CARBOXYPEPTIDASE-LIKE 45 PRECURSOR); serine-type carboxypeptidase	243	NYSRYVSEYYRGSMSSMCSK
AT1G28110.2	SCPL45	SCPL45 (SERINE CARBOXYPEPTIDASE-LIKE 45 PRECURSOR); serine-type carboxypeptidase	243	NYSRYVSEYYRGSMSSMCSK
AT1G28190.1		unknown protein	226	KKRKRFTVMKKKSQSDSSSKRKLQSKSKSKTKKSIMRKI
AT1G28260.1		INVOLVED IN: biological_process unknown; LOCATED IN: cellular_component unknown; EXPRESSED IN: 21 plant structures; EXPRESSED DURING: 13 growth stages; BEST Arabidopsis thaliana protein match is: SMG7 (TAIR:AT5G19400.1); Has 341 Blast hits to 340 proteins in 87 species: Archae - 0; Bacteria - 0; Metazoa - 225; Fungi - 71; Plants - 35; Viruses - 0; Other Eukaryotes - 10 (source: NCBI BLink).	115	RGYYHRLSEESGEQKSR
AT1G28260.2		INVOLVED IN: biological_process unknown; LOCATED IN: cellular_component unknown; EXPRESSED IN: 21 plant structures; EXPRESSED DURING: 13 growth stages; BEST Arabidopsis thaliana protein match is: SMG7 (TAIR:AT5G19400.1); Has 341 Blast hits to 340 proteins in 87 species: Archae - 0; Bacteria - 0; Metazoa - 225; Fungi - 71; Plants - 35; Viruses - 0; Other Eukaryotes - 10 (source: NCBI BLink).	115	RGYYHRLSEESGEQKSR
AT1G28270.1	RALFL4	RALFL4 (ralf-like 4); signal transducer	72	NVPCSRRGRSYYDCKKRRRNNPYRRG
AT1G28300.1	LEC2	LEC2 (LEAFY COTYLEDON 2); DNA binding / transcription factor	110	NRKNAMMRSRNNSSPNSS
AT1G28340.1	AtRLP4	AtRLP4 (Receptor Like Protein 4); protein binding	217	GGDRFWNRMRSFGKSADSPRSTEETI
AT1G28375.1		unknown protein	41	NKSPSLDLDPSFRVKSKSF
AT1G28390.1		protein kinase family protein	139	TLHDQLHSRSSLDSRLSSWNRRIKH
AT1G28390.1		protein kinase family protein	368	VRGGSRKNRKVSNVTTSV
AT1G28390.1		protein kinase family protein	438	KERPVTTAAMRLSKSRSVGIVRSHKTASRKR
AT1G28395.1		unknown protein	0	MSAARSVFRSAASRASS
AT1G28395.2		unknown protein	0	MSAARSVFRSAASRASS
AT1G28395.3		unknown protein	0	MSAARSVFRSAASRASS
AT1G28395.4		unknown protein	0	MSAARSVFRSAASRASS
AT1G28400.1		unknown protein	256	LYNDRNHGHYYRKSHSKSPAGYYSSPAT
AT1G28420.1	HB-1	HB-1 (homeobox-1); transcription factor	1076	ASKRSRSQLKSYIGHKAE
AT1G28420.1	HB-1	HB-1 (homeobox-1); transcription factor	120	AAAGSVPEQDSRSDSGSESGCSPYSNSRRNFASGSSSSRA
AT1G28440.1	HSL1	HSL1 (HAESA-Like 1); ATP binding / kinase/ protein serine/threonine kinase	395	RSLTRIRLAYNRFSGSV
AT1G28500.1		unknown protein	305	RSKTRQSEEKVESSQKRSR
AT1G28530.1		unknown protein	139	KRLRRSLSEDLSSGDLSK
AT1G28530.2		unknown protein	139	KRLRRSLSEDLSSGDLSK
AT1G28550.1	AtRABA1i	AtRABA1i (Arabidopsis Rab GTPase homolog A1i); GTP binding	25	KSNLLSRFTRNDFSHDSR
AT1G28600.1		lipase, putative	367	RSCLRSEIKKESLYNQS
AT1G28630.4		unknown protein	418	PQTRSRSTRTYLRQNRTSTN
AT1G28640.1		GDSL-motif lipase, putative	24	SSESRCRRFKSIISFGDSI
AT1G28650.1		lipase, putative	26	SSESRCRRYKSIISFGDSIA
AT1G28660.1		lipase, putative	25	SESRCRRFTSIISFGDS
AT1G28660.2		lipase, putative	25	SESRCRRFTSIISFGDS
AT1G28670.1	ARAB-1	ARAB-1; carboxylesterase/ hydrolase, acting on ester bonds	24	SSESRCRRFKSIISFGDSI
AT1G28680.1		transferase family protein	71	HYYPLAGSLRRSASDNRFELL
AT1G28690.1		pentatricopeptide (PPR) repeat-containing protein	497	KIREVMKRRRISKTIGRSWTSE
AT1G28695.1		unknown protein	303	SHVNSKWSPHLKCSRSW
AT1G29010.1		unknown protein	268	DQIIRDQDRSFSLRTERYDTVPDHG
AT1G29040.1		unknown protein	27	SSSRPKFLSSRSKQFSLDH
AT1G29040.2		unknown protein	27	SSSRPKFLSSRSKQFSLDH
AT1G29040.3		unknown protein	27	SSSRPKFLSSRSKQFSLDH
AT1G29040.4		unknown protein	27	SSSRPKFLSSRSKQFSLDH
AT1G29070.1		ribosomal protein L34 family protein	95	VRAGKAALCQTKRSRSRKSLARTHGFRRRMRTTSGRAT
AT1G29120.1		unknown protein	12	FRYLPDRGGFSKPSSRSARQFSSGVVS
AT1G29120.1		unknown protein	321	SSIRRETELIKPSRRSLD
AT1G29120.2		unknown protein	12	FRYLPDRGGFSKPSSRSARQFSSGVVS
AT1G29120.2		unknown protein	321	SSIRRETELIKPSRRSLD
AT1G29120.3		unknown protein	12	FRYLPDRGGFSKPSSRSARQFSSGVVS
AT1G29120.3		unknown protein	322	SSIRRETELIKPSRRSLD
AT1G29120.4		unknown protein	12	FRYLPDRGGFSKPSSRSARQFSSGVVS
AT1G29120.4		unknown protein	321	SSIRRETELIKPSRRSLD
AT1G29170.1	WAVE2, ATSCAR3, SCAR3	WAVE2	177	DKKHCKMKKKKTSSRSRDMSRLASLANQNAR
AT1G29170.1	WAVE2, ATSCAR3, SCAR3	WAVE2	231	EKRYDFQDHHSRSFESRSGSGYNECLS
AT1G29170.2	WAVE2	WAVE2	177	DKKHCKMKKKKTSSRSRDMSRLASLANQNAR
AT1G29170.2	WAVE2	WAVE2	231	EKRYDFQDHHSRSFESRSGSGYNECLS
AT1G29170.3	WAVE2	WAVE2	177	DKKHCKMKKKKTSSRSRDMSRLASLANQNAR
AT1G29170.3	WAVE2	WAVE2	231	EKRYDFQDHHSRSFESRSGSGYNECLS
AT1G29220.1		transcriptional regulator family protein	81	SSAHGTPRSLDNDESSR
AT1G29230.1	CIPK18, SnRK3.20, ATWL1, WL1	CIPK18 (CBL-INTERACTING PROTEIN KINASE 18); ATP binding / kinase/ protein kinase/ protein serine/threonine kinase	46	DTDKDGNISPQSPRSPRSPRNNILMGKYE
AT1G29240.1		unknown protein	12	LSTRRMQKTAGVSVRRNKSNN
AT1G29240.1		unknown protein	350	NLISAAKRSSSPYRHSRCMSPFRSTGNGSP
AT1G29240.1		unknown protein	488	ISSGFDRSPLAPPSPKRPSESWL
AT1G29280.1	WRKY65, ATWRKY65	WRKY65; transcription factor	30	NGMKALISSHSPKRSRRSVEKRVVNVPMKE
AT1G29290.1		unknown protein	81	AGKLRSRHLSTVDRYLRSVPSPG
AT1G29300.1	UNE1	UNE1 (unfertilized embryo sac 1)	64	KSTSSSRSGEIKVRERNRAV
AT1G29340.1	PUB17, ATPUB17	PUB17 (PLANT U-BOX 17); ubiquitin-protein ligase	0	MASAAIFSSLRRRRSPSLE
AT1G29340.1	PUB17, ATPUB17	PUB17 (PLANT U-BOX 17); ubiquitin-protein ligase	44	SCFTSVRFSFQRKNARS
AT1G29340.1	PUB17, ATPUB17	PUB17 (PLANT U-BOX 17); ubiquitin-protein ligase	77	DSNWGSTTTRTRARRRSKSSVSESTALLCL
AT1G29350.1		FUNCTIONS IN: molecular_function unknown; INVOLVED IN: biological_process unknown; LOCATED IN: cellular_component unknown; EXPRESSED IN: male gametophyte, guard cell, pollen tube; EXPRESSED DURING: L mature pollen stage, M germinated pollen stage; CONTAINS InterPro DOMAIN/s: Protein of unknown function DUF1296 (InterPro:IPR009719); BEST Arabidopsis thaliana protein match is: kinase-related (TAIR:…	89	TYNRGARGGSARYAGRSGSTHFS
AT1G29370.1		kinase-related	89	TYNRGARGGSARYAGRSGSTHFS
AT1G29390.1	COR314-TM2	COR314-TM2	51	DRQRTATVSARAEKRRKRGSSVVCY
AT1G29390.2	COR314-TM2	COR314-TM2	8	DRQRTATVSARAEKRRKRGSSVVCY
AT1G29395.1	COR414-TM1	COR414-TM1	23	KLRSRPSDLSGLGRHTSPV
AT1G29395.1	COR414-TM1	COR414-TM1	54	RTATVSTRVEKRRKRGSSVVCY
AT1G29400.1	AML5	AML5 (ARABIDOPSIS MEI2-LIKE PROTEIN 5); RNA binding / nucleic acid binding / nucleotide binding	367	LNSPVEGSPLQSVLSRSPV
AT1G29400.2	AML5	AML5 (ARABIDOPSIS MEI2-LIKE PROTEIN 5); RNA binding / nucleic acid binding / nucleotide binding	367	LNSPVEGSPLQSVLSRSPV
AT1G29410.1	PAI3	PAI3 (phosphoribosylanthranilate isomerase 3); phosphoribosylanthranilate isomerase	13	RALNFSKTSKSGLSNRKVSFSS
AT1G29410.2	PAI3	PAI3 (phosphoribosylanthranilate isomerase 3); phosphoribosylanthranilate isomerase	13	RALNFSKTSKSGLSNRKVSFSS
AT1G29420.1		FUNCTIONS IN: molecular_function unknown; INVOLVED IN: response to auxin stimulus; LOCATED IN: cellular_component unknown; CONTAINS InterPro DOMAIN/s: Auxin responsive SAUR protein (InterPro:IPR003676); BEST Arabidopsis thaliana protein match is: SAUR68 (SMALL AUXIN UPREGULATED 68) (TAIR:AT1G29510.1); Has 372 Blast hits to 362 proteins in 16 species: Archae - 0; Bacteria - 0; Metazoa - 0; Fungi -…	18	ALRRKRISFHRSTDTTSSS
AT1G29440.1		FUNCTIONS IN: molecular_function unknown; INVOLVED IN: response to auxin stimulus; EXPRESSED IN: 19 plant structures; EXPRESSED DURING: 10 growth stages; CONTAINS InterPro DOMAIN/s: Auxin responsive SAUR protein (InterPro:IPR003676); BEST Arabidopsis thaliana protein match is: SAUR68 (SMALL AUXIN UPREGULATED 68) (TAIR:AT1G29510.1); Has 327 Blast hits to 317 proteins in 15 species: Archae - 0; Bac…	18	ALHRKRISFQRSSVFTSSS
AT1G29450.1		auxin-responsive protein, putative	19	LHRKRISFQRSSSATSS
AT1G29470.1		dehydration-responsive protein-related	60	TTKSDFKSEEVDRGSKSFPD
AT1G29470.2		dehydration-responsive protein-related	60	TTKSDFKSEEVDRGSKSFPD
AT1G29490.1		auxin-responsive family protein	13	WQQRAALRRKRISFQRSNSTTSSS
AT1G29510.1	SAUR68	SAUR68 (SMALL AUXIN UPREGULATED 68)	20	LHRKRISFQRSNVFTSSS
AT1G29530.1		unknown protein	28	EHGSQDGRGSDSSLSSPGS
AT1G29560.1		nucleic acid binding / zinc ion binding	171	HERTPDWDWRDSESRMRSHERTQDRRGSESQGV
AT1G29560.1		nucleic acid binding / zinc ion binding	92	QKADSVYKRSNADTRVS
AT1G29560.2		nucleic acid binding / zinc ion binding	21	HERTPDWDWRDSESRMRSHERTQDRRGSESQGV
AT1G29600.1		zinc finger (CCCH-type) family protein	197	MPQGRTPDLRRNDSGRRYNTESRSWPENKEKE
AT1G29600.1		zinc finger (CCCH-type) family protein	88	ETESRLWQRARTQDRRGSESRMMFDGRTQWS
AT1G29640.1		unknown protein	33	VDFRENSERVWNKSSRRSKTTPLPS
AT1G29700.1		unknown protein	43	HLPSRSLSIRLSPNVSRSLTV
AT1G29760.1		FUNCTIONS IN: molecular_function unknown; INVOLVED IN: biological_process unknown; LOCATED IN: cellular_component unknown; EXPRESSED IN: 24 plant structures; EXPRESSED DURING: 15 growth stages; CONTAINS InterPro DOMAIN/s: Adipose-regulatory protein, Seipin (InterPro:IPR009617); BEST Arabidopsis thaliana protein match is: unknown protein (TAIR:AT2G34380.1); Has 396 Blast hits to 327 proteins in 54…	32	PIRSNSHQPSSLLRRRKSAHRRDLISSDIET
AT1G29790.1		FUNCTIONS IN: molecular_function unknown; INVOLVED IN: biological_process unknown; LOCATED IN: Golgi apparatus, plasma membrane; EXPRESSED IN: 23 plant structures; EXPRESSED DURING: 12 growth stages; BEST Arabidopsis thaliana protein match is: methyltransferase (TAIR:AT5G40830.2); Has 127 Blast hits to 127 proteins in 12 species: Archae - 0; Bacteria - 0; Metazoa - 0; Fungi - 0; Plants - 127; Vir…	143	HPLPRRRCFSRTPRNPSDSKPES
AT1G29790.2		FUNCTIONS IN: molecular_function unknown; INVOLVED IN: biological_process unknown; LOCATED IN: Golgi apparatus, plasma membrane; EXPRESSED IN: 23 plant structures; EXPRESSED DURING: 12 growth stages; BEST Arabidopsis thaliana protein match is: methyltransferase (TAIR:AT5G40830.2); Has 127 Blast hits to 127 proteins in 12 species: Archae - 0; Bacteria - 0; Metazoa - 0; Fungi - 0; Plants - 127; Vir…	143	HPLPRRRCFSRTPRNPSDSKPES
AT1G29820.1		unknown protein	76	PFVDSSPVDDLRSRSVSSLDFK
AT1G29820.1		unknown protein	8	SVSQESKSKKLESKNHSGVPKSD
AT1G29820.2		unknown protein	76	PFVDSSPVDDLRSRSVSSLDFK
AT1G29820.2		unknown protein	8	SVSQESKSKKLESKNHSGVPKSD
AT1G29830.1		unknown protein	71	IDSPAVDYLRSRSVSSLDFKEAH
AT1G29830.2		unknown protein	71	IDSPAVDYLRSRSVSSLDFKEAH
AT1G29830.3		unknown protein	106	IDSPAVDYLRSRSVSSLDFKEAH
AT1G29900.1	CARB	CARB (CARBAMOYL PHOSPHATE SYNTHETASE B); ATP binding / carbamoyl-phosphate synthase/ catalytic	22	PRFSPSKLSYSTFFSRSA
AT1G29940.1	NRPA2	NRPA2; DNA binding / DNA-directed RNA polymerase/ ribonucleoside binding	171	PKRNHPTSMIRNSFRDRKEGYSSKAVVTR
AT1G29940.1	NRPA2	NRPA2; DNA binding / DNA-directed RNA polymerase/ ribonucleoside binding	797	DLSDQNSRFDSGSKSFRRSTNKAEHFRI
AT1G30010.1		intron maturase, type II family protein	560	RSSLAKLYAARYRLKSRAKVYSIASRDLS
AT1G30050.1		unknown protein	322	SISPSPSSPASPSRLSVST
AT1G30060.1		COP1-interacting protein-related	91	VRVEEKEMRKSKSESDNKSRKKPSSSKAKGL
AT1G30100.1	NCED5, ATNCED5	NCED5 (NINE-CIS-EPOXYCAROTENOID DIOXYGENASE 5); 9-cis-epoxycarotenoid dioxygenase	25	PSPSSSVSFTNTKPRRRKLSANSVSDTPNLL
AT1G30120.1	PDH-E1 BETA	PDH-E1 BETA (PYRUVATE DEHYDROGENASE E1 BETA); pyruvate dehydrogenase (acetyl-transferring)	30	SRTNLSVRSQRYIVAGSDASKKSFGSGLRVRHS
AT1G30160.2		unknown protein	0	MSRLLSKLSPLIHKSSRNIRSFSSS
AT1G30170.1		unknown protein	0	MSRLLSKLSPLIHKRSVRSFSSS
AT1G30170.1		unknown protein	170	SDHFPTSNLTYSKRDRK
AT1G30190.1		unknown protein	185	HVNPNKPYGRSKSDKPRRKRLSVDTETTKRKSYGRKKSDCSRWMVI
AT1G30210.1	TCP24, ATTCP24	TCP24 (TEOSINTE BRANCHED1, CYCLOIDEA, AND PCF FAMILY 24); transcription factor	37	SSRIIRVSRASGGKDRHSK
AT1G30210.2	TCP24	TCP24 (TEOSINTE BRANCHED1, CYCLOIDEA, AND PCF FAMILY 24); transcription factor	37	SSRIIRVSRASGGKDRHSK
AT1G30270.1	CIPK23, SnRK3.23, ATCIPK23, LKS1	CIPK23 (CBL-INTERACTING PROTEIN KINASE 23); kinase/ protein binding / protein serine/threonine kinase	0	MASRTTPSRSTPSRSTPSGSSSGGRTR
AT1G30280.1		heat shock protein binding	108	SAKEGSKKQSSMTKPRSNSS
AT1G30280.1		heat shock protein binding	153	SSFTSRLRPLNVPSRSHKRESKKQSFSAVPK
AT1G30280.1		heat shock protein binding	39	PPRSVLTRKFSGDFSRSDC
AT1G30300.1		unknown protein	3	SSIPSENGSVTSDRDRSA
AT1G30320.1		remorin family protein	26	LNNMKREGSKSNSNSSRTSPSRLQIP
AT1G30330.1	ARF6	ARF6 (AUXIN RESPONSE FACTOR 6); transcription factor	798	VYKSGSFGRSLDISKFSS
AT1G30330.2	ARF6	ARF6 (AUXIN RESPONSE FACTOR 6); transcription factor	800	VYKSGSFGRSLDISKFSS
AT1G30400.1	ATMRP1, EST1, ATABCC1, MRP1	MRP1 (ARABIDOPSIS THALIANA MULTIDRUG RESISTANCE-ASSOCIATED PROTEIN 1); ATPase, coupled to transmembrane movement of substances / xenobiotic-transporting ATPase	1074	TSREIKRMDSTTRSPVY
AT1G30400.2	ATMRP1, EST1	MRP1 (ARABIDOPSIS THALIANA MULTIDRUG RESISTANCE-ASSOCIATED PROTEIN 1); ATPase, coupled to transmembrane movement of substances / xenobiotic-transporting ATPase	1074	TSREIKRMDSTTRSPVY
AT1G30410.1	ATMRP13	ATMRP13; ATPase, coupled to transmembrane movement of substances	1039	YQSTSREVRRLDSVTRSPIYA
AT1G30420.1	ATMRP12	ATMRP12; ATPase, coupled to transmembrane movement of substances	1069	YQSTSREVRRLDSVTRSPIYA
AT1G30460.1	CPSF30, ATCPSF30	CPSF30; RNA binding / calmodulin binding / endonuclease/ nucleic acid binding / protein binding	562	SSARPGPSNRKTPERSD
AT1G30470.1		SIT4 phosphatase-associated family protein	490	VYSWACGRPTSLHDRSRDSDDDDYHDRDYDV
AT1G30510.1	ATRFNR2	ATRFNR2 (ROOT FNR 2); FAD binding / NADP or NADPH binding / electron carrier/ ferredoxin-NADP+ reductase/ oxidoreductase	7	QAGAVSVSIENQRSLRRSVFKNNSISFNSKSWS
AT1G30510.2	ATRFNR2	ATRFNR2 (ROOT FNR 2); FAD binding / NADP or NADPH binding / electron carrier/ ferredoxin-NADP+ reductase/ oxidoreductase	7	QAGAVSVSIENQRSLRRSVFKQNNSISFNSKSW
AT1G30550.1		FUNCTIONS IN: molecular_function unknown; INVOLVED IN: biological_process unknown; EXPRESSED IN: 21 plant structures; EXPRESSED DURING: 12 growth stages; BEST Arabidopsis thaliana protein match is: WW domain-containing protein (TAIR:AT1G45231.2); Has 891 Blast hits to 591 proteins in 275 species: Archae - 68; Bacteria - 248; Metazoa - 211; Fungi - 176; Plants - 45; Viruses - 3; Other Eukaryotes -…	152	THESHNMTRSMKLKKRSRLKKEVKST
AT1G30600.1		subtilase family protein	41	KDRPSVHFSGRESSDSKHS
AT1G30610.1	emb2279	emb2279 (embryo defective 2279)	190	PEDESFRKRYSKQEYHRSSDTSRGIERGSRGDELD
AT1G30610.1	emb2279	emb2279 (embryo defective 2279)	256	SGESSVTMPKDESFRRRYSKQEHHRSSDTSRGIARGSKGDE
AT1G30610.1	emb2279	emb2279 (embryo defective 2279)	340	MVRYQRVSDTSRGIERGSKGDG
AT1G30610.1	emb2279	emb2279 (embryo defective 2279)	966	LRLMDDVNRRLGSRSESSDSVLGNL
AT1G30640.1		protein kinase, putative	531	KDLLDSPIYSEGSRGSSGSPFSRPNQSQAR
AT1G30680.1		toprim domain-containing protein	41	SSPSYSSSRQVSSVSRRFRPVLASRPVSKNSPY
AT1G30680.1		toprim domain-containing protein	688	GSYSDSPVTPGMPERRSPKR
AT1G30755.1		unknown protein	10	DDDKKKKLRSNDDDKSRGFSGKLKSMRRSKTSDSYYSDNYGGSRRKSSKPDEV
AT1G30755.1		unknown protein	583	SRSTGNSPKVDLSDKNS
AT1G30800.1		FUNCTIONS IN: molecular_function unknown; LOCATED IN: anchored to membrane; EXPRESSED IN: flower; EXPRESSED DURING: petal differentiation and expansion stage; CONTAINS InterPro DOMAIN/s: FAS1 domain (InterPro:IPR000782); BEST Arabidopsis thaliana protein match is: unknown protein (TAIR:AT4G29980.1); Has 38 Blast hits to 38 proteins in 5 species: Archae - 0; Bacteria - 0; Metazoa - 0; Fungi - 0; P…	194	PFQPSSRRRHPDGSNSDTNQTSA
AT1G30810.1		transcription factor	128	PMKKKPKSRKRKRRRNSRMGSSKRRSGSSPAESTSSPE
AT1G30820.1		CTP synthase, putative / UTP--ammonia ligase, putative	437	GSKTHMGGTMRLGSRKS
AT1G30850.1		unknown protein	226	DRETETLALRSVLKTRSTRDHRRSAESSPQRRVRFSTSS
AT1G30850.1		unknown protein	51	KSITPLFSRSSARDDSFR
AT1G30860.1		protein binding / zinc ion binding	103	SRSDSGVSVQDSGLSES
AT1G30860.1		protein binding / zinc ion binding	137	SRSHGLVSDSGESKWGR
AT1G30860.1		protein binding / zinc ion binding	401	EENTSPSEYLSRESRLRQNQD
AT1G30870.1		cationic peroxidase, putative	103	LDYEGTERRSPASKTLRGFE
AT1G31000.1		F-box family protein	0	MTRRRTKKTEIRNDSDSVRI
AT1G31000.1		F-box family protein	107	PRTGKSIYLPKVKSRSK
AT1G31010.1	OSB4	OSB4 (organellar single-stranded DNA binding protein 4); single-stranded DNA binding	4	GRSISKSIRPSLNSTARKS
AT1G31020.1	ATO2	ATO2 (Arabidopsis thioredoxin o2)	32	TSLLNRRSFCFAEGDRSS
AT1G31080.1		F-box family protein	305	AGTSRSPPKQSTSTSSREDH
AT1G31120.1	KUP10	KUP10; potassium ion transmembrane transporter	155	YSRTTFHERSFAAKTKR
AT1G31170.1	ATSRX, SRX	SRX (SULFIREDOXIN); DNA binding / oxidoreductase, acting on sulfur group of donors	10	SLRSFSVSASSSNGSPP
AT1G31170.2	ATSRX, SRX	SRX (SULFIREDOXIN); DNA binding / oxidoreductase, acting on sulfur group of donors	10	SLRSFSVSASSSNGSPP
AT1G31170.3	ATSRX, SRX	SRX (SULFIREDOXIN); DNA binding / oxidoreductase, acting on sulfur group of donors	10	SLRSFSVSASSSNGSPP
AT1G31220.1		phosphoribosylglycinamide formyltransferase	29	TPSRNVLSFSFRSPAER
AT1G31240.1		DNA binding	175	PDSSLCSDRCSKDNRSDHLWENSDS
AT1G31310.1		hydroxyproline-rich glycoprotein family protein	259	DSDTSEYSDTSPAKRRRTMPT
AT1G31310.1		hydroxyproline-rich glycoprotein family protein	297	RSKRDEETTVAAALSRS
AT1G31330.1	PSAF	PSAF (photosystem I subunit F)	12	PRSNKSLTQSVPKSSARF
AT1G31450.1		aspartyl protease family protein	48	TVSDRLNAAFLRSISRSRRFTTKTDLQSG
AT1G31460.1		unknown protein	100	GSVSLSDEDSSNLSRKKRDLDLKSSS
AT1G31460.1		unknown protein	182	PSTDSEPEKKSKPKSKSSWFDKLSPSKLIGSIWRSSPKKS
AT1G31480.1	SGR2	SGR2 (SHOOT GRAVITROPISM 2); phospholipase A1	272	NGIKLRRGYAGSYSPKPTQE
AT1G31480.1	SGR2	SGR2 (SHOOT GRAVITROPISM 2); phospholipase A1	38	HGRQKYLAQTRSPSDGSDV
AT1G31480.1	SGR2	SGR2 (SHOOT GRAVITROPISM 2); phospholipase A1	875	SPTESTEGDDSPKDSSRPHSW
AT1G31600.1		oxidoreductase, 2OG-Fe(II) oxygenase family protein	389	IDKVKDKVIRRSSRRVSFTLRKVRNHPCS
AT1G31600.2		oxidoreductase, 2OG-Fe(II) oxygenase family protein	302	IDKVKDKVIRRSSRRVSFTLRKVRNHPCS
AT1G31600.3		oxidoreductase, 2OG-Fe(II) oxygenase family protein	389	IDKVKDKVIRRSSRRVSFTLRKVRNHPCS
AT1G31630.1	AGL86	AGL86 (AGAMOUS-LIKE 86); DNA binding / transcription factor	0	MRSKIKLSLIANKTSRRTTFRKRKGGIT
AT1G31650.1	ATROPGEF14, ROPGEF14	ROPGEF14; Rho guanyl-nucleotide exchange factor	266	IGSRAEGKNKSTSESKRWW
AT1G31660.1		FUNCTIONS IN: molecular_function unknown; INVOLVED IN: biological_process unknown; LOCATED IN: cellular_component unknown; EXPRESSED IN: 21 plant structures; EXPRESSED DURING: 13 growth stages; CONTAINS InterPro DOMAIN/s: Bystin (InterPro:IPR007955); Has 370 Blast hits to 362 proteins in 156 species: Archae - 0; Bacteria - 7; Metazoa - 139; Fungi - 93; Plants - 32; Viruses - 0; Other Eukaryotes -…	15	SDDASVASSRKRSKVPKTHQK
AT1G31670.1		copper amine oxidase, putative	563	RSELVTKRTPKSVNTPRKSYWTTKR
AT1G31690.1		amine oxidase/ copper ion binding / quinone binding	488	ELVTKRTPKSVNTPRKSYWTTKRN
AT1G31710.1		copper amine oxidase, putative	490	RNELVTTRSPKSVNTPRKTYWTTK
AT1G31730.1		epsilon-adaptin, putative	176	AIMALHRFHRKSPSSVSHLVSNFRKRL
AT1G31780.1		FUNCTIONS IN: molecular_function unknown; INVOLVED IN: biological_process unknown; LOCATED IN: cellular_component unknown; EXPRESSED IN: 24 plant structures; EXPRESSED DURING: 15 growth stages; CONTAINS InterPro DOMAIN/s: Conserved oligomeric complex COG6 (InterPro:IPR010490); Has 281 Blast hits to 279 proteins in 131 species: Archae - 0; Bacteria - 2; Metazoa - 132; Fungi - 106; Plants - 21; Vir…	35	SSFYDENSAHARRNLRS
AT1G31780.1		FUNCTIONS IN: molecular_function unknown; INVOLVED IN: biological_process unknown; LOCATED IN: cellular_component unknown; EXPRESSED IN: 24 plant structures; EXPRESSED DURING: 15 growth stages; CONTAINS InterPro DOMAIN/s: Conserved oligomeric complex COG6 (InterPro:IPR010490); Has 281 Blast hits to 279 proteins in 131 species: Archae - 0; Bacteria - 2; Metazoa - 132; Fungi - 106; Plants - 21; Vir…	475	AEAHKSKKSGQLPRRSRTSSDSSQ
AT1G31860.1	AT-IE, HISN2	AT-IE; phosphoribosyl-AMP cyclohydrolase/ phosphoribosyl-ATP diphosphatase	17	FIPKPYSFRDTKLRSRSNVVFA
AT1G31860.1	AT-IE, HISN2	AT-IE; phosphoribosyl-AMP cyclohydrolase/ phosphoribosyl-ATP diphosphatase	90	STTISSRKATFFSRSRSTLWTK
AT1G31870.1		unknown protein	110	DTQSNISPPRRQRTRNDSPSPEPGPRRSVADRVDTDMSPPRRRKRHNSPSPEPNRKHTKPVSLDSDMSPPRKRKARNDSPSPEPE
AT1G31870.1		unknown protein	197	YLSEDLSPPRRRHVHSPSRESSRKRSDSVELDDDLSPPRRKRD
AT1G31870.1		unknown protein	243	SPVSDVKKKSNDLSPPRRRRYHSPSPEPARRSSKSFGSNADLSPPGRNI
AT1G31870.1		unknown protein	296	SQDSDLSPQRKAADLRRSSENVSRSSNFDSSPPRRPRRDSSPPQISKE
AT1G31870.2		unknown protein	110	DTQSNISPPRRQRTRNDSPSPEPGPRRSVADRVDTDMSPPRRRKRHNSPSPEPNRKHTKPVSLDSDMSPPRKRKARNDSPSPEPE
AT1G31870.2		unknown protein	197	YLSEDLSPPRRRHVHSPSRESSRKRSDSVELDDDLSPPRRKRD
AT1G31870.2		unknown protein	243	SPVSDVKKKSNDLSPPRRRRYHSPSPEPARRSSKSFGSNADLSPPGRNI
AT1G31870.2		unknown protein	296	SQDSDLSPQRKAADLRRSSENVSRSSNFDSSPPRRPRRDSSPPQISKE
AT1G31880.1	NIP3;1, NLM9, BRX	BRX (BREVIS RADIX); identical protein binding / water channel	207	RSDDQSQRDSTYSKMDS
AT1G31930.1	XLG3	XLG3 (extra-large GTP-binding protein 3); guanyl nucleotide binding / signal transducer	222	IDESKRSKLGKHSRVLSRLLSP
AT1G31930.2	XLG3	XLG3 (extra-large GTP-binding protein 3); guanyl nucleotide binding / signal transducer	222	IDESKRSKLGKHSRVLSRLLSP
AT1G31940.1		unknown protein	3	IFSRFSVGRSTHRRTQSAI
AT1G32000.1		FUNCTIONS IN: molecular_function unknown; INVOLVED IN: biological_process unknown; LOCATED IN: chloroplast; BEST Arabidopsis thaliana protein match is: myosin heavy chain-related (TAIR:AT5G38190.1); Has 8 Blast hits to 8 proteins in 1 species: Archae - 0; Bacteria - 0; Metazoa - 0; Fungi - 0; Plants - 8; Viruses - 0; Other Eukaryotes - 0 (source: NCBI BLink).	20	SSTSNRGYFGCPRRDRSPSPIRVV
AT1G32010.1		myosin heavy chain-related	14	RERTPSDLSGKKSPSIGWSEESSRRSVGSSTHRGNSAEV
AT1G32010.1		myosin heavy chain-related	420	ITVGQKGSSGRSVDRERSGLDTSGSKRPCS
AT1G32010.1		myosin heavy chain-related	483	SFRYEYKVRDSPFSADR
AT1G32030.1		DNA binding	163	KRKHSDSEPKKAKTPYS
AT1G32080.1		membrane protein, putative	14	SSPARNRLSCSKIRFGSK
AT1G32090.1		early-responsive to dehydration protein-related / ERD protein-related	38	FPKWYLTGERNSPRRSDRTLVGKFVN
AT1G32120.1		unknown protein	529	SVTGSSIEVSRADGRSHGSSSYAGSLTGS
AT1G32120.1		unknown protein	566	KKPEWVQRSSHRPKKSPDRSSDEPEW
AT1G32120.1		unknown protein	594	TSSARSTKSPARSSDNLKWVQRSSPRSTKSPDRSSGRAADDVKDL
AT1G32120.1		unknown protein	659	PSSPGRSPSKTHTFSPKQSDSPV
AT1G32120.1		unknown protein	720	IKHHNSTSSRVSKESNRTPSVSSYPLKRKTSQRSPE
AT1G32120.1		unknown protein	779	SLSVSSSSTRKKPPRSHEAANSRGYN
AT1G32120.1		unknown protein	819	SSLSGSSSTRKKPPRSHEASSSRGYNHPPSPRVSKELNKTPSISGSPSATRNKSPRSSENVNSCGNS
AT1G32130.1		FUNCTIONS IN: molecular_function unknown; INVOLVED IN: biological_process unknown; LOCATED IN: cellular_component unknown; EXPRESSED IN: 25 plant structures; EXPRESSED DURING: 15 growth stages; CONTAINS InterPro DOMAIN/s: TFIIS N-terminal (InterPro:IPR017923), IWS1, C-terminal (InterPro:IPR008654); BEST Arabidopsis thaliana protein match is: IWS1 C-terminus family protein (TAIR:AT4G19000.1); Has …	412	RERKTGLTSGQSSRGDR
AT1G32150.1		bZIP transcription factor family protein	181	CSKSAESGSDGSSDGSDANSQNDSGSRHN
AT1G32180.1	ATCSLD6, CSLD6	ATCSLD6; cellulose synthase/ transferase, transferring glycosyl groups	4	ESPLRHPRISHVSNSGSDFGS
AT1G32180.1	ATCSLD6, CSLD6	ATCSLD6; cellulose synthase/ transferase, transferring glycosyl groups	628	HSSRLGRPPGSLTGSRKPL
AT1G32220.1		binding / catalytic/ coenzyme binding	17	SGASFRPRSFSPRLFKSCVK
AT1G32225.1		unknown protein	17	ISITVSPPYSSRFHRRKFMDGSL
AT1G32230.1	RCD1, CEO, CEO1, ATP8	RCD1 (RADICAL-INDUCED CELL DEATH1); protein binding	487	RGSGSANSVGSSTTRPK
AT1G32230.2	RCD1, CEO, CEO1, ATP8	RCD1 (RADICAL-INDUCED CELL DEATH1); protein binding	486	RGSGSANSVGSSTTRPK
AT1G32230.3		RCD1 (RADICAL-INDUCED CELL DEATH1); protein binding	486	RGSGSANSVGSSTTRPK
AT1G32240.1	KAN2	KAN2 (KANADI 2); DNA binding / transcription factor	13	ISPPNSKPSSTWQRRRST
AT1G32290.1		unknown protein	9	RSRWWSESVTADGSDGR
AT1G32340.1	NHL8	NHL8; protein binding / zinc ion binding	334	YGVTCSRDKRAVSGSRSPDSDIPYIRSYD
AT1G32340.1	NHL8	NHL8; protein binding / zinc ion binding	58	QNLDHSTKPSKSHRNRRSRGSNSKPRPVEKPEV
AT1G32361.1	ATL1F	ATL1F; protein binding / zinc ion binding	255	ESYERRMKASNLRFWRSHS
AT1G32375.1		F-box family protein	53	EYGSFSRFVDRSFTLHD
AT1G32380.1		ribose-phosphate pyrophosphokinase 2 / phosphoribosyl diphosphate synthetase 2 (PRS2)	22	SSLFSRSSISFRTTESRSRICVS
AT1G32380.1		ribose-phosphate pyrophosphokinase 2 / phosphoribosyl diphosphate synthetase 2 (PRS2)	74	DSSRLEKSVSRNNTKLKL
AT1G32400.1	TOM2A	TOM2A (TOBAMOVIRUS MULTIPLICATION 2A); protein binding	226	TLDQRPSRSDPWSARMREKYG
AT1G32400.2	TOM2A	TOM2A (TOBAMOVIRUS MULTIPLICATION 2A); protein binding	226	TLDQRPSRSDPWSARMREKYG
AT1G32400.3	TOM2A	TOM2A (TOBAMOVIRUS MULTIPLICATION 2A); protein binding	226	TLDQRPSRSDPWSARMREKYG
AT1G32415.1		pentatricopeptide (PPR) repeat-containing protein	10	GFLSKLSLRSSISCRRYYGDK
AT1G32420.1		F-box family protein	15	SSTQRLSRRKISAGEKSGNVN
AT1G32440.1	PKp3	PKp3 (plastidial pyruvate kinase 3); pyruvate kinase	18	SSSRNIGVSLSPLRRTL
AT1G32440.1	PKp3	PKp3 (plastidial pyruvate kinase 3); pyruvate kinase	39	VRSTSISLRQCSLSVRSIKISEDSRKPKAY
AT1G32440.1	PKp3	PKp3 (plastidial pyruvate kinase 3); pyruvate kinase	81	SSSYRLADSRTSSNDSRRKTKIV
AT1G32490.1	EMB2733, ESP3	ESP3 (ENHANCED SILENCING PHENOTYPE 3); ATP binding / ATP-dependent RNA helicase/ ATP-dependent helicase/ helicase/ nucleic acid binding	106	VVVEKKSSVSESRKSDKGKKRFRKKSGQSDESDGEV
AT1G32490.1	EMB2733, ESP3	ESP3 (ENHANCED SILENCING PHENOTYPE 3); ATP binding / ATP-dependent RNA helicase/ ATP-dependent helicase/ helicase/ nucleic acid binding	718	SKASATQRAGRAGRTSPGKCYRLY
AT1G32500.1	ATNAP6	ATNAP6 (NON-INTRINSIC ABC PROTEIN 6); protein binding / transporter	13	PNLSSKPKLKSNRRTTSTSVSVRA
AT1G32580.1		plastid developmental protein DAG, putative	51	RFTTIRTRMDRSGGSYSPLKSGSNFSDRAP
AT1G32610.1		hydroxyproline-rich glycoprotein family protein	218	RPQSPTAYRNLLSPRSPSPL
AT1G32610.2		hydroxyproline-rich glycoprotein family protein	218	RPQSPTAYRNLLSPRSPSPL
AT1G32690.1		unknown protein	109	DSVIDSGLDHGRSKKTSSFWR
AT1G32730.1		unknown protein	191	VSELKLRLRSNSARTESFKKRIA
AT1G32750.1	HAF01, HAF1, HAC13, GTD1, TAF1	HAF01; DNA binding / histone acetyltransferase	1529	ISSKAKPKESKGESERRSHSLMPTFSRERGESESHKPSVSGQP
AT1G32750.1	HAF01, HAF1, HAC13, GTD1, TAF1	HAF01; DNA binding / histone acetyltransferase	1636	MSSLEESPRFESRKTKRMA
AT1G32750.1	HAF01, HAF1, HAC13, GTD1, TAF1	HAF01; DNA binding / histone acetyltransferase	436	FGSRGSQSTNESTNKSRHH
AT1G32790.1	CID11	RNA-binding protein, putative	334	GSLPIRVSPSKTPVRPRSPRHPM
AT1G32810.2		protein binding / zinc ion binding	635	TSKKSMQHNRTSHSSVSKTRESSS
AT1G32810.2		protein binding / zinc ion binding	755	KRTSSSGSKDHTTFSRRKNKDTSKEG
AT1G32810.2		protein binding / zinc ion binding	783	NLRDDDRCSTRSAKNRRSPDRRTQQDSGSRGGSLCSK
AT1G32870.1	ANAC13, ANAC013	ANAC13 (Arabidopsis thaliana NAC domain protein 13); transcription factor	63	RDRQWFFFSLRDRKHGSRSSRATERGYWKAT
AT1G32870.2	ANAC13	ANAC13 (Arabidopsis thaliana NAC domain protein 13); transcription factor	63	RDRQWFFFSLRDRKHGSRSSRATERGYWKAT
AT1G32900.1		starch synthase, putative	50	NLQRRSQAKPVSAKSSKRSSKVKTAGK
AT1G32960.1	ATSBT3.3, SBT3.3	SBT3.3; identical protein binding / serine-type endopeptidase	478	SYIRSTRSPVVKIQRSRTLSGQP
AT1G33050.1		unknown protein	149	LSHKSLASGTKSMTSRRSTDDLSGFRK
AT1G33050.1		unknown protein	613	KRKDKYSVVSRETVPGSRS
AT1G33050.2		unknown protein	149	LSHKSLASGTKSMTSRRSTDDLSGFRK
AT1G33050.2		unknown protein	590	KSKDKYSVVSRETVPGSRS
AT1G33050.3		unknown protein	149	LSHKSLASGTKSMTSRRSTDDLSGFRK
AT1G33050.3		unknown protein	590	KSKDKYSVVSRETVPGSRS
AT1G33265.1		unknown protein	7	LPSPSLVSVRSTKLGRSVSNGGRNWS
AT1G33270.1		patatin-related	1	AMSLRSTPFISLRTRKSFNLSPRILALRLS
AT1G33270.2		patatin-related	1	AMSLRSTPFISLRTRKSFNLSPRILALRLS
AT1G33280.1	ANAC015	ANAC015 (Arabidopsis NAC domain containing protein 15); transcription factor	69	FSHKDRKYPTGSRTNRAT
AT1G33360.1		ATP-dependent Clp protease ATP-binding subunit ClpX, putative	10	KSLALHARSISPVSNLY
AT1G33360.1		ATP-dependent Clp protease ATP-binding subunit ClpX, putative	173	FNYRNKLRSSFWDTLRSYGA
AT1G33390.1		helicase domain-containing protein	28	DKLNSNNNTGSKKSRKRKLNSNVNTVA
AT1G33410.1	SAR1, NUP160, ATNUP160	SAR1 (suppressor of auxin resistance1)	797	IRYSKTGDDSSSLLRRST
AT1G33420.1		PHD finger family protein	651	ELYSKKPKQSKKERGSSQ
AT1G33430.1		galactosyltransferase family protein	15	LASFLAGSLFMSRTLSRSY
AT1G33430.1		galactosyltransferase family protein	97	AAARTSDRSSEFWSERSAKNQSRL
AT1G33475.1		INVOLVED IN: transport, vesicle-mediated transport; LOCATED IN: integral to membrane; EXPRESSED IN: inflorescence meristem, male gametophyte, sepal, carpel, petiole; EXPRESSED DURING: 4 anthesis; CONTAINS InterPro DOMAIN/s: Longin (InterPro:IPR010908), Longin-like (InterPro:IPR011012); BEST Arabidopsis thaliana protein match is: synaptobrevin-related family protein (TAIR:AT4G10170.2); Has 148 Bla…	197	SSESATYVPRRGRSGGSQSIERKWRRQVK
AT1G33475.1		INVOLVED IN: transport, vesicle-mediated transport; LOCATED IN: integral to membrane; EXPRESSED IN: inflorescence meristem, male gametophyte, sepal, carpel, petiole; EXPRESSED DURING: 4 anthesis; CONTAINS InterPro DOMAIN/s: Longin (InterPro:IPR010908), Longin-like (InterPro:IPR011012); BEST Arabidopsis thaliana protein match is: synaptobrevin-related family protein (TAIR:AT4G10170.2); Has 148 Bla…	93	KEANKKNSRGSFSGSISFSNVQD
AT1G33480.1		protein binding / zinc ion binding	146	PSRSRQSQDDPVPSLVSPD
AT1G33500.1		FUNCTIONS IN: molecular_function unknown; INVOLVED IN: biological_process unknown; LOCATED IN: cellular_component unknown; EXPRESSED IN: sperm cell, embryo, flower; EXPRESSED DURING: petal differentiation and expansion stage, D bilateral stage; BEST Arabidopsis thaliana protein match is: kinase interacting family protein (TAIR:AT3G22790.1); Has 3639 Blast hits to 2952 proteins in 364 species: Arc…	98	RDSLSAKLVSKRSNYLK
AT1G33520.1	MOS2	MOS2 (modifier of snc1, 2); RNA binding / nucleic acid binding / protein binding	300	DREKDKKTSGRGRGAERGSRSEVRASEKQ
AT1G33530.1		F-box family protein	154	ERSTSKSICIKFFSRRSG
AT1G33530.1		F-box family protein	70	HDDFLRKKQERSGKSPSCSETT
AT1G33560.1	ADR1	ADR1 (ACTIVATED DISEASE RESISTANCE 1); kinase	264	RLMSKIRGSTTLVVSRSKLADPR
AT1G33720.1	CYP76C6	CYP76C6; electron carrier/ heme binding / iron ion binding / monooxygenase/ oxygen binding	21	FFTTARSRRSPCQLSKSPPGPPRL
AT1G33780.1		unknown protein	45	SASPYRSLVVRATSKKSNDDSS
AT1G33790.1		jacalin lectin family protein	233	SDASKNRVRSLMFKTSKGRTSPI
AT1G33790.2		jacalin lectin family protein	440	SDASKNRVRSLMFKTSKGRTSPI
AT1G33880.1		avirulence-responsive family protein / avirulence induced gene (AIG1) family protein	3	SVSKPVSDDKKKGTSVS
AT1G33940.1		FUNCTIONS IN: molecular_function unknown; INVOLVED IN: biological_process unknown; LOCATED IN: cellular_component unknown; BEST Arabidopsis thaliana protein match is: EMB3013 (embryo defective 3013); ATP binding / binding / kinase/ protein kinase/ protein serine/threonine kinase (TAIR:AT5G18700.1); Has 81 Blast hits to 63 proteins in 27 species: Archae - 0; Bacteria - 0; Metazoa - 32; Fungi - 0; …	224	MTGRRHGPVSPLNSRASVKT
AT1G33940.2		FUNCTIONS IN: molecular_function unknown; INVOLVED IN: biological_process unknown; LOCATED IN: cellular_component unknown; BEST Arabidopsis thaliana protein match is: EMB3013 (embryo defective 3013); ATP binding / binding / kinase/ protein kinase/ protein serine/threonine kinase (TAIR:AT5G18700.1).	224	MTGRRHGPVSPLNSRASVKT
AT1G33960.1	AIG1	AIG1 (AVRRPT2-INDUCED GENE 1); GTP binding	58	GNSIVRSKVFKSKTKSSG
AT1G33980.1	ATUPF3, UPF3	Smg-4/UPF3 family protein	174	GLSDIRRGGRRTRVVSANKPSPRPSKRNSEKKKYV
AT1G33980.2	ATUPF3, UPF3	Smg-4/UPF3 family protein	176	GLSDIRRGGRRTRVVSANKPSPRPSKRNSEKKKYV
AT1G33990.1	ATMES14, MES14	MES14 (METHYL ESTERASE 14); hydrolase	53	LSQRFDGSMSRRVGSTSTRKRTLSDPF
AT1G34010.1		unknown protein	102	TNRFALKSSLKKRSFSDVV
AT1G34120.1	IP5PI, AT5P1, ATIP5PI, AT5PTASE1	IP5PI (INOSITOL POLYPHOSPHATE 5-PHOSPHATASE I); inositol trisphosphate phosphatase/ inositol-polyphosphate 5-phosphatase	268	NTPDRSLSMQINSDSKRE
AT1G34120.1	IP5PI, AT5P1, ATIP5PI, AT5PTASE1	IP5PI (INOSITOL POLYPHOSPHATE 5-PHOSPHATASE I); inositol trisphosphate phosphatase/ inositol-polyphosphate 5-phosphatase	306	LNQYVSERRGSFKSVNLT
AT1G34120.1	IP5PI, AT5P1, ATIP5PI, AT5PTASE1	IP5PI (INOSITOL POLYPHOSPHATE 5-PHOSPHATASE I); inositol trisphosphate phosphatase/ inositol-polyphosphate 5-phosphatase	43	SESDYSADSDDDYEDRS
AT1G34120.1	IP5PI, AT5P1, ATIP5PI, AT5PTASE1	IP5PI (INOSITOL POLYPHOSPHATE 5-PHOSPHATASE I); inositol trisphosphate phosphatase/ inositol-polyphosphate 5-phosphatase	4	RSRSRRTESNWATICCS
AT1G34120.2	IP5PI, AT5P1, ATIP5PI	IP5PI (INOSITOL POLYPHOSPHATE 5-PHOSPHATASE I); inositol trisphosphate phosphatase/ inositol-polyphosphate 5-phosphatase	272	NTPDRSLSMQINSDSKRE
AT1G34120.2	IP5PI, AT5P1, ATIP5PI	IP5PI (INOSITOL POLYPHOSPHATE 5-PHOSPHATASE I); inositol trisphosphate phosphatase/ inositol-polyphosphate 5-phosphatase	310	LNQYVSERRGSFKSVNLT
AT1G34120.2	IP5PI, AT5P1, ATIP5PI	IP5PI (INOSITOL POLYPHOSPHATE 5-PHOSPHATASE I); inositol trisphosphate phosphatase/ inositol-polyphosphate 5-phosphatase	43	SESDYSADSDDDYEDRS
AT1G34120.2	IP5PI, AT5P1, ATIP5PI	IP5PI (INOSITOL POLYPHOSPHATE 5-PHOSPHATASE I); inositol trisphosphate phosphatase/ inositol-polyphosphate 5-phosphatase	4	RSRSRRTESNWATICCS
AT1G34120.3	IP5PI, AT5P1, ATIP5PI	IP5PI (INOSITOL POLYPHOSPHATE 5-PHOSPHATASE I); inositol trisphosphate phosphatase/ inositol-polyphosphate 5-phosphatase	272	NTPDRSLSMQINSDSKRE
AT1G34120.3	IP5PI, AT5P1, ATIP5PI	IP5PI (INOSITOL POLYPHOSPHATE 5-PHOSPHATASE I); inositol trisphosphate phosphatase/ inositol-polyphosphate 5-phosphatase	310	LNQYVSERRGSFKSVNLT
AT1G34120.3	IP5PI, AT5P1, ATIP5PI	IP5PI (INOSITOL POLYPHOSPHATE 5-PHOSPHATASE I); inositol trisphosphate phosphatase/ inositol-polyphosphate 5-phosphatase	43	SESDYSADSDDDYEDRS
AT1G34120.3	IP5PI, AT5P1, ATIP5PI	IP5PI (INOSITOL POLYPHOSPHATE 5-PHOSPHATASE I); inositol trisphosphate phosphatase/ inositol-polyphosphate 5-phosphatase	4	RSRSRRTESNWATICCS
AT1G34150.1		tRNA pseudouridine synthase family protein	55	VKHDRSLSDSSSLVRRRRVRKGDKNSIPSHLIS
AT1G34180.1	anac016	anac016 (Arabidopsis NAC domain containing protein 16); transcription factor	505	SSFSRIRFNGTSVTSRK
AT1G34180.1	anac016	anac016 (Arabidopsis NAC domain containing protein 16); transcription factor	76	FTPRNRKYPNAARSSRGT
AT1G34180.2	anac016	anac016 (Arabidopsis NAC domain containing protein 16); transcription factor	517	SSFSRIRFNGTSVTSRK
AT1G34180.2	anac016	anac016 (Arabidopsis NAC domain containing protein 16); transcription factor	88	FTPRNRKYPNAARSSRGT
AT1G34190.1	anac017	anac017 (Arabidopsis NAC domain containing protein 17); transcription factor	75	YFTPRSRKYPNAARSNRGTEN
AT1G34260.1		phosphatidylinositol-4-phosphate 5-kinase family protein	1343	NKSPLYVSKTSKQNLQR
AT1G34300.1		lectin protein kinase family protein	76	AGTVDSRGSLRLHTSGSLRLTN
AT1G34320.1		unknown protein	527	GYGLRSPVKSPIRSPNQKTIQ
AT1G34320.1		unknown protein	594	ARLCKHHRLSKSSSHSPM
AT1G34320.1		unknown protein	81	IPRLSRVLSQKSRSTKSRQAAVAKVSE
AT1G34355.1		forkhead-associated domain-containing protein / FHA domain-containing protein	1217	ISRGIRSSSNLSDAKSKMK
AT1G34355.1		forkhead-associated domain-containing protein / FHA domain-containing protein	1272	LRELNEVKRSRSFLFRRRTEIASSAL
AT1G34355.1		forkhead-associated domain-containing protein / FHA domain-containing protein	1432	NDVLRERYNDRACRRKSTYNRGESG
AT1G34355.1		forkhead-associated domain-containing protein / FHA domain-containing protein	628	ETEGSRQVIEVSPKSFSE
AT1G34355.1		forkhead-associated domain-containing protein / FHA domain-containing protein	79	SISRFHLEIRSISSRQK
AT1G34380.1		5'-3' exonuclease family protein	128	LPSYKAHRKSPNHGRYSKRPHQFV
AT1G34380.2		5'-3' exonuclease family protein	128	LPSYKAHRKSPNHGRYSKRPHQFV
AT1G34550.1	EMB2756	EMB2756 (EMBRYO DEFECTIVE 2756)	346	DSSLVSKGGKSGKTSRSDTKRRGRRRSSGSCEMKLLNSS
AT1G34560.1		unknown protein	4	DRVLRHNKRLLQESRYSPYTL
AT1G34630.1		unknown protein	31	FTCKQCKNSDSKSKSKSVNDSDKLRRIIVA
AT1G34630.1		unknown protein	78	FSIVARFARRRRSSPQSRKTGEFSNSE
AT1G34630.2		unknown protein	31	FTCKQCKNSDSKSKSKSVNDSDKLRRIIVA
AT1G34630.2		unknown protein	78	FSIVARFARRRRSSPQSRKTGEFSNSE
AT1G34640.1		unknown protein	64	TAEERSAALARKSHPSRFRVYPMRMVL
AT1G34650.1	HDG10	HDG10 (HOMEODOMAIN GLABROUS 10); DNA binding / transcription factor	260	GNYKRYFTKNSHLKSRSALQSHHESSM
AT1G35140.1	PHI-1, EXL7	PHI-1 (PHOSPHATE-INDUCED 1)	159	RCGSHGTGSGSGKKGSR
AT1G35160.1	GRF4, 14-3-3PHI, GF14 PHI	GF14 PHI (GF14 PROTEIN PHI CHAIN); protein binding / protein phosphorylated amino acid binding	80	SRGNDDHVTTIRDYRSK
AT1G35210.1		unknown protein	106	GSGRGEKVISWMTKSRSV
AT1G35330.1		zinc finger (C3HC4-type RING finger) family protein	281	HMKTLPQARSSREGYRSGSVGSERRGKGKEKE
AT1G35350.1		LOCATED IN: integral to membrane; EXPRESSED IN: 18 plant structures; EXPRESSED DURING: 9 growth stages; CONTAINS InterPro DOMAIN/s: EXS, C-terminal (InterPro:IPR004342), SPX, N-terminal (InterPro:IPR004331); BEST Arabidopsis thaliana protein match is: EXS family protein / ERD1/XPR1/SYG1 family protein (TAIR:AT1G26730.1); Has 734 Blast hits to 697 proteins in 158 species: Archae - 0; Bacteria - 21…	44	LKRKLSGRRNFSGLTKRYSRTFSSR
AT1G35365.1		unknown protein	11	RNNKRLPQSRYSPYILRSE
AT1G35510.1		unknown protein	18	PSPSPPSSPRIRHTRGKSLAGGVY
AT1G35510.1		unknown protein	91	HGVEIVYRRGSPGSVYRSPKVFKRLWP
AT1G35530.1		DEAD/DEAH box helicase, putative	1164	AGPLTRINESRSDSDKSLSSLRTPKTTNSES
AT1G35540.1	ARF14	ARF14 (AUXIN RESPONSE FACTOR 14); transcription factor	353	LTPWSNVSRSSFLKNKRSREVNEIGSS
AT1G35580.1	CINV1	CINV1 (cytosolic invertase 1); beta-fructofuranosidase	27	DKPRLKIERKRSFDERSMSELSTGYSRHDGIHDSPRGRSVLDTPLSSARNSF
AT1G35580.2	CINV1	CINV1 (cytosolic invertase 1); beta-fructofuranosidase	27	DKPRLKIERKRSFDERSMSELSTGYSRHDGIHDSPRGRSVLDTPLSSARNSF
AT1G35580.3	CINV1	CINV1 (cytosolic invertase 1); beta-fructofuranosidase	27	DKPRLKIERKRSFDERSMSELSTGYSRHDGIHDSPRGRSVLDTPLSSARNSF
AT1G35660.1		unknown protein	296	EKIKSSGDSEKHSRGGSN
AT1G35660.1		unknown protein	900	SNGSSARTVPHSRKHNRKLQSKN
AT1G35780.1		unknown protein	27	SPAAVSSRSAARSHQPSDGISKV
AT1G35820.1		unknown protein	151	STARRGSSAQRSGGSSRVSIGSGSRGSQRRQSFETTI
AT1G35820.1		unknown protein	238	SDHSFGSPHLGGISSRSPS
AT1G35830.1		VQ motif-containing protein	87	PPPPPPSSSRNPRKRTRASRRAPTTV
AT1G35860.1	TOC75-I	TOC75-I (translocon outer membrane complex 75-I)	16	EKARPSRGNAYAKRSRSLSARLL
AT1G36078.1		unknown protein	13	RRRLSSIWPARVSTSRRKR
AT1G36150.1		protease inhibitor/seed storage/lipid transfer protein (LTP) family protein	157	VSHSPPPVRHSSPPVSHSSPPVSHSSPPTSRSSPAVSHSSPV
AT1G36150.1		protease inhibitor/seed storage/lipid transfer protein (LTP) family protein	214	SSPRAASPSPSPSPSISS
AT1G36180.1	ACC2	ACC2 (ACETYL-COA CARBOXYLASE 2); acetyl-CoA carboxylase	1103	EQTKRSELRSNIARSLSELE
AT1G36180.1	ACC2	ACC2 (ACETYL-COA CARBOXYLASE 2); acetyl-CoA carboxylase	1373	DKLKGYSNIQYSPSRDRQWHMYSVTDRP
AT1G36180.1	ACC2	ACC2 (ACETYL-COA CARBOXYLASE 2); acetyl-CoA carboxylase	37	KLRSSLRTFKGVSSRVRTF
AT1G36180.2	ACC2	ACC2 (ACETYL-COA CARBOXYLASE 2); acetyl-CoA carboxylase	37	KLRSSLRTFKGVSSRVRTF
AT1G36280.1		adenylosuccinate lyase, putative / adenylosuccinase, putative	20	RSLLNPSKSLSHLPRVSFSVSSPHSLK
AT1G36370.1	SHM7	SHM7 (serine hydroxymethyltransferase 7); catalytic/ glycine hydroxymethyltransferase/ pyridoxal phosphate binding	108	QSKHPKRSSIGDSDLESRRAAVR
AT1G36580.1		LOCATED IN: cellular_component unknown; BEST Arabidopsis thaliana protein match is: SDRB (SHORT-CHAIN DEHYDROGENASE-REDUCTASE B); binding / catalytic/ oxidoreductase (TAIR:AT3G12800.1); Has 374 Blast hits to 374 proteins in 114 species: Archae - 0; Bacteria - 176; Metazoa - 48; Fungi - 0; Plants - 77; Viruses - 0; Other Eukaryotes - 73 (source: NCBI BLink).	142	MSITWVKSPSNPRRRRGSMLAKDDGNSTV
AT1G36675.1		glycine-rich protein	133	TGSGSSGSKRTHESDVRDANSVGS
AT1G36730.1		eukaryotic translation initiation factor 5, putative / eIF-5, putative	193	GTSKDKVSKKKDHSPPRSLSDENDQ
AT1G36756.1		unknown protein	56	YSTSLLDPGSHRGGSRFYSIKAAL
AT1G36920.1		unknown protein	76	KSLYPFSTTRDSSVSRS
AT1G36970.1		FUNCTIONS IN: molecular_function unknown; INVOLVED IN: biological_process unknown; LOCATED IN: cellular_component unknown; CONTAINS InterPro DOMAIN/s: Region of unknown function DUF1985 (InterPro:IPR015410); BEST Arabidopsis thaliana protein match is: transcription factor (TAIR:AT1G31150.1); Has 104 Blast hits to 101 proteins in 4 species: Archae - 0; Bacteria - 0; Metazoa - 0; Fungi - 2; Plants …	192	LKSVKLPKFRYHKISRSRQSTSPPFKKVRLAL
AT1G36990.1		unknown protein	33	SHSDSASLQYNSRNRNSRSKSDVDSIHSPFLDRSSSTNSRRGSSNGSAKHAYSSFNFNRSQRDKDRSRDKDRVSYVDPWD
AT1G37113.1		unknown protein	234	MNSSDEDETPRRRKKKSSQ
AT1G38131.1		unknown protein	18	SNDNGCRSESPSPPLSP
AT1G38790.1		unknown protein	92	TIKASRSKKKLDTKSKTRTVFD
AT1G40104.1		unknown protein	134	YTMKALRSKRKGDTKPKTHMDFG
AT1G40104.1		unknown protein	479	YTMKALRSKRKGDTKPKTHMDFG
AT1G40129.1		unknown protein	70	ELKSKPPDNSLRSTQSRKED
AT1G40390.1		FUNCTIONS IN: molecular_function unknown; INVOLVED IN: biological_process unknown; LOCATED IN: cellular_component unknown; CONTAINS InterPro DOMAIN/s: Endonuclease/exonuclease/phosphatase (InterPro:IPR005135), RNA-directed DNA polymerase (reverse transcriptase), related (InterPro:IPR015706); BEST Arabidopsis thaliana protein match is: unknown protein (TAIR:AT1G43760.1); Has 480 Blast hits to 479 …	350	MSKHSTPRSTRSFKISRDHSTPRSSRRNHHFTSPLDHEV
AT1G41830.1	SKS6	SKS6 (SKU5-SIMILAR 6); pectinesterase	452	KTGSRNGYNLRDAVSRS
AT1G42430.1		unknown protein	164	GYRCRWSRMGGRSHDGSSE
AT1G42440.1		FUNCTIONS IN: molecular_function unknown; INVOLVED IN: ribosome biogenesis; LOCATED IN: nucleus; EXPRESSED IN: 22 plant structures; EXPRESSED DURING: 13 growth stages; CONTAINS InterPro DOMAIN/s: AARP2CN (InterPro:IPR012948), Protein of unknown function DUF663 (InterPro:IPR007034); BEST Arabidopsis thaliana protein match is: unknown protein (TAIR:AT1G06720.1); Has 2447 Blast hits to 1812 proteins…	0	MGRSRVQVNKAHKTRFSSKSSRNLHRTNLQDSGRI
AT1G42440.1		FUNCTIONS IN: molecular_function unknown; INVOLVED IN: ribosome biogenesis; LOCATED IN: nucleus; EXPRESSED IN: 22 plant structures; EXPRESSED DURING: 13 growth stages; CONTAINS InterPro DOMAIN/s: AARP2CN (InterPro:IPR012948), Protein of unknown function DUF663 (InterPro:IPR007034); BEST Arabidopsis thaliana protein match is: unknown protein (TAIR:AT1G06720.1); Has 2447 Blast hits to 1812 proteins…	490	VPARRRFAKYRGLKSFRTSSW
AT1G42540.1	ATGLR3.3, GLR3.3	ATGLR3.3; intracellular ligand-gated ion channel	900	KRKIDGSMNDTSGSTRSRGFDRERSFNSVNPL
AT1G42550.1	PMI1	PMI1 (PLASTID MOVEMENT IMPAIRED1)	312	NSFGRKQSKTSFSVPSPKMTSRSEA
AT1G42550.1	PMI1	PMI1 (PLASTID MOVEMENT IMPAIRED1)	66	LTVSKPRARRLSLSPWRSRPKLEVE
AT1G42560.1	MLO9, ATMLO9	MLO9 (MILDEW RESISTANCE LOCUS O 9); calmodulin binding	239	RSVRKSDYLTMRHGFIS
AT1G42990.1	ATBZIP60, BZIP60	ATBZIP60 (BASIC REGION/LEUCINE ZIPPER MOTIF 60); DNA binding / transcription factor	266	SSKPSYTGVSRRCKGSRPRMK
AT1G43000.1		zinc-binding family protein	190	ETPSIESHRNYPMKSRRKGI
AT1G43020.1		unknown protein	110	SSVSDKSVLSRLKQFSKT
AT1G43020.1		unknown protein	292	CHSPSRLRTLFSPAKSSKTSSGRH
AT1G43020.2		unknown protein	110	SSVSDKSVLSRLKQFSKT
AT1G43020.3		unknown protein	110	SSVSDKSVLSRLKQFSKT
AT1G43020.3		unknown protein	292	CHSPSRLRTLFSPAKSSKTSSGRH
AT1G43020.4		unknown protein	110	SSVSDKSVLSRLKQFSKT
AT1G43145.1		unknown protein	107	SNKDRYYHSRFKPTSSHRSREKQGME
AT1G43260.1		FUNCTIONS IN: molecular_function unknown; INVOLVED IN: biological_process unknown; LOCATED IN: cellular_component unknown; CONTAINS InterPro DOMAIN/s: Protein of unknown function DUF659 (InterPro:IPR007021); BEST Arabidopsis thaliana protein match is: protein dimerization (TAIR:AT5G31412.1); Has 380 Blast hits to 376 proteins in 17 species: Archae - 0; Bacteria - 0; Metazoa - 6; Fungi - 2; Plants…	105	NGCSVTTDSWSDRKRRSIMN
AT1G43560.1	Aty2	Aty2 (Arabidopsis thioredoxin y2); electron carrier/ protein disulfide oxidoreductase	22	SPSRTLSSVRLPSQIRR
AT1G43630.1		unknown protein	197	EKDSSNTHRNRSFTRNKDHNQHIGYIRSLSWSVSRSWSASRQLQ
AT1G43630.1		unknown protein	31	PETEYSFGRSFLSLRRDQAHLM
AT1G43640.1	AtTLP5	AtTLP5 (TUBBY LIKE PROTEIN 5); phosphoric diester hydrolase/ transcription factor	209	NSSQILSPPNRSRSFNSKKVSPKVPSGSY
AT1G43640.1	AtTLP5	AtTLP5 (TUBBY LIKE PROTEIN 5); phosphoric diester hydrolase/ transcription factor	280	EFLQRSLDESFRSIGSSKIVN
AT1G43640.1	AtTLP5	AtTLP5 (TUBBY LIKE PROTEIN 5); phosphoric diester hydrolase/ transcription factor	4	SIVRDVRDTVGSFSRRSFDVRVSNGTTHQRS
AT1G43690.1		ubiquitin interaction motif-containing protein	36	GSGSQSGGESPEAKSRRL
AT1G43720.1		unknown protein	67	DESTARRGSSAQRSGGSSLVSIGSGSRRSHRRQSFETTIQDSI
AT1G43722.1		unknown protein	266	LAPYRSSRNRVVRYHMS
AT1G43760.1		FUNCTIONS IN: molecular_function unknown; INVOLVED IN: biological_process unknown; LOCATED IN: cellular_component unknown; CONTAINS InterPro DOMAIN/s: RNA-directed DNA polymerase (reverse transcriptase), related (InterPro:IPR015706), Endonuclease/exonuclease/phosphatase (InterPro:IPR005135); BEST Arabidopsis thaliana protein match is: unknown protein (TAIR:AT1G40390.1); Has 2614 Blast hits to 255…	125	PPGWGAMSSKSRKRWRHKWNISRSSAADHISKVSGSPRA
AT1G43760.1		FUNCTIONS IN: molecular_function unknown; INVOLVED IN: biological_process unknown; LOCATED IN: cellular_component unknown; CONTAINS InterPro DOMAIN/s: RNA-directed DNA polymerase (reverse transcriptase), related (InterPro:IPR015706), Endonuclease/exonuclease/phosphatase (InterPro:IPR005135); BEST Arabidopsis thaliana protein match is: unknown protein (TAIR:AT1G40390.1); Has 2614 Blast hits to 255…	30	YNIFDWKGRVRSRSKKRSSSTPPRLITS
AT1G43770.1		PHD finger family protein	203	KETMESKRQESSDSRKPHE
AT1G43770.2		PHD finger family protein	203	KETMESKRQESSDSRKPHE
AT1G43970.1		unknown protein	78	VPGVSSVTSRLAKRKRDTPSEEFLS
AT1G43980.1		pentatricopeptide (PPR) repeat-containing protein	2	SSLYFSRLVNRSLLSKSPTLAK
AT1G44020.1		DC1 domain-containing protein	439	RVIRISRHRHRISFTTSFDEGD
AT1G44050.1		DC1 domain-containing protein	140	SRHPHRISFTSSLPSRT
AT1G44110.1	CYCA1;1	CYCA1;1 (Cyclin A1;1); cyclin-dependent protein kinase regulator	6	NRRSSFSSSTKSSLAKRQ
AT1G44110.1	CYCA1;1	CYCA1;1 (Cyclin A1;1); cyclin-dependent protein kinase regulator	94	PHKVASSPSKSDDGSVSMDETRSSSDSYKSP
AT1G44120.1		C2 domain-containing protein / armadillo/beta-catenin repeat family protein	1967	MKSKLKSPAPSSFHERGNS
AT1G44160.1		DNAJ chaperone C-terminal domain-containing protein	118	STNPTLRSLSFIGRSKSSSNRMT
AT1G44170.1	ALDH3H1, ALDH4	ALDH3H1 (ALDEHYDE DEHYDROGENASE 3H1); 3-chloroallyl aldehyde dehydrogenase/ aldehyde dehydrogenase (NAD)	443	RSLFGDSAVRYPPYSRG
AT1G44170.2	ALDH3H1, ALDH4	ALDH3H1 (ALDEHYDE DEHYDROGENASE 3H1); 3-chloroallyl aldehyde dehydrogenase/ aldehyde dehydrogenase (NAD)	443	RSLFGDSAVRYPPYSRG
AT1G44170.3	ALDH3H1, ALDH4	ALDH3H1 (ALDEHYDE DEHYDROGENASE 3H1); 3-chloroallyl aldehyde dehydrogenase/ aldehyde dehydrogenase (NAD)	380	RSLFGDSAVRYPPYSRG
AT1G44180.1		aminoacylase, putative / N-acyl-L-amino-acid amidohydrolase, putative	139	YLEAIRNLKSRSFSPLRTIHISY
AT1G44191.1		Encodes a ECA1 gametogenesis related family protein	129	KKSPPPPKPSSPPPTPKKSPPPPKPSSPPPSPKKSPPPPKPSPSPPKPSTPPPTPKKSPPSPPKPSSPPPSPKKSPPPPKPSPSPPKPSTPPPTPKKS
AT1G44191.1		Encodes a ECA1 gametogenesis related family protein	229	PPKPSQPPPKPSPPRRKPSPPTPKPSTTPPSPKPSPPRPTPKKSPPPPTTPSPS
AT1G44191.1		Encodes a ECA1 gametogenesis related family protein	83	PPTPSSRPPSPLSPKKSPPSPKPSPPPRTPKKSPPPPKPSSPPP
AT1G44224.1		Encodes a ECA1 gametogenesis related family protein	160	TKDGSKTSKKSFSKILSS
AT1G44446.1	CH1, ATCAO, CAO	CH1 (CHLORINA 1); chlorophyllide a oxygenase	11	SLPISFSKTRSSFLSRKKGVKGE
AT1G44446.2	CH1, ATCAO, CAO	CH1 (CHLORINA 1); chlorophyllide a oxygenase	11	SLPISFSKTRSSFLSRKKGVKGE
AT1G44446.3	CH1, ATCAO, CAO	CH1 (CHLORINA 1); chlorophyllide a oxygenase	11	SLPISFSKTRSSFLSRKKGVKGE
AT1G44608.1		unknown protein	151	SFKSRSRACHLSAKVKSED
AT1G44740.1		unknown protein	125	KLHNSIKFSCGSKMRRRRYNVST
AT1G44760.1		universal stress protein (USP) family protein	6	SILRQLSRKEGWRSASKRWTSGDS
AT1G44780.1		unknown protein	395	WNSRRRSSTSFAPPPKPKV
AT1G44780.2		unknown protein	394	WNSRRRSSTSFAPPPKPKV
AT1G44820.1		aminoacylase, putative / N-acyl-L-amino-acid amidohydrolase, putative	137	YLESIRNLKSRGFSPLRTIH
AT1G44890.1		unknown protein	3	VRCLSLRSVLNPQRYRSSYSFL
AT1G44890.1		unknown protein	61	SRYRSVFQSPATISSDRF
AT1G44900.1	MCM2	ATP binding / DNA binding / DNA-dependent ATPase	130	LHDNDSDDWNYRPSKRSRTTVPPRGNGGDP
AT1G44910.1		protein binding	890	NSDEDVSSDRDDRDESKKSSRKHGNDRKKSRKHANSPESESENRHKRQKKESSRRSGNDELE
AT1G44910.2		protein binding	890	NSDEDVSSDRDDRDESKKSSRKHGNDRKKSRKVGT
AT1G45160.1		kinase	55	PRGHGRTTGSSKQERKGTKLSR
AT1G45160.2		kinase	55	PRGHGRTTGSSKQERKGTKLSR
AT1G45180.1		zinc finger (C3HC4-type RING finger) family protein	405	QNNSLHNQRRLSENFRRSLLSSL
AT1G45180.1		zinc finger (C3HC4-type RING finger) family protein	477	ISHSLRGLASTSRGRTRMG
AT1G45191.2	BGLU1	BGLU1 (BETA GLUCOSIDASE 1); catalytic/ cation binding / hydrolase, hydrolyzing O-glycosyl compounds	435	SFGLYSVNFSDPHRKRSPKLSAHWYSGFLK
AT1G45191.2	BGLU1	BGLU1 (BETA GLUCOSIDASE 1); catalytic/ cation binding / hydrolase, hydrolyzing O-glycosyl compounds	99	FRFSISWSRLISNGRGS
AT1G45207.2		remorin family protein	122	ARSSFSVALRECQERRSRSEAL
AT1G45207.2		remorin family protein	372	SPEGSIRFSPERQCSFSPSSPSP
AT1G45207.2		remorin family protein	3	ESSYKVHRPAKSGGSRRDSSPDSIIFT
AT1G45231.2		WW domain-containing protein	281	AYVVSSVRKAKKESRRSRAKKKLLNSYTGT
AT1G45248.2		FUNCTIONS IN: molecular_function unknown; INVOLVED IN: biological_process unknown; LOCATED IN: cellular_component unknown; CONTAINS InterPro DOMAIN/s: WIYLD domain (InterPro:IPR018848); BEST Arabidopsis thaliana protein match is: unknown protein (TAIR:AT2G40020.3); Has 15 Blast hits to 15 proteins in 5 species: Archae - 0; Bacteria - 0; Metazoa - 0; Fungi - 0; Plants - 15; Viruses - 0; Other Euka…	81	KKQLRKNQKKKSFSIRRSTTSRLCTP
AT1G45248.3		FUNCTIONS IN: molecular_function unknown; INVOLVED IN: biological_process unknown; LOCATED IN: cellular_component unknown; CONTAINS InterPro DOMAIN/s: WIYLD domain (InterPro:IPR018848); BEST Arabidopsis thaliana protein match is: unknown protein (TAIR:AT2G40020.3).	81	KKQLRKNQKKKSFSIRRSTTSRLCTP
AT1G45545.1		unknown protein	135	VHPRSSGSPRFVSPTSPVLI
AT1G45616.1	AtRLP6	AtRLP6 (Receptor Like Protein 6); protein binding	144	SKFMRLERLNLSRSSFS
AT1G45688.1		unknown protein	50	LSPMGSPPHSHSSMGRHSRESSSSRFSGSLKPGSRKVNPN
AT1G45688.1		unknown protein	6	SEVTSLAASSPARSPRRPVYYVQSPSRDSHDG
AT1G45688.2		unknown protein	50	LSPMGSPPHSHSSMGRHSRESSSSRFSGSLKPGSRKVNPN
AT1G45688.2		unknown protein	6	SEVTSLAASSPARSPRRPVYYVQSPSRDSHDG
AT1G46264.1	AT-HSFB4, HSFB4	AT-HSFB4; DNA binding / transcription factor	302	RKTKLFGVSLPSSKKRSHHFSDQTSKTRL
AT1G46408.1	AGL97	AGL97 (AGAMOUS-LIKE 97); DNA binding / transcription factor	11	KIQNKNPRAVSFSKRRKGLYSKAS
AT1G46696.1		unknown protein	209	LRSLEKTKYQPSDSGSR
AT1G46840.1		F-box family protein	424	YSTTRSYKSSGKRCSDRSIGE
AT1G47056.1	VFB1	VFB1 (VIER F-BOX PROTEINE 1); ubiquitin-protein ligase	2	QSTSAAGNSILNRRRSKSFTLKFPIESIES
AT1G47056.1	VFB1	VFB1 (VIER F-BOX PROTEINE 1); ubiquitin-protein ligase	97	SRFDSVTKLSLKCDRRSV
AT1G47200.1	WPP2	WPP2	128	YSKEISKRMLESVKARS
AT1G47270.1	AtTLP6	AtTLP6 (TUBBY LIKE PROTEIN 6); phosphoric diester hydrolase/ transcription factor	38	IGRRGRSHIAPEGSSVSSS
AT1G47330.1		FUNCTIONS IN: molecular_function unknown; INVOLVED IN: biological_process unknown; LOCATED IN: plasma membrane; EXPRESSED IN: 22 plant structures; EXPRESSED DURING: 13 growth stages; CONTAINS InterPro DOMAIN/s: Protein of unknown function DUF21 (InterPro:IPR002550), Cystathionine beta-synthase, core (InterPro:IPR000644); BEST Arabidopsis thaliana protein match is: CBS domain-containing protein (T…	490	PSNSSPTRKPSVSSPTREPSDSSH
AT1G47350.1		F-box family protein-related	501	YKPYMYAGEEERRKRSRRTRRSTIRR
AT1G47655.1		Dof-type zinc finger domain-containing protein	69	RDVPVGGGTRRSSSKRHRSFSTTATSS
AT1G47730.1		F-box family protein	0	MEQREEKTENIQRKRSRGKSSSSSLPLDL
AT1G47740.1		unknown protein	223	NEKRSLRSSFSCLSSISMRQ
AT1G47740.2		unknown protein	223	NEKRSLRSSFSCLSSISMRQ
AT1G47765.1		F-box family protein	0	MEQQKQKKRKVVSKSKRTQSKSASSLPLD
AT1G47790.1		F-box family protein	193	SAQKSWRTVKTKHKHRS
AT1G47790.1		F-box family protein	2	QQEKKKRKVYRRRRLQSKPTSSFPLD
AT1G47900.1		unknown protein	1011	TSDTTTSPSRVGSRLSRSGSSTNATP
AT1G47900.1		unknown protein	233	RSAADSDALSRTLQERS
AT1G47900.1		unknown protein	367	RSPVKVSSPCKSPGGYS
AT1G47900.1		unknown protein	539	SSNGSIDSKDGSGDQKS
AT1G48000.1	MYB112, AtMYB112	MYB112 (myb domain protein 112); DNA binding / transcription factor	46	SYISLHGEGRWNSLSRSAGLNRTGKSCRLRW
AT1G48020.1	PMEI1, ATPMEI1	PMEI1 (PECTIN METHYLESTERASE INHIBITOR 1); pectinesterase inhibitor	143	RLRSVDSSVVNNSKTIK
AT1G48030.1	mtLPD1	mtLPD1 (mitochondrial lipoamide dehydrogenase 1); ATP binding / dihydrolipoyl dehydrogenase	18	SNSPTDALRFSFSLSRG
AT1G48030.2	mtLPD1	mtLPD1 (mitochondrial lipoamide dehydrogenase 1); ATP binding / dihydrolipoyl dehydrogenase	18	SNSPTDALRFSFSLSRG
AT1G48090.1		phosphoinositide binding	3059	ERQHGVVSSRKSAHVYSA
AT1G48090.2		phosphoinositide binding	3059	ERQHGVVSSRKSAHVYSA
AT1G48110.1	ECT7	ECT7 (evolutionarily conserved C-terminal region 7)	132	SLVETGSANRGRSDGRGSRQRSGTATAGL
AT1G48110.1	ECT7	ECT7 (evolutionarily conserved C-terminal region 7)	181	RPNSGQSRQSEMDKSDS
AT1G48110.2	ECT7	ECT7 (evolutionarily conserved C-terminal region 7)	132	SLVETGSANRGRSDGRGSRQRSGTATAGL
AT1G48110.2	ECT7	ECT7 (evolutionarily conserved C-terminal region 7)	181	RPNSGQSRQSEMDKSDS
AT1G48120.1		calcineurin-like phosphoesterase family protein	1314	NDSVDSKNKGSLDKSQSVP
AT1G48160.1		signal recognition particle 19 kDa protein, putative / SRP19, putative	19	NSKKTVAEGRRISVSKSC
AT1G48280.1		hydroxyproline-rich glycoprotein family protein	11	SRVRAANSHYSVISKPR
AT1G48280.1		hydroxyproline-rich glycoprotein family protein	211	VAVESSRLSPPSPSPSRLPPTP
AT1G48325.1		Expressed protein	0	MKMGGHGRRRKSSSSFSVVKSLFAR
AT1G48360.1		hydrolase, acting on acid anhydrides, in phosphorus-containing anhydrides / nucleic acid binding / zinc ion binding	63	PSKFSDDLSLSTRKKRRL
AT1G48360.2		hydrolase, acting on acid anhydrides, in phosphorus-containing anhydrides / nucleic acid binding / zinc ion binding	63	PSKFSDDLSLSTRKKRRL
AT1G48360.3		hydrolase, acting on acid anhydrides, in phosphorus-containing anhydrides / nucleic acid binding / zinc ion binding	63	PSKFSDDLSLSTRKKRRL
AT1G48405.1		FUNCTIONS IN: molecular_function unknown; INVOLVED IN: biological_process unknown; CONTAINS InterPro DOMAIN/s: KIP1-like (InterPro:IPR011684); BEST Arabidopsis thaliana protein match is: unknown protein (TAIR:AT3G17680.1); Has 119 Blast hits to 117 proteins in 34 species: Archae - 0; Bacteria - 22; Metazoa - 7; Fungi - 8; Plants - 57; Viruses - 0; Other Eukaryotes - 25 (source: NCBI BLink).	242	LENSKKKSKKRKMSETRSETGEKMRSK
AT1G48490.1		kinase	0	MVFKSKLFFSSKKSRSSSPSSSNSPRSVGSDSPIRSDKKKPKSNSKEETRSPNTKKH
AT1G48490.2		kinase	0	MVFKSKLFFSSKKSRSSSPSSSNSPRSVGSDSPIRSDKKKPKSNSKEETRSPNTKKH
AT1G48490.3		kinase	0	MVFKSKLFFSSKKSRSSSPSSSNSPRSVGSDSPIRSDKKKPKSNSKEETRSPNTKKH
AT1G48510.1		cytochrome c oxidase assembly protein surfeit-related	117	EQRSIYVGPKPRSMSKSSE
AT1G48520.1	GATB	GATB (GLU-ADT SUBUNIT B); carbon-nitrogen ligase, with glutamine as amido-N-donor / glutaminyl-tRNA synthase (glutamine-hydrolyzing)/ ligase	14	SLLGTSLLRRRRSNNFSVRSCGSQTT
AT1G48520.2	GATB	GATB (GLU-ADT SUBUNIT B); carbon-nitrogen ligase, with glutamine as amido-N-donor / glutaminyl-tRNA synthase (glutamine-hydrolyzing)/ ligase	14	SLLGTSLLRRRRSNNFSVRSCGSQTT
AT1G48520.3	GATB	GATB (GLU-ADT SUBUNIT B); carbon-nitrogen ligase, with glutamine as amido-N-donor / glutaminyl-tRNA synthase (glutamine-hydrolyzing)/ ligase	14	SLLGTSLLRRRRSNNFSVRSCGSQTT
[truncated: 11,678 more rows]
